# Supplementary material
Source: publisher figshare collection journal article supplement (https://geolsoc.figshare.com/articles/dataset/_/3453521)
Supplement: Supplementary file 1 [file 1]

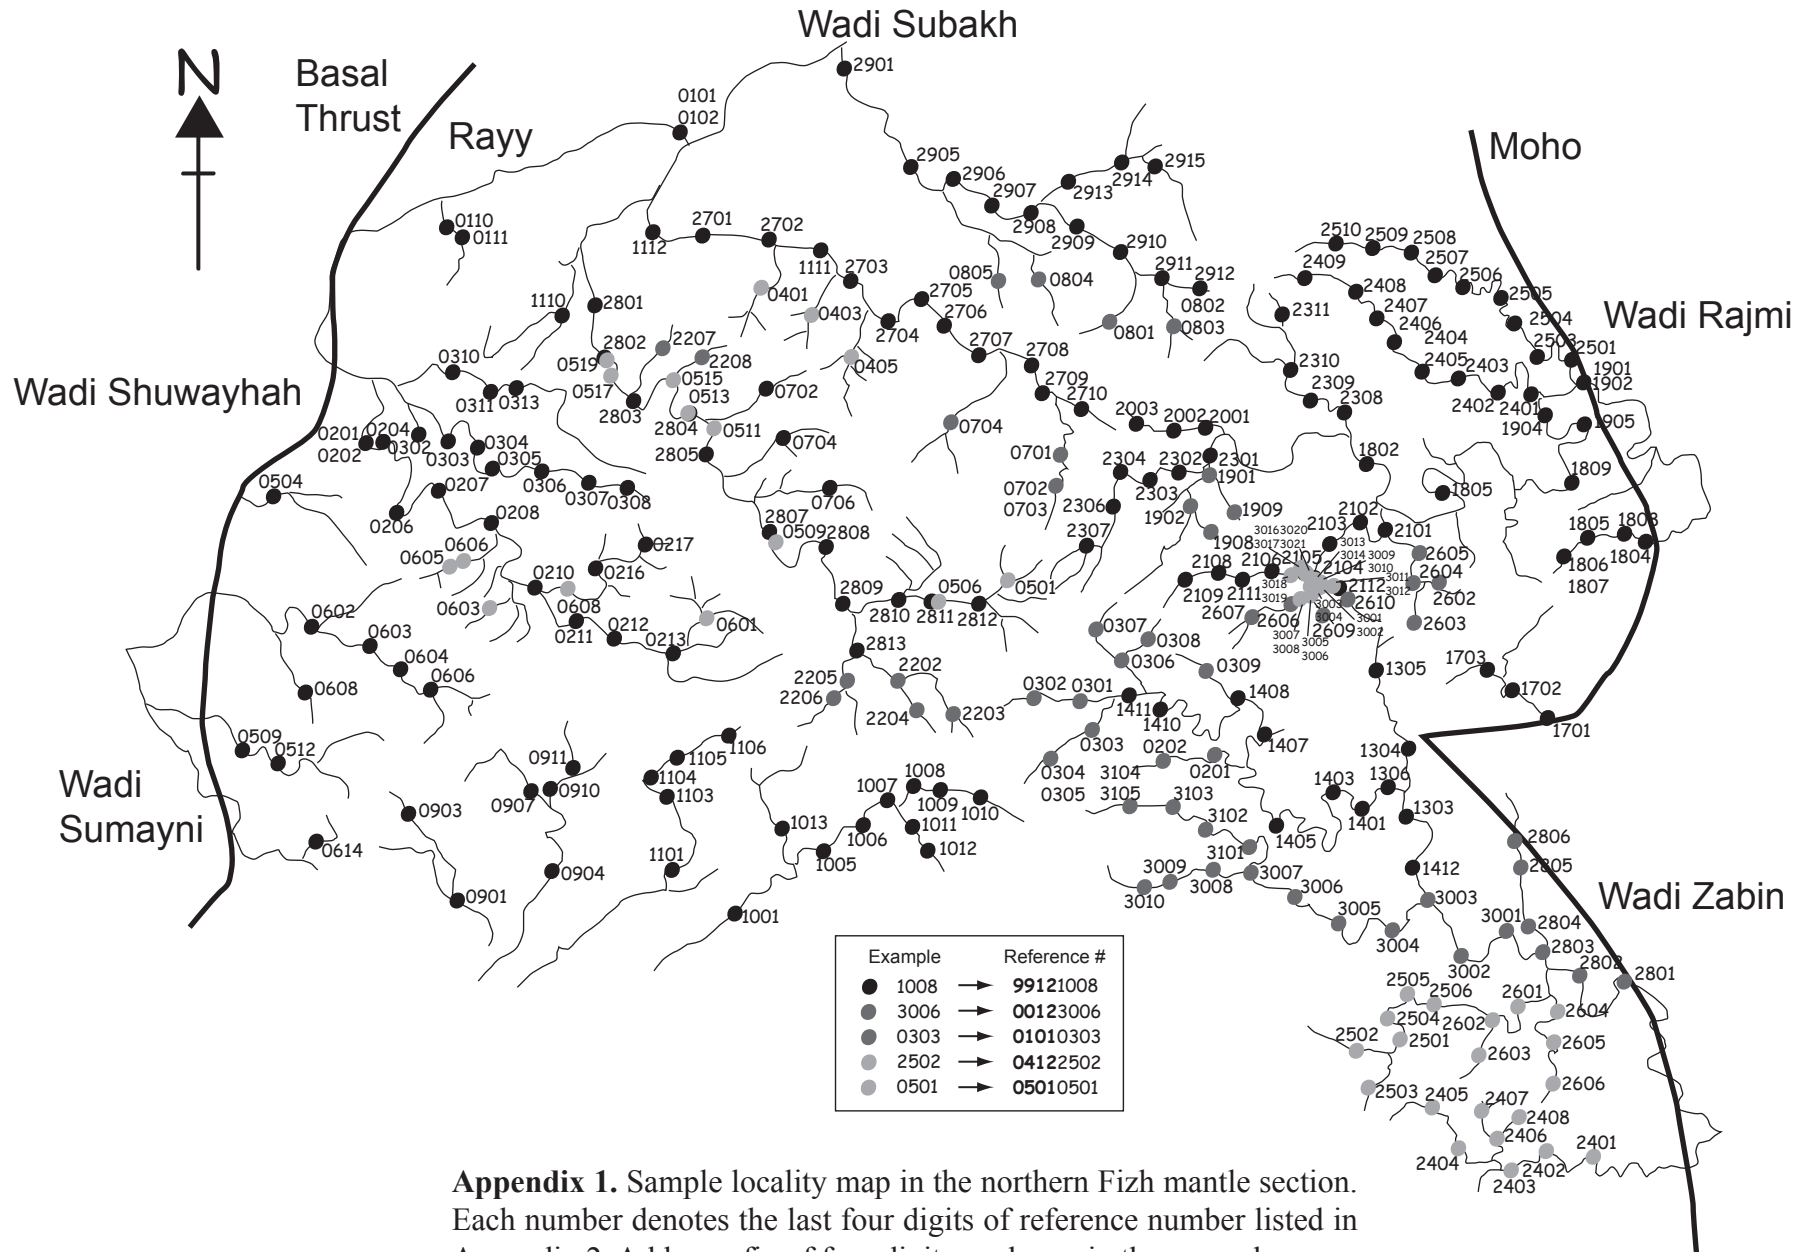

**Appendix 1.** Sample locality map in the northern Fizh mantle section. Each number denotes the last four digits of reference number listed in Appendix 2. Add a prefix of four digits as shown in the example.
