# Supplementary material
Source: publisher figshare collection journal article supplement (https://geolsoc.figshare.com/articles/dataset/_/3453521)
Supplement: Supplementary file 2 [file 1]

**Appendix 1. Major element compositions (wt%) of primary minerals in peridotites from the northern Fizh mantle section in the northern Oman ophiolite**

| Reference No.               | Mineral              | Mode (wt%) | SiO <sub>2</sub> | TiO <sub>2</sub> | Al <sub>2</sub> O <sub>3</sub> | Cr <sub>2</sub> O <sub>3</sub> | FeO <sup>T</sup> <sup>b</sup> | MnO  | NiO  | MgO   | CaO   | Na <sub>2</sub> O | K <sub>2</sub> O | Total  | Mg# <sup>c, d</sup> | Cr# <sup>d</sup> | Fe <sup>3+</sup> # <sup>d</sup> |
|-----------------------------|----------------------|------------|------------------|------------------|--------------------------------|--------------------------------|-------------------------------|------|------|-------|-------|-------------------|------------------|--------|---------------------|------------------|---------------------------------|
| UTM coordinate <sup>a</sup> |                      |            |                  |                  |                                |                                |                               |      |      |       |       |                   |                  |        |                     |                  |                                 |
| 99111802                    | olivine              |            | 41.78            | 0.00             | 0.02                           | 0.02                           | 8.47                          | 0.11 | 0.39 | 51.26 | 0.02  | 0.01              | 0.00             | 102.09 | 0.915               |                  |                                 |
| Wadi Rajimi                 | opx                  |            | 57.55            | 0.02             | 1.76                           | 0.61                           | 5.60                          | 0.15 | 0.12 | 35.03 | 0.64  | 0.00              | 0.00             | 101.47 | 0.918               |                  |                                 |
| 0423.32 / 2722.16           | cpx                  |            | 54.25            | 0.05             | 1.95                           | 0.91                           | 1.99                          | 0.09 | 0.08 | 17.84 | 24.14 | 0.13              | 0.00             | 101.41 | 0.941               |                  |                                 |
|                             | spinel               |            | 0.07             | 0.07             | 22.32                          | 45.81                          | 20.25                         | 0.25 | 0.08 | 12.38 | 0.01  | 0.01              | 0.00             | 101.25 | 0.567               | 0.579            | 0.020                           |
| 99111805                    | olivine <sup>e</sup> |            | 41.23            | –                | 0.00                           | 0.00                           | 8.81                          | –    | –    | 49.83 | 0.02  | –                 | –                | 99.89  | 0.910               |                  |                                 |
| Wadi Rajimi                 | opx                  |            | 57.22            | 0.03             | 2.38                           | 0.63                           | 5.60                          | 0.13 | 0.08 | 33.86 | 0.77  | 0.00              | 0.00             | 100.69 | 0.915               |                  |                                 |
| 0422.84 / 2723.32           | cpx                  |            | –                | –                | –                              | –                              | –                             | –    | –    | –     | –     | –                 | –                | –      |                     |                  |                                 |
|                             | spinel               |            | 0.16             | 0.06             | 29.83                          | 39.10                          | 17.71                         | 0.21 | 0.08 | 14.62 | 0.00  | 0.00              | 0.00             | 101.75 | 0.636               | 0.468            | 0.016                           |
| 99111809                    | olivine              |            | 42.22            | 0.00             | 0.01                           | 0.01                           | 8.44                          | 0.08 | 0.38 | 51.48 | 0.01  | 0.00              | 0.00             | 102.62 | 0.916               |                  |                                 |
| Wadi Rajimi                 | opx                  |            | 56.79            | 0.01             | 2.11                           | 0.65                           | 5.61                          | 0.13 | 0.08 | 34.08 | 2.00  | 0.00              | 0.00             | 101.44 | 0.915               |                  |                                 |
| 0423.05 / 2725.26           | cpx                  |            | 53.43            | 0.03             | 2.90                           | 1.10                           | 2.10                          | 0.09 | 0.03 | 17.27 | 24.29 | 0.04              | 0.00             | 101.28 | 0.936               |                  |                                 |
|                             | spinel               |            | 0.10             | 0.05             | 27.99                          | 40.17                          | 18.34                         | 0.24 | 0.09 | 13.99 | 0.01  | 0.01              | 0.00             | 100.97 | 0.622               | 0.491            | 0.018                           |
| 99111901                    | olivine              | 61.83      | 41.70            | 0.01             | 0.00                           | 0.02                           | 8.81                          | 0.14 | 0.39 | 50.64 | 0.02  | 0.01              | 0.00             | 101.71 | 0.911               |                  |                                 |
| Wadi Rajimi                 | opx                  | 32.91      | 56.84            | 0.01             | 2.25                           | 0.55                           | 5.93                          | 0.12 | 0.06 | 34.18 | 1.00  | 0.00              | 0.00             | 100.94 | 0.911               |                  |                                 |
| 0424.53 / 2725.47           | cpx                  | 2.64       | 54.12            | 0.03             | 2.15                           | 0.77                           | 1.85                          | 0.05 | 0.04 | 18.86 | 22.22 | 0.04              | 0.00             | 100.15 | 0.947               |                  |                                 |
|                             | spinel               | 0.87       | 0.10             | 0.04             | 29.68                          | 37.43                          | 19.62                         | 0.21 | 0.11 | 13.88 | 0.00  | 0.01              | 0.00             | 101.08 | 0.613               | 0.458            | 0.023                           |
| 99111902                    | olivine              |            | 41.53            | 0.00             | 0.00                           | 0.03                           | 9.90                          | 0.13 | 0.30 | 49.89 | 0.00  | 0.00              | 0.00             | 101.79 | 0.900               |                  |                                 |
| Wadi Rajimi                 | opx                  |            | 57.09            | 0.09             | 1.79                           | 0.49                           | 6.53                          | 0.16 | 0.07 | 33.29 | 2.01  | 0.00              | 0.00             | 101.54 | 0.901               |                  |                                 |
| 0424.53 / 2725.47           | cpx                  |            | 53.86            | 0.18             | 2.01                           | 0.83                           | 2.09                          | 0.09 | 0.03 | 17.13 | 24.14 | 0.20              | 0.00             | 100.56 | 0.936               |                  |                                 |
|                             | spinel               |            | 0.05             | 0.32             | 24.05                          | 40.92                          | 23.07                         | 0.25 | 0.11 | 11.75 | 0.00  | 0.00              | 0.00             | 100.52 | 0.538               | 0.533            | 0.031                           |
| 99112001                    | olivine              |            | 41.47            | 0.02             | 0.01                           | 0.02                           | 8.58                          | 0.12 | 0.38 | 50.51 | 0.02  | 0.01              | 0.00             | 101.15 | 0.913               |                  |                                 |
| Wadi Rajimi                 | opx                  |            | 57.43            | 0.03             | 1.65                           | 0.50                           | 5.59                          | 0.14 | 0.11 | 34.68 | 0.62  | 0.01              | 0.00             | 100.76 | 0.917               |                  |                                 |
| 0423.84 / 2719.63           | cpx                  |            | 54.49            | 0.02             | 1.55                           | 0.70                           | 1.96                          | 0.02 | 0.06 | 17.81 | 24.27 | 0.11              | 0.00             | 101.00 | 0.942               |                  |                                 |
|                             | spinel               |            | 0.12             | 0.07             | 22.33                          | 44.89                          | 20.10                         | 0.26 | 0.06 | 12.01 | 0.02  | 0.04              | 0.00             | 99.90  | 0.557               | 0.574            | 0.018                           |
| 99112002                    | olivine              |            | 41.50            | 0.01             | 0.00                           | 0.01                           | 8.58                          | 0.11 | 0.37 | 50.20 | 0.01  | 0.00              | 0.00             | 100.79 | 0.913               |                  |                                 |
| Wadi Rajimi                 | opx                  |            | 56.68            | 0.03             | 1.76                           | 0.55                           | 5.62                          | 0.13 | 0.05 | 34.55 | 1.06  | 0.01              | 0.00             | 100.43 | 0.916               |                  |                                 |
| 0423.79 / 2719.16           | cpx                  |            | 53.51            | 0.05             | 1.78                           | 0.61                           | 1.88                          | 0.08 | 0.08 | 17.60 | 23.41 | 0.11              | 0.00             | 99.10  | 0.944               |                  |                                 |
|                             | spinel               |            | 0.07             | 0.10             | 25.17                          | 42.52                          | 18.81                         | 0.23 | 0.08 | 12.76 | 0.01  | 0.01              | 0.00             | 99.76  | 0.583               | 0.531            | 0.015                           |
| 99112003                    | olivine              | 68.40      | 40.94            | 0.02             | 0.00                           | 0.03                           | 8.83                          | 0.14 | 0.35 | 50.58 | 0.00  | 0.00              | 0.00             | 100.90 | 0.911               |                  |                                 |
| Wadi Rajimi                 | opx                  | 28.44      | 56.39            | 0.02             | 1.29                           | 0.53                           | 5.58                          | 0.14 | 0.10 | 34.16 | 1.01  | 0.02              | 0.00             | 99.25  | 0.916               |                  |                                 |
| 0423.05 / 2718.37           | cpx                  | 1.83       | 54.01            | 0.02             | 1.33                           | 0.73                           | 1.94                          | 0.05 | 0.05 | 17.81 | 24.06 | 0.11              | 0.00             | 100.12 | 0.943               |                  |                                 |
|                             | spinel               | 0.75       | 0.09             | 0.07             | 18.52                          | 49.16                          | 20.81                         | 0.29 | 0.12 | 11.04 | 0.01  | 0.01              | 0.00             | 100.11 | 0.525               | 0.640            | 0.018                           |

<sup>a</sup>UTM coordinate (WGS84) = vertical / horizontal 1 km reference, 40R as grid zone designation, DN as 100 km<sup>2</sup> identification;

<sup>b</sup>Total Fe as FeO<sup>T</sup>: <sup>c</sup>Mg# = Mg / (Mg+Fe<sup>T</sup>) atomic ratio;

<sup>d</sup>For spinel. Mg# = Mg / (Mg+Fe<sup>2+</sup>). Cr# = Cr / (Cr+Al) and Fe<sup>3+</sup># = Fe<sup>3+</sup> / (Cr+Al+Fe<sup>3+</sup>) are calculated assuming spinel stoichiometry;

<sup>e</sup>Analytical results of olivine compositions by SEM-EDS.

**Appendix 1. Continued**

| Reference No.               | Mineral              | Mode (wt%) | SiO <sub>2</sub> | TiO <sub>2</sub> | Al <sub>2</sub> O <sub>3</sub> | Cr <sub>2</sub> O <sub>3</sub> | FeO <sup>T b</sup> | MnO  | NiO  | MgO   | CaO   | Na <sub>2</sub> O | K <sub>2</sub> O | Total  | Mg# <sup>c, d</sup> | Cr# <sup>d</sup> | Fe <sup>3+</sup> # <sup>d</sup> |
|-----------------------------|----------------------|------------|------------------|------------------|--------------------------------|--------------------------------|--------------------|------|------|-------|-------|-------------------|------------------|--------|---------------------|------------------|---------------------------------|
| UTM coordinate <sup>a</sup> |                      |            |                  |                  |                                |                                |                    |      |      |       |       |                   |                  |        |                     |                  |                                 |
| 99112101                    | olivine              |            | 40.65            | 0.04             | 0.00                           | 0.01                           | 8.25               | 0.08 | 0.36 | 50.18 | 0.00  | 0.00              | 0.00             | 99.58  | 0.916               |                  |                                 |
| Wadi Rajimi                 | opx                  |            | 57.16            | 0.02             | 1.80                           | 0.63                           | 5.48               | 0.13 | 0.09 | 33.91 | 0.84  | 0.01              | 0.00             | 100.05 | 0.917               |                  |                                 |
| 0422.26 / 2722.42           | cpx                  |            | 54.19            | 0.04             | 1.75                           | 0.80                           | 1.73               | 0.06 | 0.07 | 17.43 | 23.97 | 0.11              | 0.00             | 100.14 | 0.947               |                  |                                 |
|                             | spinel               |            | 0.15             | 0.04             | 22.61                          | 45.09                          | 18.86              | 0.25 | 0.07 | 12.73 | 0.01  | 0.02              | 0.00             | 99.82  | 0.587               | 0.572            | 0.017                           |
| 99112102                    | olivine              | 69.56      | 40.77            | 0.01             | 0.00                           | 0.01                           | 8.57               | 0.12 | 0.40 | 50.37 | 0.00  | 0.01              | 0.00             | 100.26 | 0.913               |                  |                                 |
| Wadi Rajimi                 | opx                  | 26.21      | 57.50            | 0.02             | 2.25                           | 0.74                           | 5.68               | 0.14 | 0.06 | 34.33 | 0.56  | 0.01              | 0.00             | 101.29 | 0.915               |                  |                                 |
| 0422.37 / 2722.05           | cpx                  | 2.84       | 54.55            | 0.04             | 2.18                           | 0.87                           | 1.86               | 0.07 | 0.03 | 17.46 | 24.26 | 0.03              | 0.00             | 101.35 | 0.944               |                  |                                 |
|                             | spinel               | 0.63       | 0.06             | 0.02             | 27.11                          | 40.61                          | 18.03              | 0.22 | 0.09 | 13.37 | 0.01  | 0.01              | 0.00             | 99.54  | 0.607               | 0.501            | 0.015                           |
| 99112103                    | olivine              |            | 41.30            | 0.03             | 0.02                           | 0.00                           | 8.29               | 0.09 | 0.40 | 50.65 | 0.01  | 0.00              | 0.00             | 100.79 | 0.916               |                  |                                 |
| Wadi Rajimi                 | opx                  |            | 57.81            | 0.03             | 1.81                           | 0.66                           | 5.28               | 0.12 | 0.06 | 34.50 | 0.87  | 0.01              | 0.00             | 101.15 | 0.921               |                  |                                 |
| 0422.05 / 2721.58           | cpx                  |            | –                | –                | –                              | –                              | –                  | –    | –    | –     | –     | –                 | –                | –      | –                   |                  |                                 |
|                             | spinel               |            | 0.10             | 0.06             | 22.86                          | 45.71                          | 18.50              | 0.23 | 0.11 | 12.82 | 0.01  | 0.02              | 0.00             | 100.42 | 0.600               | 0.573            | 0.015                           |
| 99112104                    | olivine <sup>c</sup> |            | 41.30            | –                | 0.00                           | 0.00                           | 8.30               | –    | –    | 50.65 | 0.01  | –                 | –                | 100.26 | 0.909               |                  |                                 |
| Wadi Rajimi                 | opx                  |            | 57.77            | 0.01             | 1.19                           | 0.55                           | 5.50               | 0.14 | 0.10 | 34.19 | 1.57  | 0.01              | 0.00             | 101.02 | 0.917               |                  |                                 |
| 0421.47 / 2721.32           | cpx                  |            | –                | –                | –                              | –                              | –                  | –    | –    | –     | –     | –                 | –                | –      | –                   |                  |                                 |
|                             | spinel               |            | 0.31             | 0.07             | 16.08                          | 51.97                          | 21.72              | 0.32 | 0.06 | 10.67 | 0.01  | 0.05              | 0.00             | 101.26 | 0.504               | 0.684            | 0.019                           |
| 99112105                    | olivine <sup>c</sup> |            | 41.43            | –                | 0.00                           | 0.00                           | 8.88               | –    | –    | 49.87 | 0.01  | –                 | –                | 100.18 | 0.909               |                  |                                 |
| Wadi Rajimi                 | opx                  |            | 57.92            | 0.00             | 1.09                           | 0.44                           | 5.33               | 0.13 | 0.06 | 34.16 | 1.58  | 0.02              | 0.00             | 100.73 | 0.920               |                  |                                 |
| 0421.58 / 2721.21           | cpx                  |            | –                | –                | –                              | –                              | –                  | –    | –    | –     | –     | –                 | –                | –      | –                   |                  |                                 |
|                             | spinel               |            | 0.10             | 0.04             | 16.34                          | 52.69                          | 20.82              | 0.28 | 0.06 | 11.30 | 0.01  | 0.00              | 0.00             | 101.63 | 0.533               | 0.684            | 0.019                           |
| 99112106                    | olivine <sup>c</sup> |            | 41.25            | –                | 0.00                           | 0.00                           | 8.81               | –    | –    | 48.87 | 0.02  | –                 | –                | 98.95  | 0.908               |                  |                                 |
| Wadi Rajimi                 | opx                  |            | 56.55            | 0.02             | 2.17                           | 0.63                           | 5.71               | 0.08 | 0.10 | 33.53 | 0.83  | 0.00              | 0.00             | 99.60  | 0.913               |                  |                                 |
| 0421.63 / 2720.68           | cpx                  |            | 53.16            | 0.04             | 2.47                           | 0.88                           | 1.88               | 0.07 | 0.06 | 16.81 | 24.13 | 0.02              | 0.00             | 99.50  | 0.941               |                  |                                 |
|                             | spinel               |            | 0.07             | 0.01             | 27.97                          | 39.74                          | 17.39              | 0.24 | 0.12 | 13.88 | 0.00  | 0.03              | 0.00             | 99.44  | 0.627               | 0.488            | 0.015                           |
| 99112108                    | olivine <sup>c</sup> | 71.28      | 41.30            | –                | 0.00                           | 0.00                           | 9.28               | –    | –    | 49.42 | 0.02  | –                 | –                | 100.03 | 0.905               |                  |                                 |
| Wadi Rajimi                 | opx                  | 22.74      | 57.17            | 0.02             | 2.56                           | 0.65                           | 5.63               | 0.13 | 0.09 | 34.16 | 0.57  | 0.02              | 0.00             | 101.01 | 0.915               |                  |                                 |
| 0421.58 / 2719.84           | cpx                  | 3.97       | 54.91            | 0.05             | 1.90                           | 0.46                           | 1.94               | 0.06 | 0.05 | 18.10 | 24.14 | 0.04              | 0.00             | 101.63 | 0.943               |                  |                                 |
|                             | spinel               | 0.74       | 0.24             | 0.05             | 31.21                          | 36.94                          | 18.10              | 0.22 | 0.10 | 14.14 | 0.00  | 0.02              | 0.00             | 101.02 | 0.617               | 0.443            | 0.014                           |
| 99112109                    | olivine              |            | 41.06            | 0.01             | 0.00                           | 0.02                           | 8.79               | 0.13 | 0.38 | 49.55 | 0.02  | 0.01              | 0.00             | 99.98  | 0.909               |                  |                                 |
| Wadi Rajimi                 | opx                  |            | 56.96            | 0.02             | 1.40                           | 0.41                           | 5.82               | 0.13 | 0.10 | 34.67 | 0.52  | 0.00              | 0.00             | 100.04 | 0.914               |                  |                                 |
| 0421.47 / 2719.32           | cpx                  |            | 53.76            | 0.02             | 1.63                           | 0.64                           | 1.89               | 0.05 | 0.04 | 17.86 | 23.81 | 0.10              | 0.00             | 99.80  | 0.944               |                  |                                 |
|                             | spinel               |            | 0.11             | 0.07             | 22.49                          | 44.46                          | 20.86              | 0.27 | 0.07 | 11.66 | 0.01  | 0.01              | 0.00             | 100.01 | 0.542               | 0.570            | 0.020                           |
| 99112111                    | olivine <sup>c</sup> |            | 41.98            | –                | 0.00                           | 0.00                           | 8.96               | –    | –    | 49.92 | 0.03  | –                 | –                | 100.89 | 0.909               |                  |                                 |
| Wadi Rajimi                 | opx                  |            | 56.98            | 0.01             | 1.64                           | 0.51                           | 5.53               | 0.12 | 0.06 | 33.76 | 1.24  | 0.01              | 0.00             | 99.87  | 0.916               |                  |                                 |
| 0421.53 / 2720.21           | cpx                  |            | 54.02            | 0.00             | 1.57                           | 0.57                           | 1.76               | 0.11 | 0.05 | 17.53 | 24.29 | 0.04              | 0.00             | 99.95  | 0.947               |                  |                                 |
|                             | spinel               |            | 0.08             | 0.02             | 22.06                          | 44.76                          | 19.90              | 0.26 | 0.10 | 12.28 | 0.01  | 0.01              | 0.00             | 99.48  | 0.573               | 0.576            | 0.022                           |

**Appendix 1. Continued**

| Reference No.               | Mineral              | Mode (wt%) | SiO <sub>2</sub> | TiO <sub>2</sub> | Al <sub>2</sub> O <sub>3</sub> | Cr <sub>2</sub> O <sub>3</sub> | FeO <sup>T b</sup> | MnO  | NiO  | MgO   | CaO   | Na <sub>2</sub> O | K <sub>2</sub> O | Total  | Mg# <sup>c, d</sup> | Cr# <sup>d</sup> | Fe <sup>3+</sup> # <sup>d</sup> |
|-----------------------------|----------------------|------------|------------------|------------------|--------------------------------|--------------------------------|--------------------|------|------|-------|-------|-------------------|------------------|--------|---------------------|------------------|---------------------------------|
| UTM coordinate <sup>a</sup> |                      |            |                  |                  |                                |                                |                    |      |      |       |       |                   |                  |        |                     |                  |                                 |
| 99112112                    | olivine <sup>c</sup> |            | 41.32            | –                | 0.00                           | 0.00                           | 9.09               | –    | –    | 49.04 | 0.01  | –                 | –                | 99.46  | 0.906               |                  |                                 |
| Wadi Rajimi                 | opx                  |            | 56.75            | 0.01             | 1.87                           | 0.60                           | 5.68               | 0.13 | 0.06 | 33.73 | 0.92  | 0.00              | 0.00             | 99.76  | 0.914               |                  |                                 |
| 0421.37 / 2721.68           | cpx                  |            | 53.60            | 0.01             | 2.11                           | 0.90                           | 1.80               | 0.06 | 0.05 | 17.08 | 24.34 | 0.03              | 0.00             | 99.98  | 0.944               |                  |                                 |
|                             | spinel               |            | 0.04             | 0.04             | 22.50                          | 44.90                          | 19.76              | 0.30 | 0.08 | 12.32 | 0.01  | 0.00              | 0.00             | 99.94  | 0.573               | 0.572            | 0.020                           |
| 99112301                    | olivine              |            | 40.55            | 0.01             | 0.00                           | 0.02                           | 8.83               | 0.11 | 0.43 | 50.22 | 0.00  | 0.00              | 0.00             | 100.18 | 0.910               |                  |                                 |
| Wadi Rajimi                 | opx                  |            | 56.76            | 0.04             | 2.82                           | 0.72                           | 5.67               | 0.11 | 0.06 | 33.35 | 1.29  | 0.00              | 0.00             | 100.82 | 0.913               |                  |                                 |
| 0423.37 / 2719.68           | cpx                  |            | –                | –                | –                              | –                              | –                  | –    | –    | –     | –     | –                 | –                | –      |                     |                  |                                 |
|                             | spinel               |            | 0.03             | 0.06             | 35.66                          | 31.91                          | 16.46              | 0.18 | 0.18 | 15.24 | 0.01  | 0.01              | 0.00             | 99.73  | 0.660               | 0.375            | 0.014                           |
| 99112302                    | olivine <sup>c</sup> |            | 41.32            | –                | 0.00                           | 0.00                           | 9.32               | –    | –    | 49.04 | 0.01  | –                 | –                | 99.68  | 0.910               |                  |                                 |
| Wadi Rajimi                 | opx                  |            | 56.83            | 0.03             | 2.38                           | 0.60                           | 5.36               | 0.12 | 0.09 | 33.94 | 1.13  | 0.01              | 0.00             | 100.47 | 0.919               |                  |                                 |
| 0423.16 / 2719.21           | cpx                  |            | 54.67            | 0.05             | 2.27                           | 0.82                           | 1.77               | 0.02 | 0.05 | 17.53 | 24.09 | 0.06              | 0.01             | 101.33 | 0.946               |                  |                                 |
|                             | spinel               |            | 0.23             | 0.06             | 30.69                          | 36.70                          | 17.48              | 0.24 | 0.15 | 14.05 | 0.03  | 0.03              | 0.00             | 99.66  | 0.622               | 0.445            | 0.013                           |
| 99112303                    | olivine              |            | 41.02            | 0.03             | 0.05                           | 0.02                           | 9.11               | 0.11 | 0.38 | 50.11 | 0.03  | 0.00              | 0.00             | 100.86 | 0.907               |                  |                                 |
| Wadi Rajimi                 | opx                  |            | 57.15            | 0.03             | 2.38                           | 0.60                           | 5.97               | 0.13 | 0.09 | 33.89 | 0.54  | 0.01              | 0.00             | 100.80 | 0.910               |                  |                                 |
| 0423.00 / 2718.68           | cpx                  |            | 54.18            | 0.08             | 1.97                           | 0.54                           | 1.83               | 0.11 | 0.03 | 17.31 | 24.22 | 0.03              | 0.00             | 100.32 | 0.944               |                  |                                 |
|                             | spinel               |            | 0.02             | 0.06             | 30.44                          | 37.74                          | 17.37              | 0.21 | 0.10 | 14.27 | 0.01  | 0.02              | 0.00             | 100.23 | 0.631               | 0.454            | 0.014                           |
| 99112304                    | olivine              | 77.31      | 41.24            | 0.01             | 0.00                           | 0.02                           | 8.54               | 0.12 | 0.35 | 50.36 | 0.04  | 0.00              | 0.00             | 100.68 | 0.913               |                  |                                 |
| Wadi Rajimi                 | opx                  | 20.17      | 57.96            | 0.02             | 1.05                           | 0.43                           | 5.48               | 0.12 | 0.07 | 34.45 | 1.21  | 0.00              | 0.00             | 100.79 | 0.918               |                  |                                 |
| 0423.16 / 2718.21           | cpx                  | 0.37       | 55.37            | 0.04             | 1.08                           | 0.59                           | 1.93               | 0.07 | 0.05 | 17.98 | 23.80 | 0.19              | 0.00             | 101.11 | 0.943               |                  |                                 |
|                             | spinel               | 0.97       | 0.42             | 0.11             | 15.30                          | 51.53                          | 21.56              | 0.31 | 0.07 | 10.74 | 0.05  | 0.01              | 0.00             | 100.11 | 0.512               | 0.693            | 0.021                           |
| 99112306                    | olivine              |            | 40.93            | 0.03             | 0.00                           | 0.00                           | 8.70               | 0.12 | 0.37 | 49.77 | 0.04  | 0.01              | 0.00             | 99.96  | 0.911               |                  |                                 |
| Wadi Rajimi                 | opx                  |            | 57.79            | 0.01             | 1.51                           | 0.49                           | 5.63               | 0.12 | 0.10 | 34.16 | 0.72  | 0.00              | 0.00             | 100.53 | 0.915               |                  |                                 |
| 0422.63 / 2718.11           | cpx                  |            | 54.72            | 0.02             | 1.39                           | 0.55                           | 1.92               | 0.08 | 0.04 | 17.65 | 23.69 | 0.04              | 0.00             | 100.10 | 0.943               |                  |                                 |
|                             | spinel               |            | 0.15             | 0.06             | 20.71                          | 45.89                          | 20.69              | 0.31 | 0.06 | 11.61 | 0.01  | 0.00              | 0.00             | 99.48  | 0.545               | 0.598            | 0.021                           |
| 99112307                    | olivine              | 76.00      | 40.67            | 0.01             | 0.01                           | 0.01                           | 8.77               | 0.11 | 0.36 | 49.69 | 0.02  | 0.00              | 0.00             | 99.66  | 0.910               |                  |                                 |
| Wadi Rajimi                 | opx                  | 20.42      | 57.82            | 0.01             | 1.25                           | 0.42                           | 5.67               | 0.11 | 0.09 | 34.17 | 0.66  | 0.01              | 0.00             | 100.21 | 0.915               |                  |                                 |
| 0422.00 / 2717.84           | cpx                  | 2.32       | 54.95            | 0.04             | 1.29                           | 0.68                           | 1.83               | 0.08 | 0.05 | 17.70 | 23.66 | 0.16              | 0.00             | 100.43 | 0.945               |                  |                                 |
|                             | spinel               | 1.03       | 0.24             | 0.06             | 17.46                          | 49.55                          | 21.49              | 0.28 | 0.08 | 11.21 | 0.01  | 0.01              | 0.00             | 100.40 | 0.530               | 0.656            | 0.023                           |
| 99112308                    | olivine              |            | 41.07            | 0.00             | 0.00                           | 0.01                           | 8.63               | 0.10 | 0.36 | 50.98 | 0.02  | 0.00              | 0.00             | 101.18 | 0.913               |                  |                                 |
| Wadi Rajimi                 | opx                  |            | 57.89            | 0.02             | 1.76                           | 0.67                           | 5.11               | 0.12 | 0.11 | 33.97 | 1.53  | 0.01              | 0.00             | 101.18 | 0.922               |                  |                                 |
| 0424.11 / 2721.84           | cpx                  |            | 54.86            | 0.05             | 1.65                           | 0.84                           | 1.75               | 0.05 | 0.04 | 17.59 | 23.92 | 0.16              | 0.00             | 100.92 | 0.947               |                  |                                 |
|                             | spinel               |            | 0.07             | 0.05             | 23.59                          | 45.48                          | 18.16              | 0.23 | 0.06 | 12.90 | 0.01  | 0.01              | 0.00             | 100.56 | 0.589               | 0.564            | 0.012                           |
| 99112309                    | olivine              |            | 40.82            | 0.00             | 0.01                           | 0.02                           | 8.16               | 0.13 | 0.40 | 50.52 | 0.02  | 0.00              | 0.00             | 100.08 | 0.917               |                  |                                 |
| Wadi Rajimi                 | opx                  |            | 58.53            | 0.01             | 1.18                           | 0.46                           | 5.30               | 0.13 | 0.09 | 34.46 | 1.22  | 0.02              | 0.00             | 101.39 | 0.921               |                  |                                 |
| 0424.26 / 2721.32           | cpx                  |            | –                | –                | –                              | –                              | –                  | –    | –    | –     | –     | –                 | –                | –      |                     |                  |                                 |
|                             | spinel               |            | 0.03             | 0.07             | 17.49                          | 49.95                          | 21.48              | 0.32 | 0.04 | 10.26 | 0.01  | 0.01              | 0.00             | 99.65  | 0.494               | 0.657            | 0.017                           |

**Appendix 1. Continued**

| Reference No.     | Mineral              | Mode (wt%) | SiO <sub>2</sub> | TiO <sub>2</sub> | Al <sub>2</sub> O <sub>3</sub> | Cr <sub>2</sub> O <sub>3</sub> | FeO <sup>T b</sup> | MnO  | NiO  | MgO   | CaO   | Na <sub>2</sub> O | K <sub>2</sub> O | Total  | Mg# <sup>c, d</sup> | Cr# <sup>d</sup> | Fe <sup>3+</sup> # <sup>d</sup> |
|-------------------|----------------------|------------|------------------|------------------|--------------------------------|--------------------------------|--------------------|------|------|-------|-------|-------------------|------------------|--------|---------------------|------------------|---------------------------------|
| 99112310          | olivine <sup>c</sup> | 76.39      | 41.63            | –                | 0.00                           | 0.00                           | 9.07               | –    | –    | 50.31 | 0.20  | –                 | –                | 101.20 | 0.907               |                  |                                 |
| Wadi Rajimi       | opx                  | 20.38      | 57.69            | 0.02             | 1.38                           | 0.54                           | 5.58               | 0.12 | 0.09 | 35.20 | 0.49  | 0.03              | 0.00             | 101.14 | 0.918               |                  |                                 |
| 0424.74 / 2721.00 | cpx                  | 1.09       | 55.16            | 0.02             | 1.03                           | 0.47                           | 1.82               | 0.09 | 0.06 | 18.39 | 24.05 | 0.11              | 0.00             | 101.19 | 0.948               |                  |                                 |
|                   | spinel               | 0.61       | 0.32             | 0.07             | 19.64                          | 47.96                          | 20.60              | 0.28 | 0.04 | 12.11 | 0.02  | 0.04              | 0.00             | 101.08 | 0.559               | 0.621            | 0.021                           |
| 99112311          | olivine              |            | 40.83            | 0.02             | 0.01                           | 0.01                           | 8.65               | 0.10 | 0.35 | 50.17 | 0.02  | 0.00              | 0.00             | 100.17 | 0.912               |                  |                                 |
| Wadi Rajimi       | opx                  |            | 57.66            | 0.01             | 1.80                           | 0.59                           | 5.57               | 0.11 | 0.09 | 34.36 | 0.79  | 0.01              | 0.00             | 100.98 | 0.917               |                  |                                 |
| 0425.58 / 2720.79 | cpx                  |            | 54.43            | 0.03             | 2.02                           | 0.87                           | 1.98               | 0.06 | 0.04 | 17.67 | 23.91 | 0.02              | 0.00             | 101.02 | 0.941               |                  |                                 |
|                   | spinel               |            | 0.11             | 0.04             | 23.61                          | 44.69                          | 18.58              | 0.26 | 0.10 | 12.70 | 0.01  | 0.03              | 0.00             | 100.13 | 0.583               | 0.559            | 0.014                           |
| 99112401          | olivine              |            | 40.80            | 0.01             | 0.00                           | 0.03                           | 8.54               | 0.11 | 0.34 | 50.31 | 0.04  | 0.00              | 0.00             | 100.18 | 0.913               |                  |                                 |
| Wadi Rajimi       | opx                  |            | 56.31            | 0.01             | 2.08                           | 0.71                           | 5.73               | 0.13 | 0.06 | 34.04 | 1.14  | 0.01              | 0.00             | 100.21 | 0.914               |                  |                                 |
| 0424.37 / 2724.63 | cpx                  |            | 52.69            | 0.04             | 2.57                           | 0.88                           | 1.85               | 0.08 | 0.09 | 17.06 | 24.50 | 0.04              | 0.00             | 99.81  | 0.943               |                  |                                 |
|                   | spinel               |            | 0.07             | 0.04             | 27.25                          | 39.84                          | 19.04              | 0.24 | 0.10 | 13.42 | 0.01  | 0.00              | 0.00             | 100.01 | 0.606               | 0.495            | 0.020                           |
| 99112402          | olivine              |            | 40.90            | 0.00             | 0.00                           | 0.02                           | 8.35               | 0.12 | 0.38 | 50.98 | 0.02  | 0.01              | 0.00             | 100.79 | 0.916               |                  |                                 |
| Wadi Rajimi       | opx                  |            | –                | –                | –                              | –                              | –                  | –    | –    | –     | –     | –                 | –                | –      | –                   |                  |                                 |
| 0424.37 / 2724.16 | cpx                  |            | 55.02            | 0.07             | 1.53                           | 0.53                           | 1.78               | 0.06 | 0.04 | 17.91 | 24.58 | 0.05              | 0.00             | 101.57 | 0.947               |                  |                                 |
|                   | spinel               |            | 0.02             | 0.06             | 26.55                          | 40.87                          | 19.79              | 0.23 | 0.14 | 13.58 | 0.00  | 0.00              | 0.00             | 101.25 | 0.609               | 0.508            | 0.025                           |
| 99112403          | olivine              |            | 41.13            | 0.00             | 0.00                           | 0.02                           | 8.25               | 0.13 | 0.36 | 50.91 | 0.00  | 0.01              | 0.00             | 100.81 | 0.917               |                  |                                 |
| Wadi Rajimi       | opx                  |            | 56.55            | 0.01             | 2.23                           | 0.50                           | 5.58               | 0.13 | 0.04 | 34.40 | 0.83  | 0.01              | 0.00             | 100.28 | 0.917               |                  |                                 |
| 0424.63 / 2723.58 | cpx                  |            | 52.92            | 0.07             | 3.18                           | 1.36                           | 1.87               | 0.08 | 0.04 | 16.86 | 24.17 | 0.15              | 0.00             | 100.70 | 0.941               |                  |                                 |
|                   | spinel               |            | 0.04             | 0.04             | 31.45                          | 37.56                          | 17.05              | 0.20 | 0.10 | 14.90 | 0.00  | 0.03              | 0.00             | 101.36 | 0.648               | 0.445            | 0.015                           |
| 99112404          | olivine <sup>c</sup> |            | 41.43            | –                | 0.00                           | 0.00                           | 8.73               | –    | –    | 49.63 | 0.02  | –                 | –                | 99.81  | 0.910               |                  |                                 |
| Wadi Rajimi       | opx                  |            | 56.39            | 0.01             | 2.31                           | 0.62                           | 5.80               | 0.12 | 0.08 | 33.42 | 1.18  | 0.00              | 0.00             | 99.93  | 0.911               |                  |                                 |
| 0424.74 / 2723.00 | cpx                  |            | 53.24            | 0.05             | 2.48                           | 0.88                           | 2.03               | 0.07 | 0.05 | 17.04 | 23.71 | 0.04              | 0.01             | 99.61  | 0.937               |                  |                                 |
|                   | spinel               |            | 0.23             | 0.07             | 28.42                          | 38.32                          | 18.53              | 0.21 | 0.12 | 13.44 | 0.00  | 0.02              | 0.00             | 99.37  | 0.603               | 0.475            | 0.016                           |
| 99112405          | olivine              | 69.98      | 41.66            | 0.01             | 0.00                           | 0.02                           | 9.03               | 0.13 | 0.36 | 50.26 | 0.02  | 0.00              | 0.00             | 101.50 | 0.908               |                  |                                 |
| Wadi Rajimi       | opx                  | 22.50      | 57.33            | 0.02             | 1.59                           | 0.54                           | 5.92               | 0.14 | 0.11 | 34.31 | 0.70  | 0.01              | 0.00             | 100.66 | 0.912               |                  |                                 |
| 0424.74 / 2723.00 | cpx                  | 4.89       | 54.03            | 0.06             | 1.60                           | 0.72                           | 2.00               | 0.07 | 0.04 | 17.78 | 23.74 | 0.04              | 0.00             | 100.09 | 0.941               |                  |                                 |
|                   | spinel               | 0.90       | 0.07             | 0.07             | 20.34                          | 47.33                          | 20.85              | 0.24 | 0.08 | 11.60 | 0.01  | 0.00              | 0.00             | 100.60 | 0.542               | 0.609            | 0.020                           |
| 99112406          | olivine              |            | 41.79            | 0.00             | 0.01                           | 0.01                           | 8.33               | 0.09 | 0.35 | 50.76 | 0.01  | 0.00              | 0.00             | 101.34 | 0.916               |                  |                                 |
| Wadi Rajimi       | opx                  |            | 56.68            | 0.05             | 2.16                           | 0.68                           | 5.29               | 0.11 | 0.10 | 34.18 | 1.06  | 0.00              | 0.00             | 100.31 | 0.920               |                  |                                 |
| 0425.16 / 2722.58 | cpx                  |            | 53.44            | 0.11             | 2.23                           | 0.99                           | 1.79               | 0.05 | 0.04 | 17.37 | 23.98 | 0.11              | 0.01             | 100.11 | 0.945               |                  |                                 |
|                   | spinel               |            | 0.07             | 0.13             | 26.79                          | 41.72                          | 18.11              | 0.25 | 0.06 | 13.60 | 0.01  | 0.01              | 0.00             | 100.75 | 0.609               | 0.511            | 0.015                           |
| 99112407          | olivine              | 73.44      | 42.49            | 0.02             | 0.00                           | 0.02                           | 9.00               | 0.12 | 0.39 | 51.58 | 0.04  | 0.01              | 0.00             | 103.66 | 0.911               |                  |                                 |
| Wadi Rajimi       | opx                  | 17.70      | 57.14            | 0.01             | 2.21                           | 0.72                           | 5.76               | 0.14 | 0.07 | 34.47 | 0.58  | 0.00              | 0.00             | 101.11 | 0.914               |                  |                                 |
| 0425.53 / 2722.32 | cpx                  | 3.91       | 54.02            | 0.03             | 2.55                           | 1.07                           | 2.01               | 0.08 | 0.07 | 17.37 | 23.95 | 0.06              | 0.02             | 101.23 | 0.939               |                  |                                 |
|                   | spinel               | 0.84       | 0.06             | 0.09             | 27.16                          | 41.57                          | 19.09              | 0.25 | 0.10 | 13.58 | 0.02  | 0.01              | 0.00             | 101.93 | 0.603               | 0.507            | 0.018                           |

**Appendix 1. Continued**

| Reference No.               | Mineral              | Mode (wt%) | SiO <sub>2</sub> | TiO <sub>2</sub> | Al <sub>2</sub> O <sub>3</sub> | Cr <sub>2</sub> O <sub>3</sub> | FeO <sup>T b</sup> | MnO  | NiO  | MgO   | CaO   | Na <sub>2</sub> O | K <sub>2</sub> O | Total  | Mg# <sup>c, d</sup> | Cr# <sup>d</sup> | Fe <sup>3+</sup> # <sup>d</sup> |
|-----------------------------|----------------------|------------|------------------|------------------|--------------------------------|--------------------------------|--------------------|------|------|-------|-------|-------------------|------------------|--------|---------------------|------------------|---------------------------------|
| UTM coordinate <sup>a</sup> |                      |            |                  |                  |                                |                                |                    |      |      |       |       |                   |                  |        |                     |                  |                                 |
| 99112408                    | olivine              |            | 40.72            | 0.01             | 0.02                           | 0.02                           | 8.81               | 0.11 | 0.35 | 49.76 | 0.01  | 0.01              | 0.00             | 99.81  | 0.910               |                  |                                 |
| Wadi Rajimi                 | opx                  |            | 57.17            | 0.02             | 2.04                           | 0.59                           | 5.80               | 0.10 | 0.07 | 34.30 | 0.61  | 0.02              | 0.01             | 100.74 | 0.913               |                  |                                 |
| 0425.89 / 2722.00           | cpx                  |            | 53.82            | 0.05             | 2.66                           | 1.19                           | 2.08               | 0.07 | 0.04 | 17.35 | 23.81 | 0.07              | 0.00             | 101.15 | 0.937               |                  |                                 |
|                             | spinel               |            | 0.04             | 0.06             | 26.84                          | 41.62                          | 18.28              | 0.23 | 0.09 | 13.45 | 0.01  | 0.01              | 0.00             | 100.62 | 0.605               | 0.510            | 0.015                           |
| 99112409                    | olivine              |            | 42.10            | 0.01             | 0.01                           | 0.02                           | 8.42               | 0.12 | 0.33 | 50.91 | 0.02  | 0.00              | 0.00             | 101.94 | 0.915               |                  |                                 |
| Wadi Rajimi                 | opx                  |            | 57.22            | 0.03             | 1.83                           | 0.57                           | 5.61               | 0.11 | 0.07 | 34.33 | 0.95  | 0.00              | 0.00             | 100.73 | 0.916               |                  |                                 |
| 0426.16 / 2721.16           | cpx                  |            | –                | –                | –                              | –                              | –                  | –    | –    | –     | –     | –                 | –                | –      |                     |                  |                                 |
|                             | spinel               |            | 0.02             | 0.07             | 23.93                          | 43.95                          | 19.00              | 0.24 | 0.10 | 12.93 | 0.00  | 0.02              | 0.00             | 100.26 | 0.593               | 0.552            | 0.019                           |
| 99112501                    | olivine              |            | 41.78            | 0.01             | 0.00                           | 0.01                           | 8.77               | 0.08 | 0.39 | 50.23 | 0.02  | 0.00              | 0.00             | 101.28 | 0.911               |                  |                                 |
| Wadi Rajimi                 | opx                  |            | 56.46            | 0.03             | 2.11                           | 0.58                           | 5.67               | 0.11 | 0.08 | 33.16 | 2.11  | 0.01              | 0.00             | 100.32 | 0.912               |                  |                                 |
| 0424.89 / 2725.26           | cpx                  |            | 53.29            | 0.08             | 2.32                           | 0.70                           | 1.91               | 0.06 | 0.04 | 17.16 | 23.70 | 0.12              | 0.00             | 99.38  | 0.941               |                  |                                 |
|                             | spinel               |            | 0.06             | 0.05             | 27.39                          | 38.95                          | 20.42              | 0.24 | 0.13 | 13.23 | 0.02  | 0.02              | 0.00             | 100.52 | 0.596               | 0.488            | 0.026                           |
| 99112503                    | olivine              | 78.12      | 41.42            | 0.01             | 0.00                           | 0.01                           | 9.45               | 0.14 | 0.35 | 50.00 | 0.01  | 0.00              | 0.00             | 101.39 | 0.904               |                  |                                 |
| Wadi Rajimi                 | opx                  | 18.91      | 57.41            | 0.02             | 0.90                           | 0.43                           | 5.98               | 0.13 | 0.06 | 34.01 | 1.13  | 0.01              | 0.00             | 100.08 | 0.910               |                  |                                 |
| 0424.89 / 2724.79           | cpx                  | 1.27       | 54.79            | 0.02             | 0.70                           | 0.35                           | 1.93               | 0.05 | 0.08 | 17.62 | 23.94 | 0.21              | 0.00             | 99.68  | 0.942               |                  |                                 |
|                             | spinel               | 0.46       | 0.06             | 0.16             | 13.60                          | 53.11                          | 23.26              | 0.32 | 0.06 | 9.31  | 0.01  | 0.00              | 0.00             | 99.88  | 0.457               | 0.724            | 0.022                           |
| 99112504                    | olivine <sup>e</sup> |            | 41.63            | –                | 0.00                           | 0.00                           | 9.09               | –    | –    | 50.51 | 0.03  | –                 | –                | 101.25 | 0.907               |                  |                                 |
| Wadi Rajimi                 | opx                  |            | 55.18            | 0.02             | 2.07                           | 0.59                           | 5.74               | 0.12 | 0.07 | 34.90 | 1.46  | 0.01              | 0.00             | 100.16 | 0.915               |                  |                                 |
| 0425.42 / 2724.42           | cpx                  |            | 53.05            | 0.02             | 2.22                           | 0.76                           | 1.91               | 0.07 | 0.05 | 17.90 | 24.45 | 0.06              | 0.00             | 100.49 | 0.944               |                  |                                 |
|                             | spinel               |            | –                | –                | –                              | –                              | –                  | –    | –    | –     | –     | –                 | –                | –      |                     |                  |                                 |
| 99112505                    | olivine              |            | 41.74            | 0.01             | 0.00                           | 0.00                           | 8.84               | 0.12 | 0.37 | 50.60 | 0.01  | 0.00              | 0.00             | 101.71 | 0.911               |                  |                                 |
| Wadi Rajimi                 | opx                  |            | 57.89            | 0.00             | 1.59                           | 0.58                           | 5.29               | 0.13 | 0.05 | 34.09 | 1.47  | 0.00              | 0.00             | 101.09 | 0.920               |                  |                                 |
| 0425.84 / 2724.21           | cpx                  |            | 54.79            | 0.01             | 1.99                           | 0.92                           | 2.33               | 0.05 | 0.04 | 19.50 | 21.35 | 0.12              | 0.00             | 101.12 | 0.939               |                  |                                 |
|                             | spinel               |            | 0.03             | 0.06             | 21.34                          | 46.61                          | 20.16              | 0.24 | 0.06 | 12.05 | 0.01  | 0.01              | 0.00             | 100.57 | 0.559               | 0.594            | 0.019                           |
| 99112506                    | olivine              |            | 41.49            | 0.02             | 0.01                           | 0.01                           | 7.85               | 0.11 | 0.39 | 51.11 | 0.03  | 0.01              | 0.00             | 101.01 | 0.921               |                  |                                 |
| Wadi Rajimi                 | opx                  |            | 56.35            | 0.10             | 2.59                           | 0.69                           | 5.22               | 0.09 | 0.06 | 34.67 | 0.75  | 0.00              | 0.00             | 100.54 | 0.922               |                  |                                 |
| 0426.05 / 2723.63           | cpx                  |            | 53.14            | 0.14             | 2.91                           | 1.10                           | 1.75               | 0.05 | 0.01 | 17.38 | 24.25 | 0.06              | 0.00             | 100.78 | 0.947               |                  |                                 |
|                             | spinel               |            | 0.04             | 0.08             | 29.61                          | 38.82                          | 17.00              | 0.21 | 0.12 | 14.75 | 0.01  | 0.01              | 0.00             | 100.64 | 0.651               | 0.468            | 0.016                           |
| 99112507                    | olivine <sup>e</sup> |            | 41.35            | –                | 0.00                           | 0.00                           | 9.02               | –    | –    | 49.96 | 0.04  | –                 | –                | 100.35 | 0.907               |                  |                                 |
| Wadi Rajimi                 | opx                  |            | 56.92            | 0.01             | 2.41                           | 0.73                           | 5.62               | 0.10 | 0.11 | 34.65 | 0.92  | 0.00              | 0.00             | 101.47 | 0.917               |                  |                                 |
| 0426.16 / 2723.21           | cpx                  |            | –                | –                | –                              | –                              | –                  | –    | –    | –     | –     | –                 | –                | –      |                     |                  |                                 |
|                             | spinel               |            | 0.06             | 0.03             | 29.38                          | 38.57                          | 18.48              | 0.20 | 0.10 | 14.18 | 0.00  | 0.01              | 0.00             | 101.01 | 0.626               | 0.468            | 0.019                           |
| 99112508                    | olivine              |            | 41.63            | 0.00             | 0.00                           | 0.00                           | 9.16               | 0.11 | 0.35 | 50.43 | 0.02  | 0.00              | 0.00             | 101.71 | 0.908               |                  |                                 |
| Wadi Rajimi                 | opx                  |            | 56.44            | 0.02             | 2.20                           | 0.60                           | 5.82               | 0.12 | 0.06 | 33.92 | 0.94  | 0.00              | 0.00             | 100.12 | 0.912               |                  |                                 |
| 0426.58 / 2722.84           | cpx                  |            | 53.72            | 0.08             | 2.44                           | 0.99                           | 1.94               | 0.04 | 0.03 | 17.24 | 24.36 | 0.08              | 0.00             | 100.93 | 0.941               |                  |                                 |
|                             | spinel               |            | 0.07             | 0.08             | 27.78                          | 40.28                          | 19.05              | 0.23 | 0.11 | 13.39 | 0.01  | 0.01              | 0.00             | 101.01 | 0.598               | 0.493            | 0.017                           |

**Appendix 1. Continued**

| Reference No.     | Mineral              | Mode (wt%) | SiO <sub>2</sub> | TiO <sub>2</sub> | Al <sub>2</sub> O <sub>3</sub> | Cr <sub>2</sub> O <sub>3</sub> | FeO <sup>T+b</sup> | MnO  | NiO  | MgO   | CaO   | Na <sub>2</sub> O | K <sub>2</sub> O | Total  | Mg# <sup>c, d</sup> | Cr# <sup>d</sup> | Fe <sup>3+</sup> # <sup>d</sup> |
|-------------------|----------------------|------------|------------------|------------------|--------------------------------|--------------------------------|--------------------|------|------|-------|-------|-------------------|------------------|--------|---------------------|------------------|---------------------------------|
| 99112509          | olivine              |            | 42.37            | 0.01             | 0.00                           | 0.01                           | 8.75               | 0.12 | 0.43 | 50.69 | 0.03  | 0.00              | 0.00             | 102.41 | 0.912               |                  |                                 |
| Wadi Rajimi       | opx                  |            | 56.95            | 0.03             | 2.19                           | 0.66                           | 5.83               | 0.13 | 0.09 | 34.61 | 0.63  | 0.00              | 0.00             | 101.12 | 0.914               |                  |                                 |
| 0426.63 / 2722.26 | cpx                  |            | 52.74            | 0.05             | 2.73                           | 1.04                           | 2.09               | 0.07 | 0.03 | 17.38 | 23.34 | 0.02              | 0.00             | 99.50  | 0.937               |                  |                                 |
|                   | spinel               |            | 0.06             | 0.07             | 27.15                          | 40.98                          | 19.01              | 0.23 | 0.07 | 13.69 | 0.02  | 0.01              | 0.00             | 101.29 | 0.610               | 0.503            | 0.020                           |
| 99112510          | olivine <sup>e</sup> | 76.77      | 41.16            | –                | 0.00                           | 0.00                           | 9.33               | –    | –    | 48.95 | 0.05  | –                 | –                | 99.50  | 0.905               |                  |                                 |
| Wadi Rajimi       | opx                  | 19.38      | 56.73            | 0.00             | 1.96                           | 0.58                           | 5.58               | 0.12 | 0.10 | 34.49 | 0.61  | 0.02              | 0.00             | 100.20 | 0.917               |                  |                                 |
| 0426.68 / 2721.68 | cpx                  | 3.50       | 53.76            | 0.05             | 0.81                           | 0.35                           | 1.88               | 0.07 | 0.04 | 17.42 | 23.96 | 0.06              | 0.00             | 100.74 | 0.943               |                  |                                 |
|                   | spinel               | 0.53       | 0.21             | 0.05             | 25.75                          | 42.54                          | 18.03              | 0.23 | 0.08 | 13.28 | 0.00  | 0.02              | 0.00             | 100.18 | 0.599               | 0.526            | 0.013                           |
| 99112701          | olivine              |            | 41.47            | 0.02             | 0.01                           | 0.03                           | 8.39               | 0.10 | 0.34 | 50.79 | 0.02  | 0.00              | 0.00             | 101.17 | 0.915               |                  |                                 |
| RAYY              | opx                  |            | 58.06            | 0.03             | 2.06                           | 0.63                           | 5.46               | 0.09 | 0.09 | 34.55 | 0.65  | 0.00              | 0.00             | 101.63 | 0.919               |                  |                                 |
| 0426.84 / 2711.79 | cpx                  |            | –                | –                | –                              | –                              | –                  | –    | –    | –     | –     | –                 | –                | –      | –                   |                  |                                 |
|                   | spinel               |            | 0.07             | 0.07             | 25.45                          | 43.14                          | 18.43              | 0.22 | 0.09 | 13.38 | 0.03  | 0.01              | 0.00             | 100.88 | 0.603               | 0.532            | 0.016                           |
| 99112702          | olivine <sup>e</sup> | 73.53      | 41.55            | –                | 0.00                           | 0.00                           | 8.89               | –    | –    | 50.02 | 0.04  | –                 | –                | 100.49 | 0.908               |                  |                                 |
| RAYY              | opx                  | 21.75      | 57.49            | 0.01             | 1.30                           | 0.47                           | 5.54               | 0.13 | 0.11 | 34.55 | 1.04  | 0.01              | 0.00             | 100.66 | 0.917               |                  |                                 |
| 0426.79 / 2712.84 | cpx                  | 2.77       | 54.56            | 0.07             | 1.47                           | 0.66                           | 1.90               | 0.04 | 0.05 | 18.04 | 24.16 | 0.05              | 0.01             | 101.01 | 0.944               |                  |                                 |
|                   | spinel               | 0.53       | 0.15             | 0.08             | 17.73                          | 50.02                          | 20.28              | 0.25 | 0.06 | 11.32 | 0.00  | 0.01              | 0.00             | 99.89  | 0.537               | 0.654            | 0.017                           |
| 99112703          | olivine              | 74.66      | 41.55            | 0.01             | 0.00                           | 0.01                           | 8.47               | 0.12 | 0.38 | 50.63 | 0.03  | 0.01              | 0.00             | 101.22 | 0.914               |                  |                                 |
| RAYY              | opx                  | 20.68      | 58.21            | 0.02             | 1.69                           | 0.49                           | 5.47               | 0.14 | 0.07 | 34.60 | 0.72  | 0.00              | 0.00             | 101.40 | 0.919               |                  |                                 |
| 0426.11 / 2714.16 | cpx                  | 2.17       | 55.12            | 0.02             | 1.65                           | 0.61                           | 1.89               | 0.11 | 0.04 | 18.12 | 23.21 | 0.03              | 0.01             | 100.82 | 0.945               |                  |                                 |
|                   | spinel               | 0.83       | 0.05             | 0.03             | 23.48                          | 45.11                          | 18.74              | 0.25 | 0.07 | 12.59 | 0.01  | 0.01              | 0.00             | 100.33 | 0.579               | 0.563            | 0.014                           |
| 99112704          | olivine              | 73.40      | 41.18            | 0.00             | 0.00                           | 0.02                           | 8.39               | 0.08 | 0.35 | 51.17 | 0.01  | 0.00              | 0.00             | 101.21 | 0.916               |                  |                                 |
| RAYY              | opx                  | 22.64      | 57.72            | 0.03             | 2.34                           | 0.67                           | 5.46               | 0.12 | 0.05 | 34.34 | 0.83  | 0.01              | 0.00             | 101.57 | 0.918               |                  |                                 |
| 0425.47 / 2714.68 | cpx                  | 1.94       | 55.14            | 0.05             | 2.04                           | 0.64                           | 1.94               | 0.05 | 0.03 | 17.80 | 23.89 | 0.07              | 0.01             | 101.67 | 0.942               |                  |                                 |
|                   | spinel               | 0.70       | 0.06             | 0.08             | 29.41                          | 39.24                          | 16.66              | 0.19 | 0.15 | 14.61 | 0.02  | 0.00              | 0.00             | 100.42 | 0.647               | 0.472            | 0.014                           |
| 99112705          | olivine              |            | 41.02            | 0.00             | 0.00                           | 0.00                           | 8.76               | 0.11 | 0.39 | 50.75 | 0.01  | 0.00              | 0.00             | 101.03 | 0.912               |                  |                                 |
| RAYY              | opx                  |            | 57.60            | 0.01             | 1.83                           | 0.60                           | 5.67               | 0.13 | 0.09 | 34.40 | 0.78  | 0.01              | 0.00             | 101.11 | 0.915               |                  |                                 |
| 0425.84 / 2715.16 | cpx                  |            | 54.06            | 0.02             | 1.87                           | 0.68                           | 1.93               | 0.05 | 0.07 | 17.85 | 23.65 | 0.06              | 0.00             | 100.23 | 0.943               |                  |                                 |
|                   | spinel               |            | 0.04             | 0.04             | 24.42                          | 44.54                          | 18.19              | 0.23 | 0.09 | 12.90 | 0.01  | 0.00              | 0.00             | 100.45 | 0.589               | 0.550            | 0.012                           |
| 99112706          | olivine <sup>e</sup> | 76.09      | 41.12            | –                | 0.00                           | 0.00                           | 8.90               | –    | –    | 49.59 | 0.01  | –                 | –                | 99.62  | 0.907               |                  |                                 |
| RAYY              | opx                  | 20.64      | 57.10            | 0.01             | 1.64                           | 0.47                           | 5.70               | 0.12 | 0.08 | 35.25 | 0.64  | 0.01              | 0.00             | 101.04 | 0.917               |                  |                                 |
| 0425.42 / 2715.53 | cpx                  | 1.65       | 53.63            | 0.07             | 2.80                           | 1.13                           | 1.92               | 0.10 | 0.03 | 17.31 | 23.94 | 0.07              | 0.00             | 100.98 | 0.941               |                  |                                 |
|                   | spinel               | 0.74       | 0.01             | 0.07             | 23.45                          | 44.93                          | 19.35              | 0.25 | 0.08 | 12.53 | 0.00  | 0.00              | 0.00             | 100.67 | 0.575               | 0.562            | 0.017                           |
| 99112707          | olivine              | 71.49      | 41.51            | 0.00             | 0.00                           | 0.02                           | 8.68               | 0.09 | 0.35 | 50.85 | 0.01  | 0.00              | 0.00             | 101.52 | 0.913               |                  |                                 |
| RAYY              | opx                  | 25.24      | 56.45            | 0.04             | 2.57                           | 0.63                           | 5.55               | 0.10 | 0.07 | 33.80 | 1.01  | 0.01              | 0.00             | 100.23 | 0.916               |                  |                                 |
| 0425.00 / 2716.00 | cpx                  | 1.82       | 53.46            | 0.13             | 2.69                           | 0.83                           | 1.92               | 0.09 | 0.04 | 17.12 | 23.94 | 0.06              | 0.00             | 100.29 | 0.941               |                  |                                 |
|                   | spinel               | 0.73       | 0.15             | 0.16             | 32.05                          | 35.56                          | 16.69              | 0.20 | 0.13 | 14.86 | 0.01  | 0.02              | 0.00             | 99.84  | 0.650               | 0.427            | 0.014                           |

**Appendix 1. Continued**

| Reference No.     | Mineral              | Mode (wt%) | SiO <sub>2</sub> | TiO <sub>2</sub> | Al <sub>2</sub> O <sub>3</sub> | Cr <sub>2</sub> O <sub>3</sub> | FeO <sup>T b</sup> | MnO  | NiO  | MgO   | CaO   | Na <sub>2</sub> O | K <sub>2</sub> O | Total  | Mg# <sup>c, d</sup> | Cr# <sup>d</sup> | Fe <sup>3+</sup> # <sup>d</sup> |
|-------------------|----------------------|------------|------------------|------------------|--------------------------------|--------------------------------|--------------------|------|------|-------|-------|-------------------|------------------|--------|---------------------|------------------|---------------------------------|
| 99112708          | olivine <sup>c</sup> | 76.40      | 40.94            | –                | 0.00                           | 0.00                           | 9.15               | –    | –    | 49.03 | 0.01  | –                 | –                | 99.13  | 0.905               |                  |                                 |
| RAYY              | opx                  | 20.86      | 56.97            | 0.03             | 2.53                           | 0.74                           | 5.52               | 0.11 | 0.08 | 33.61 | 1.71  | 0.01              | 0.00             | 101.29 | 0.916               |                  |                                 |
| 0424.79 / 2716.84 | cpx                  | 1.48       | 54.14            | 0.06             | 2.17                           | 0.64                           | 1.96               | 0.05 | 0.04 | 18.00 | 24.02 | 0.01              | 0.00             | 101.09 | 0.943               |                  |                                 |
|                   | spinel               | 0.70       | 0.08             | 0.05             | 31.19                          | 37.21                          | 17.18              | 0.24 | 0.11 | 14.55 | 0.01  | 0.00              | 0.00             | 100.63 | 0.639               | 0.444            | 0.014                           |
| 99112709          | olivine              |            | 41.29            | 0.02             | 0.00                           | 0.00                           | 8.74               | 0.11 | 0.36 | 49.95 | 0.01  | 0.01              | 0.00             | 100.50 | 0.911               |                  |                                 |
| RAYY              | opx                  |            | 57.03            | 0.02             | 1.70                           | 0.45                           | 5.59               | 0.09 | 0.06 | 33.65 | 0.94  | 0.02              | 0.00             | 99.55  |                     |                  |                                 |
| 0424.42 / 2717.00 | cpx                  |            | 53.63            | 0.06             | 1.84                           | 0.79                           | 1.88               | 0.08 | 0.02 | 17.26 | 23.70 | 0.06              | 0.00             | 99.34  | 0.942               |                  |                                 |
|                   | spinel               |            | 0.10             | 0.07             | 23.99                          | 43.75                          | 18.49              | 0.30 | 0.07 | 12.44 | 0.00  | 0.01              | 0.00             | 99.22  | 0.575               | 0.550            | 0.013                           |
| 99112710          | olivine <sup>c</sup> | 74.66      | 41.30            | –                | 0.00                           | 0.00                           | 8.96               | –    | –    | 49.49 | 0.02  | –                 | –                | 99.77  | 0.908               |                  |                                 |
| RAYY              | opx                  | 22.14      | 57.66            | 0.02             | 1.22                           | 0.45                           | 5.51               | 0.14 | 0.10 | 34.39 | 1.13  | 0.01              | 0.00             | 100.64 | 0.917               |                  |                                 |
| 0424.11 / 2717.63 | cpx                  | 1.67       | 54.68            | 0.02             | 1.26                           | 0.65                           | 1.79               | 0.05 | 0.04 | 17.94 | 23.65 | 0.13              | 0.00             | 100.23 | 0.947               |                  |                                 |
|                   | spinel               | 0.76       | 0.15             | 0.07             | 18.85                          | 49.39                          | 20.17              | 0.28 | 0.06 | 11.09 | 0.01  | 0.01              | 0.00             | 100.09 | 0.524               | 0.637            | 0.013                           |
| 99112801          | olivine              |            | 41.57            | 0.00             | 0.00                           | 0.01                           | 8.57               | 0.12 | 0.39 | 50.65 | 0.02  | 0.00              | 0.00             | 101.34 | 0.913               |                  |                                 |
| RAYY              | opx                  |            | 58.20            | 0.03             | 1.27                           | 0.47                           | 5.62               | 0.08 | 0.06 | 34.90 | 0.75  | 0.00              | 0.00             | 101.40 | 0.917               |                  |                                 |
| 0425.74 / 2710.16 | cpx                  |            | 54.15            | 0.05             | 1.53                           | 0.76                           | 1.92               | 0.09 | 0.02 | 17.82 | 23.19 | 0.08              | 0.00             | 99.62  | 0.943               |                  |                                 |
|                   | spinel               |            | 0.13             | 0.12             | 18.06                          | 48.97                          | 21.13              | 0.25 | 0.06 | 11.19 | 0.01  | 0.00              | 0.00             | 99.93  | 0.530               | 0.645            | 0.021                           |
| 99112802          | olivine <sup>c</sup> | 77.30      | 41.34            | –                | 0.00                           | 0.00                           | 9.16               | –    | –    | 49.56 | 0.02  | –                 | –                | 100.08 | 0.906               |                  |                                 |
| RAYY              | opx                  | 19.64      | 58.44            | 0.01             | 0.70                           | 0.32                           | 5.56               | 0.14 | 0.07 | 35.06 | 0.74  | 0.01              | 0.00             | 101.04 | 0.918               |                  |                                 |
| 0424.89 / 2710.32 | cpx                  | 1.20       | 55.64            | 0.01             | 0.73                           | 0.43                           | 1.89               | 0.06 | 0.01 | 18.45 | 24.03 | 0.04              | 0.00             | 101.30 | 0.946               |                  |                                 |
|                   | spinel               | 0.63       | 0.10             | 0.08             | 11.69                          | 56.15                          | 21.95              | 0.34 | 0.03 | 9.70  | 0.00  | 0.01              | 0.00             | 100.04 | 0.478               | 0.763            | 0.019                           |
| 99112803          | olivine              | 72.08      | 41.09            | 0.00             | 0.00                           | 0.01                           | 8.55               | 0.11 | 0.37 | 49.85 | 0.02  | 0.00              | 0.00             | 99.99  | 0.912               |                  |                                 |
| RAYY              | opx                  | 22.56      | 56.42            | 0.03             | 2.80                           | 0.69                           | 5.55               | 0.12 | 0.07 | 33.61 | 0.69  | 0.01              | 0.00             | 100.00 | 0.915               |                  |                                 |
| 0424.26 / 2710.79 | cpx                  | 4.63       | 52.67            | 0.08             | 3.04                           | 0.92                           | 2.01               | 0.12 | 0.00 | 16.96 | 23.36 | 0.07              | 0.00             | 99.24  | 0.938               |                  |                                 |
|                   | spinel               | 0.75       | 0.08             | 0.05             | 33.61                          | 34.06                          | 15.96              | 0.19 | 0.10 | 15.27 | 0.01  | 0.02              | 0.00             | 99.35  | 0.666               | 0.405            | 0.013                           |
| 99112804          | olivine              | 69.21      | 41.85            | 0.01             | 0.00                           | 0.01                           | 8.57               | 0.07 | 0.40 | 50.94 | 0.02  | 0.00              | 0.00             | 101.87 | 0.914               |                  |                                 |
| RAYY              | opx                  | 26.52      | 58.20            | 0.02             | 1.01                           | 0.41                           | 5.73               | 0.09 | 0.06 | 34.77 | 0.71  | 0.01              | 0.00             | 101.02 | 0.915               |                  |                                 |
| 0424.05 / 2711.63 | cpx                  | 1.51       | 55.05            | 0.01             | 1.04                           | 0.59                           | 1.85               | 0.08 | 0.04 | 18.29 | 24.15 | 0.04              | 0.00             | 101.14 | 0.946               |                  |                                 |
|                   | spinel               | 0.94       | 0.25             | 0.08             | 15.08                          | 53.37                          | 20.83              | 0.30 | 0.03 | 10.44 | 0.01  | 0.03              | 0.00             | 100.42 | 0.500               | 0.704            | 0.014                           |
| 99112805          | olivine              | 68.14      | 41.22            | 0.00             | 0.00                           | 0.00                           | 9.15               | 0.09 | 0.36 | 50.56 | 0.02  | 0.00              | 0.00             | 101.42 | 0.908               |                  |                                 |
| RAYY              | opx                  | 24.39      | 56.85            | 0.04             | 2.66                           | 0.70                           | 5.77               | 0.11 | 0.08 | 33.68 | 1.03  | 0.01              | 0.00             | 100.92 | 0.912               |                  |                                 |
| 0423.42 / 2711.84 | cpx                  | 5.48       | 55.12            | 0.05             | 2.70                           | 0.79                           | 3.06               | 0.06 | 0.02 | 21.73 | 18.01 | 0.01              | 0.00             | 101.56 | 0.931               |                  |                                 |
|                   | spinel               | 0.69       | 0.05             | 0.06             | 32.46                          | 36.07                          | 17.35              | 0.22 | 0.11 | 14.58 | 0.00  | 0.00              | 0.00             | 100.90 | 0.635               | 0.427            | 0.013                           |
| 99112807          | olivine              |            | 41.28            | 0.02             | 0.00                           | 0.02                           | 8.62               | 0.14 | 0.37 | 50.93 | 0.05  | 0.00              | 0.00             | 101.43 | 0.913               |                  |                                 |
| RAYY              | opx                  |            | 57.53            | 0.01             | 0.60                           | 0.28                           | 5.77               | 0.17 | 0.08 | 35.76 | 0.56  | 0.01              | 0.00             | 100.79 | 0.917               |                  |                                 |
| 0422.21 / 2712.89 | cpx                  |            | –                | –                | –                              | –                              | –                  | –    | –    | –     | –     | –                 | –                | –      | –                   |                  |                                 |
|                   | spinel               |            | 0.07             | 0.11             | 11.18                          | 57.72                          | 22.70              | 0.33 | 0.05 | 9.30  | 0.03  | 0.00              | 0.00             | 101.49 | 0.456               | 0.776            | 0.018                           |

**Appendix 1. Continued**

| Reference No.     | Mineral              | Mode (wt%) | SiO <sub>2</sub> | TiO <sub>2</sub> | Al <sub>2</sub> O <sub>3</sub> | Cr <sub>2</sub> O <sub>3</sub> | FeO <sup>T b</sup> | MnO  | NiO  | MgO   | CaO   | Na <sub>2</sub> O | K <sub>2</sub> O | Total  | Mg# <sup>c, d</sup> | Cr# <sup>d</sup> | Fe <sup>3+</sup> # <sup>d</sup> |
|-------------------|----------------------|------------|------------------|------------------|--------------------------------|--------------------------------|--------------------|------|------|-------|-------|-------------------|------------------|--------|---------------------|------------------|---------------------------------|
| 99112808          | olivine              |            | 41.62            | 0.00             | 0.01                           | 0.01                           | 8.87               | 0.14 | 0.39 | 50.66 | 0.03  | 0.00              | 0.00             | 101.73 | 0.911               |                  |                                 |
| RAYY              | opx                  |            | 56.60            | 0.01             | 2.67                           | 0.67                           | 5.76               | 0.13 | 0.05 | 34.34 | 0.68  | 0.00              | 0.00             | 100.93 | 0.914               |                  |                                 |
| 0422.00 / 2713.74 | cpx                  |            | 53.74            | 0.07             | 1.94                           | 0.48                           | 1.79               | 0.07 | 0.05 | 17.77 | 24.74 | 0.03              | 0.00             | 100.67 | 0.947               |                  |                                 |
|                   | spinel               |            | 0.04             | 0.03             | 32.39                          | 35.86                          | 17.02              | 0.18 | 0.12 | 15.03 | 0.01  | 0.01              | 0.00             | 100.70 | 0.655               | 0.426            | 0.016                           |
| 99112809          | olivine <sup>e</sup> | 74.96      | 41.14            | –                | 0.00                           | 0.00                           | 8.75               | –    | –    | 49.85 | 0.03  | –                 | –                | 99.77  | 0.910               |                  |                                 |
| RAYY              | opx                  | 21.66      | 57.54            | 0.03             | 2.20                           | 0.57                           | 5.35               | 0.10 | 0.10 | 34.34 | 1.12  | 0.01              | 0.00             | 101.37 | 0.920               |                  |                                 |
| 0421.16 / 2714.00 | cpx                  | 2.15       | 54.16            | 0.06             | 2.51                           | 0.85                           | 2.04               | 0.09 | 0.07 | 17.56 | 24.04 | 0.05              | 0.00             | 101.43 | 0.939               |                  |                                 |
|                   | spinel               | 0.76       | 0.13             | 0.07             | 29.57                          | 38.97                          | 17.05              | 0.21 | 0.10 | 14.41 | 0.01  | 0.01              | 0.00             | 100.54 | 0.636               | 0.469            | 0.013                           |
| 99112810          | olivine <sup>e</sup> |            | 40.81            | –                | 0.00                           | 0.00                           | 9.29               | –    | –    | 49.07 | 0.03  | –                 | –                | 99.19  | 0.904               |                  |                                 |
| RAYY              | opx                  |            | 57.71            | 0.02             | 1.58                           | 0.51                           | 5.71               | 0.13 | 0.11 | 34.45 | 0.65  | 0.00              | 0.00             | 100.86 | 0.915               |                  |                                 |
| 0421.16 / 2714.84 | cpx                  |            | 54.75            | 0.05             | 1.58                           | 0.64                           | 2.00               | 0.10 | 0.04 | 17.99 | 24.04 | 0.01              | 0.00             | 101.18 | 0.941               |                  |                                 |
|                   | spinel               |            | 0.13             | 0.06             | 21.48                          | 46.01                          | 19.95              | 0.25 | 0.10 | 11.86 | 0.01  | 0.00              | 0.00             | 99.86  | 0.553               | 0.590            | 0.017                           |
| 99112811          | olivine              | 61.53      | 41.26            | 0.01             | 0.00                           | 0.00                           | 9.13               | 0.13 | 0.38 | 50.64 | 0.03  | 0.00              | 0.00             | 101.58 | 0.908               |                  |                                 |
| RAYY              | opx                  | 31.79      | 56.25            | 0.02             | 2.45                           | 0.58                           | 5.92               | 0.13 | 0.04 | 34.41 | 0.62  | 0.01              | 0.00             | 100.43 | 0.912               |                  |                                 |
| 0421.11 / 2715.47 | cpx                  | 4.90       | 52.98            | 0.08             | 2.72                           | 0.97                           | 2.28               | 0.08 | 0.03 | 18.64 | 22.46 | 0.04              | 0.00             | 100.28 | 0.936               |                  |                                 |
|                   | spinel               | 0.70       | 0.05             | 0.06             | 31.17                          | 37.46                          | 17.69              | 0.19 | 0.11 | 14.50 | 0.00  | 0.01              | 0.00             | 101.25 | 0.633               | 0.446            | 0.015                           |
| 99112812          | olivine <sup>e</sup> | 72.80      | 41.00            | –                | 0.00                           | 0.00                           | 9.12               | –    | –    | 49.36 | 0.04  | –                 | –                | 99.51  | 0.906               |                  |                                 |
| RAYY              | opx                  | 23.54      | 57.56            | 0.02             | 1.38                           | 0.51                           | 5.53               | 0.12 | 0.09 | 34.22 | 1.24  | 0.00              | 0.00             | 100.66 | 0.917               |                  |                                 |
| 0421.11 / 2716.05 | cpx                  | 2.31       | 54.05            | 0.03             | 1.42                           | 0.61                           | 1.98               | 0.07 | 0.04 | 17.94 | 23.66 | 0.05              | 0.01             | 99.86  | 0.942               |                  |                                 |
|                   | spinel               | 0.68       | 0.14             | 0.07             | 20.43                          | 47.12                          | 19.80              | 0.27 | 0.08 | 11.57 | 0.01  | 0.02              | 0.00             | 99.51  | 0.544               | 0.607            | 0.015                           |
| 99112813          | olivine              |            | 41.45            | 0.00             | 0.01                           | 0.01                           | 8.98               | 0.11 | 0.36 | 50.41 | 0.02  | 0.00              | 0.00             | 101.35 | 0.909               |                  |                                 |
| RAYY              | opx                  |            | 57.67            | 0.02             | 1.28                           | 0.40                           | 5.80               | 0.12 | 0.08 | 34.70 | 0.90  | 0.00              | 0.00             | 100.97 | 0.914               |                  |                                 |
| 0420.37 / 2714.21 | cpx                  |            | –                | –                | –                              | –                              | –                  | –    | –    | –     | –     | –                 | –                | –      | –                   |                  |                                 |
|                   | spinel               |            | 0.13             | 0.06             | 16.93                          | 50.70                          | 21.32              | 0.27 | 0.04 | 11.08 | 0.00  | 0.00              | 0.00             | 100.55 | 0.526               | 0.668            | 0.021                           |
| 99112901          | olivine <sup>e</sup> | 77.40      | 41.39            | –                | 0.00                           | 0.00                           | 8.60               | –    | –    | 50.08 | 0.02  | –                 | –                | 100.09 | 0.912               |                  |                                 |
| RAYY              | opx                  | 19.36      | 57.99            | 0.01             | 1.31                           | 0.45                           | 5.33               | 0.12 | 0.10 | 35.10 | 0.81  | 0.00              | 0.00             | 101.22 | 0.921               |                  |                                 |
| 0429.42 / 2714.05 | cpx                  | 1.55       | 54.66            | 0.04             | 1.39                           | 0.72                           | 1.98               | 0.08 | 0.04 | 18.22 | 23.51 | 0.19              | 0.00             | 100.82 | 0.943               |                  |                                 |
|                   | spinel               | 0.75       | 0.11             | 0.08             | 19.27                          | 49.33                          | 19.56              | 0.24 | 0.06 | 11.74 | 0.00  | 0.01              | 0.00             | 100.40 | 0.549               | 0.632            | 0.014                           |
| 99112905          | olivine              | 70.31      | 41.17            | 0.00             | 0.00                           | 0.02                           | 8.58               | 0.12 | 0.38 | 50.79 | 0.03  | 0.01              | 0.00             | 101.10 | 0.913               |                  |                                 |
| RAYY              | opx                  | 27.07      | 57.87            | 0.01             | 1.03                           | 0.40                           | 5.73               | 0.15 | 0.06 | 35.08 | 0.91  | 0.00              | 0.00             | 101.24 | 0.916               |                  |                                 |
| 0427.89 / 2715.05 | cpx                  | 0.57       | 53.60            | 0.02             | 0.84                           | 0.37                           | 1.92               | 0.08 | 0.05 | 18.33 | 24.50 | 0.08              | 0.00             | 99.78  | 0.945               |                  |                                 |
|                   | spinel               | 0.83       | 0.04             | 0.10             | 15.01                          | 52.90                          | 21.97              | 0.30 | 0.04 | 10.47 | 0.02  | 0.01              | 0.00             | 100.86 | 0.503               | 0.703            | 0.022                           |
| 99112906          | olivine <sup>e</sup> | 84.67      | 40.99            | –                | 0.00                           | 0.00                           | 9.05               | –    | –    | 49.19 | 0.02  | –                 | –                | 99.24  | 0.906               |                  |                                 |
| RAYY              | opx                  | 13.46      | 57.27            | 0.03             | 1.43                           | 0.50                           | 5.46               | 0.12 | 0.09 | 34.48 | 0.84  | 0.01              | 0.00             | 100.23 | 0.918               |                  |                                 |
| 0427.79 / 2715.68 | cpx                  | 1.41       | 54.28            | 0.04             | 1.60                           | 0.73                           | 1.83               | 0.05 | 0.05 | 17.64 | 24.15 | 0.15              | 0.00             | 100.53 | 0.945               |                  |                                 |
|                   | spinel               | 0.64       | 0.20             | 0.11             | 19.86                          | 47.72                          | 20.62              | 0.27 | 0.04 | 11.37 | 0.00  | 0.01              | 0.00             | 100.20 | 0.531               | 0.617            | 0.017                           |



**Appendix 1. Continued**

| Reference No.     | Mineral              | Mode (wt%) | SiO <sub>2</sub> | TiO <sub>2</sub> | Al <sub>2</sub> O <sub>3</sub> | Cr <sub>2</sub> O <sub>3</sub> | FeO <sup>T b</sup> | MnO  | NiO  | MgO   | CaO   | Na <sub>2</sub> O | K <sub>2</sub> O | Total  | Mg# <sup>c, d</sup> | Cr# <sup>d</sup> | Fe <sup>3+</sup> # <sup>d</sup> |
|-------------------|----------------------|------------|------------------|------------------|--------------------------------|--------------------------------|--------------------|------|------|-------|-------|-------------------|------------------|--------|---------------------|------------------|---------------------------------|
| 99112907          | olivine              |            | 41.13            | 0.04             | 0.00                           | 0.03                           | 8.54               | 0.11 | 0.41 | 50.77 | 0.02  | 0.01              | 0.00             | 101.04 | 0.914               |                  |                                 |
| RAYY              | opx                  |            | 56.79            | 0.04             | 1.98                           | 0.60                           | 5.85               | 0.09 | 0.04 | 34.98 | 0.58  | 0.02              | 0.00             | 100.97 | 0.914               |                  |                                 |
| 0427.32 / 2716.26 | cpx                  |            | 53.58            | 0.03             | 2.12                           | 0.85                           | 2.16               | 0.07 | 0.05 | 17.91 | 24.05 | 0.04              | 0.00             | 100.86 | 0.937               |                  |                                 |
|                   | spinel               |            | 0.13             | 0.08             | 23.70                          | 44.21                          | 19.78              | 0.29 | 0.10 | 12.92 | 0.01  | 0.02              | 0.00             | 101.24 | 0.587               | 0.556            | 0.021                           |
| 99112908          | olivine <sup>e</sup> | 73.35      | 41.12            | –                | 0.00                           | 0.00                           | 9.07               | –    | –    | 49.52 | 0.02  | –                 | –                | 99.73  | 0.907               |                  |                                 |
| RAYY              | opx                  | 21.12      | 56.62            | 0.02             | 2.80                           | 0.63                           | 5.67               | 0.12 | 0.09 | 34.46 | 0.82  | 0.00              | 0.00             | 101.25 | 0.916               |                  |                                 |
| 0427.21 / 2716.84 | cpx                  | 4.06       | 53.36            | 0.08             | 2.72                           | 0.80                           | 1.99               | 0.07 | 0.04 | 17.48 | 23.93 | 0.12              | 0.00             | 100.58 | 0.940               |                  |                                 |
|                   | spinel               | 0.87       | 0.09             | 0.07             | 35.30                          | 32.92                          | 15.67              | 0.21 | 0.17 | 15.59 | 0.00  | 0.00              | 0.00             | 100.03 | 0.672               | 0.385            | 0.012                           |
| 99112909          | olivine              |            | 41.14            | 0.00             | 0.00                           | 0.00                           | 8.85               | 0.10 | 0.37 | 50.93 | 0.00  | 0.00              | 0.00             | 101.40 | 0.911               |                  |                                 |
| RAYY              | opx                  |            | 56.99            | 0.03             | 2.25                           | 0.66                           | 5.68               | 0.14 | 0.09 | 34.60 | 0.79  | 0.01              | 0.00             | 101.25 | 0.916               |                  |                                 |
| 0426.95 / 2717.53 | cpx                  |            | 54.18            | 0.05             | 1.95                           | 0.70                           | 1.91               | 0.07 | 0.01 | 17.82 | 24.30 | 0.12              | 0.00             | 101.11 | 0.943               |                  |                                 |
|                   | spinel               |            | 0.08             | 0.05             | 27.60                          | 41.91                          | 17.45              | 0.26 | 0.09 | 14.00 | 0.00  | 0.00              | 0.00             | 101.44 | 0.621               | 0.505            | 0.013                           |
| 99112910          | olivine              | 79.78      | 41.08            | 0.03             | 0.00                           | 0.03                           | 8.52               | 0.12 | 0.36 | 51.03 | 0.02  | 0.00              | 0.00             | 101.19 | 0.914               |                  |                                 |
| RAYY              | opx                  | 17.83      | 57.53            | 0.05             | 1.80                           | 0.58                           | 5.47               | 0.08 | 0.05 | 34.72 | 1.16  | 0.00              | 0.00             | 101.43 | 0.919               |                  |                                 |
| 0426.63 / 2718.21 | cpx                  | 1.09       | 54.61            | 0.07             | 1.60                           | 0.66                           | 1.85               | 0.07 | 0.07 | 18.15 | 23.87 | 0.11              | 0.01             | 101.07 | 0.946               |                  |                                 |
|                   | spinel               | 0.79       | 0.10             | 0.12             | 23.27                          | 45.50                          | 19.12              | 0.27 | 0.10 | 12.68 | 0.00  | 0.02              | 0.00             | 101.18 | 0.577               | 0.567            | 0.015                           |
| 99112911          | olivine              |            | 41.99            | 0.00             | 0.00                           | 0.03                           | 8.41               | 0.12 | 0.39 | 50.97 | 0.01  | 0.01              | 0.00             | 101.93 | 0.915               |                  |                                 |
| RAYY              | opx                  |            | 56.85            | 0.03             | 2.51                           | 0.66                           | 5.72               | 0.12 | 0.08 | 34.42 | 0.63  | 0.00              | 0.00             | 101.02 | 0.915               |                  |                                 |
| 0426.16 / 2718.84 | cpx                  |            | 54.05            | 0.04             | 2.24                           | 0.68                           | 1.96               | 0.07 | 0.05 | 17.68 | 24.51 | 0.02              | 0.00             | 101.30 | 0.941               |                  |                                 |
|                   | spinel               |            | 0.06             | 0.05             | 31.56                          | 36.65                          | 17.36              | 0.18 | 0.12 | 14.83 | 0.01  | 0.01              | 0.00             | 100.84 | 0.647               | 0.438            | 0.017                           |
| 99112912          | olivine <sup>e</sup> | 71.07      | 41.31            | –                | 0.00                           | 0.00                           | 9.18               | –    | –    | 49.90 | 0.04  | –                 | –                | 100.42 | 0.906               |                  |                                 |
| RAYY              | opx                  | 22.51      | 56.95            | 0.01             | 2.28                           | 0.62                           | 5.65               | 0.13 | 0.09 | 34.31 | 0.71  | 0.00              | 0.00             | 100.76 | 0.915               |                  |                                 |
| 0426.00 / 2719.53 | cpx                  | 4.56       | 54.52            | 0.05             | 2.08                           | 0.71                           | 1.84               | 0.08 | 0.03 | 17.58 | 24.35 | 0.02              | 0.00             | 101.27 | 0.945               |                  |                                 |
|                   | spinel               | 0.69       | 0.15             | 0.05             | 28.55                          | 40.12                          | 17.41              | 0.23 | 0.12 | 14.01 | 0.01  | 0.00              | 0.00             | 100.66 | 0.622               | 0.485            | 0.013                           |
| 99112913          | olivine              |            | 41.53            | 0.01             | 0.00                           | 0.00                           | 8.85               | 0.08 | 0.35 | 50.71 | 0.02  | 0.00              | 0.00             | 101.54 | 0.911               |                  |                                 |
| RAYY              | opx                  |            | 57.64            | 0.03             | 2.19                           | 0.46                           | 5.79               | 0.10 | 0.06 | 34.46 | 0.71  | 0.01              | 0.00             | 101.45 | 0.914               |                  |                                 |
| 0427.63 / 2717.42 | cpx                  |            | 54.01            | 0.05             | 2.47                           | 0.77                           | 2.07               | 0.08 | 0.04 | 17.53 | 23.20 | 0.07              | 0.00             | 100.30 | 0.938               |                  |                                 |
|                   | spinel               |            | 0.04             | 0.07             | 31.15                          | 36.59                          | 17.36              | 0.21 | 0.05 | 14.12 | 0.00  | 0.01              | 0.00             | 99.60  | 0.625               | 0.441            | 0.013                           |
| 99112914          | olivine <sup>e</sup> | 77.61      | 41.05            | –                | 0.00                           | 0.00                           | 8.88               | –    | –    | 49.62 | 0.02  | –                 | –                | 99.57  | 0.909               |                  |                                 |
| RAYY              | opx                  | 18.46      | 56.65            | 0.02             | 1.89                           | 0.60                           | 5.59               | 0.13 | 0.07 | 34.86 | 0.62  | 0.00              | 0.00             | 100.43 | 0.917               |                  |                                 |
| 0428.00 / 2718.26 | cpx                  | 2.61       | 53.23            | 0.04             | 1.82                           | 0.67                           | 2.04               | 0.09 | 0.03 | 18.31 | 23.58 | 0.08              | 0.00             | 99.90  | 0.942               |                  |                                 |
|                   | spinel               | 0.72       | 0.19             | 0.04             | 26.64                          | 42.57                          | 17.93              | 0.23 | 0.09 | 13.63 | 0.00  | 0.01              | 0.00             | 101.34 | 0.607               | 0.517            | 0.012                           |
| 99112915          | olivine              | 70.40      | 41.17            | 0.01             | 0.00                           | 0.00                           | 8.57               | 0.14 | 0.39 | 50.73 | 0.01  | 0.01              | 0.00             | 101.05 | 0.913               |                  |                                 |
| RAYY              | opx                  | 25.16      | 56.90            | 0.01             | 1.56                           | 0.56                           | 5.66               | 0.13 | 0.10 | 34.63 | 0.68  | 0.01              | 0.00             | 100.23 | 0.916               |                  |                                 |
| 0428.00 / 2718.68 | cpx                  | 2.28       | 53.53            | 0.02             | 1.66                           | 0.78                           | 1.93               | 0.08 | 0.06 | 17.71 | 24.21 | 0.09              | 0.00             | 100.06 | 0.942               |                  |                                 |
|                   | spinel               | 0.89       | 0.02             | 0.05             | 20.70                          | 47.26                          | 19.56              | 0.26 | 0.05 | 12.02 | 0.01  | 0.01              | 0.00             | 99.95  | 0.563               | 0.605            | 0.018                           |

**Appendix 1. Continued**

| Reference No.     | Mineral              | Mode (wt%) | SiO <sub>2</sub> | TiO <sub>2</sub> | Al <sub>2</sub> O <sub>3</sub> | Cr <sub>2</sub> O <sub>3</sub> | FeO <sup>T b</sup> | MnO  | NiO  | MgO   | CaO   | Na <sub>2</sub> O | K <sub>2</sub> O | Total  | Mg# <sup>c, d</sup> | Cr# <sup>d</sup> | Fe <sup>3+</sup> # <sup>d</sup> |
|-------------------|----------------------|------------|------------------|------------------|--------------------------------|--------------------------------|--------------------|------|------|-------|-------|-------------------|------------------|--------|---------------------|------------------|---------------------------------|
| 99120101          | olivine              | 61.18      | 41.89            | 0.01             | 0.00                           | 0.02                           | 8.88               | 0.13 | 0.38 | 50.71 | 0.02  | 0.00              | 0.00             | 102.05 | 0.911               |                  |                                 |
| RAYY              | opx                  | 29.92      | 57.41            | 0.03             | 2.32                           | 0.57                           | 5.77               | 0.10 | 0.07 | 33.97 | 1.06  | 0.00              | 0.00             | 101.30 | 0.913               |                  |                                 |
| 0428.42 / 2711.42 | cpx                  | 5.70       | 54.06            | 0.06             | 2.72                           | 1.00                           | 2.01               | 0.09 | 0.02 | 17.12 | 24.08 | 0.07              | 0.00             | 101.23 | 0.938               |                  |                                 |
|                   | spinel               | 1.03       | 0.01             | 0.06             | 30.58                          | 37.83                          | 17.03              | 0.23 | 0.14 | 14.33 | 0.02  | 0.00              | 0.00             | 100.23 | 0.635               | 0.453            | 0.013                           |
| 99120102          | olivine <sup>e</sup> |            | 41.17            | –                | 0.00                           | 0.00                           | 8.86               | –    | –    | 49.75 | 0.02  | –                 | –                | 99.80  | 0.909               |                  |                                 |
| RAYY              | opx                  |            | 56.49            | 0.11             | 2.51                           | 0.70                           | 5.53               | 0.11 | 0.10 | 33.71 | 1.36  | 0.03              | 0.00             | 100.64 | 0.916               |                  |                                 |
| 0428.42 / 2711.42 | cpx                  |            | 53.77            | 0.21             | 3.20                           | 1.24                           | 2.02               | 0.09 | 0.06 | 17.32 | 22.63 | 0.49              | 0.00             | 101.04 | 0.938               |                  |                                 |
|                   | spinel               |            | 0.10             | 0.31             | 30.11                          | 38.94                          | 16.47              | 0.21 | 0.10 | 14.82 | 0.02  | 0.01              | 0.00             | 101.08 | 0.645               | 0.465            | 0.011                           |
| 99120110          | olivine <sup>e</sup> | 65.70      | 41.36            | –                | 0.00                           | 0.00                           | 9.27               | –    | –    | 49.70 | 0.03  | –                 | –                | 100.36 | 0.904               |                  |                                 |
| RAYY              | opx                  | 30.32      | 56.13            | 0.01             | 2.87                           | 0.72                           | 5.49               | 0.12 | 0.12 | 33.52 | 2.46  | 0.01              | 0.00             | 101.44 | 0.916               |                  |                                 |
| 0426.95 / 2707.89 | cpx                  | 2.45       | 53.40            | 0.05             | 2.89                           | 0.98                           | 2.02               | 0.08 | 0.02 | 18.13 | 23.60 | 0.04              | 0.01             | 101.21 | 0.941               |                  |                                 |
|                   | spinel               | 0.47       | 0.05             | 0.04             | 36.18                          | 31.29                          | 17.78              | 0.22 | 0.14 | 15.03 | 0.01  | 0.02              | 0.00             | 100.75 | 0.646               | 0.367            | 0.017                           |
| 99120111          | olivine <sup>e</sup> |            | 41.36            | –                | 0.00                           | 0.00                           | 8.40               | –    | –    | 49.96 | 0.04  | –                 | –                | 99.75  | 0.915               |                  |                                 |
| RAYY              | opx                  |            | 57.37            | 0.01             | 2.46                           | 0.70                           | 5.10               | 0.13 | 0.08 | 34.32 | 0.68  | 0.01              | 0.00             | 100.88 | 0.923               |                  |                                 |
| 0426.79 / 2708.11 | cpx                  |            | 54.34            | 0.04             | 2.37                           | 0.80                           | 1.87               | 0.08 | 0.06 | 17.68 | 23.58 | 0.20              | 0.00             | 101.01 | 0.944               |                  |                                 |
|                   | spinel               |            | –                | –                | –                              | –                              | –                  | –    | –    | –     | –     | –                 | –                | –      | –                   |                  |                                 |
| 99120201          | olivine              |            | 41.18            | 0.01             | 0.00                           | 0.03                           | 8.66               | 0.12 | 0.36 | 49.55 | 0.01  | 0.00              | 0.00             | 99.93  | 0.911               |                  |                                 |
| Wadi Shuwayhah    | opx                  |            | 57.76            | 0.03             | 2.00                           | 0.65                           | 5.56               | 0.09 | 0.10 | 33.88 | 1.18  | 0.01              | 0.00             | 101.25 | 0.916               |                  |                                 |
| 0423.53 / 2706.68 | cpx                  |            | 54.35            | 0.01             | 2.22                           | 0.88                           | 1.88               | 0.06 | 0.06 | 17.64 | 24.20 | 0.06              | 0.00             | 101.37 | 0.944               |                  |                                 |
|                   | spinel               |            | 0.03             | 0.07             | 25.13                          | 43.29                          | 17.53              | 0.25 | 0.07 | 13.33 | 0.01  | 0.01              | 0.00             | 99.72  | 0.608               | 0.536            | 0.013                           |
| 99120202          | olivine <sup>e</sup> |            | 41.19            | –                | 0.00                           | 0.00                           | 9.18               | –    | –    | 49.46 | 0.02  | –                 | –                | 99.85  | 0.906               |                  |                                 |
| Wadi Shuwayhah    | opx                  |            | 57.93            | 0.01             | 1.98                           | 0.72                           | 5.49               | 0.12 | 0.10 | 34.33 | 0.94  | 0.00              | 0.00             | 101.62 | 0.918               |                  |                                 |
| 0423.53 / 2706.68 | cpx                  |            | 54.39            | 0.01             | 2.02                           | 0.96                           | 1.77               | 0.06 | 0.07 | 17.45 | 23.58 | 0.03              | 0.01             | 100.35 | 0.946               |                  |                                 |
|                   | spinel               |            | 0.12             | 0.05             | 23.24                          | 46.58                          | 17.84              | 0.27 | 0.07 | 12.84 | 0.01  | 0.02              | 0.00             | 101.04 | 0.585               | 0.574            | 0.009                           |
| 99120204          | olivine <sup>e</sup> | 74.49      | 41.27            | –                | 0.00                           | 0.00                           | 9.16               | –    | –    | 49.67 | 0.01  | –                 | –                | 100.11 | 0.906               |                  |                                 |
| Wadi Shuwayhah    | opx                  | 21.86      | 57.32            | 0.02             | 2.04                           | 0.67                           | 5.63               | 0.11 | 0.09 | 34.46 | 0.99  | 0.00              | 0.00             | 101.33 | 0.916               |                  |                                 |
| 0423.58 / 2706.95 | cpx                  | 2.10       | 53.88            | 0.03             | 2.49                           | 1.04                           | 1.95               | 0.07 | 0.05 | 17.29 | 24.37 | 0.06              | 0.00             | 101.22 | 0.941               |                  |                                 |
|                   | spinel               | 0.48       | 0.07             | 0.02             | 26.11                          | 43.72                          | 16.98              | 0.21 | 0.09 | 13.65 | 0.01  | 0.01              | 0.00             | 100.87 | 0.613               | 0.529            | 0.009                           |
| 99120206          | olivine <sup>e</sup> |            | 41.64            | –                | 0.00                           | 0.00                           | 9.32               | –    | –    | 48.98 | 0.01  | –                 | –                | 99.94  | 0.904               |                  |                                 |
| Wadi Shuwayhah    | opx                  |            | 56.43            | 0.01             | 2.31                           | 0.63                           | 5.73               | 0.10 | 0.07 | 33.11 | 1.23  | 0.01              | 0.00             | 99.62  | 0.912               |                  |                                 |
| 0422.47 / 2707.11 | cpx                  |            | 53.16            | 0.03             | 2.37                           | 0.79                           | 2.08               | 0.08 | 0.04 | 17.10 | 23.48 | 0.01              | 0.00             | 99.15  | 0.936               |                  |                                 |
|                   | spinel               |            | 0.19             | 0.05             | 26.33                          | 41.70                          | 17.50              | 0.18 | 0.15 | 13.61 | 0.04  | 0.01              | 0.00             | 99.75  | 0.615               | 0.515            | 0.013                           |
| 99120207          | olivine <sup>e</sup> | 68.58      | 41.44            | –                | 0.00                           | 0.00                           | 8.96               | –    | –    | 49.93 | 0.02  | –                 | –                | 100.35 | 0.907               |                  |                                 |
| Wadi Shuwayhah    | opx                  | 29.02      | 57.83            | 0.01             | 1.33                           | 0.59                           | 5.54               | 0.12 | 0.07 | 34.92 | 1.32  | 0.01              | 0.00             | 101.73 | 0.918               |                  |                                 |
| 0422.79 / 2707.79 | cpx                  | 0.82       | 54.47            | 0.01             | 1.49                           | 0.82                           | 2.25               | 0.05 | 0.06 | 18.98 | 22.92 | 0.06              | 0.00             | 101.11 | 0.938               |                  |                                 |
|                   | spinel               | 0.56       | 0.04             | 0.07             | 17.84                          | 51.22                          | 19.53              | 0.29 | 0.04 | 11.58 | 0.00  | 0.02              | 0.00             | 100.64 | 0.547               | 0.658            | 0.015                           |

**Appendix 1. Continued**

| Reference No.     | Locality       | Mineral                     | Mode (wt%) | SiO <sub>2</sub> | TiO <sub>2</sub> | Al <sub>2</sub> O <sub>3</sub> | Cr <sub>2</sub> O <sub>3</sub> | FeO <sup>T b</sup> | MnO  | NiO  | MgO   | CaO   | Na <sub>2</sub> O | K <sub>2</sub> O | Total  | Mg# <sup>c, d</sup> | Cr# <sup>d</sup> | Fe <sup>3+</sup> # <sup>d</sup> |  |
|-------------------|----------------|-----------------------------|------------|------------------|------------------|--------------------------------|--------------------------------|--------------------|------|------|-------|-------|-------------------|------------------|--------|---------------------|------------------|---------------------------------|--|
|                   |                | UTM coordinate <sup>a</sup> |            |                  |                  |                                |                                |                    |      |      |       |       |                   |                  |        |                     |                  |                                 |  |
| 99120208          | Wadi Shuwayhah | olivine                     |            | 41.51            | 0.01             | 0.01                           | 0.02                           | 9.01               | 0.10 | 0.40 | 50.23 | 0.01  | 0.01              | 0.00             | 101.30 | 0.909               |                  |                                 |  |
| 0422.32 / 2708.58 |                | opx                         |            | 56.68            | 0.02             | 1.84                           | 0.56                           | 5.81               | 0.15 | 0.07 | 33.76 | 1.29  | 0.01              | 0.00             | 100.18 | 0.912               |                  |                                 |  |
|                   |                | cpx                         |            | —                | —                | —                              | —                              | —                  | —    | —    | —     | —     | —                 | —                | —      |                     |                  |                                 |  |
|                   |                | spinel                      |            | 0.04             | 0.02             | 24.86                          | 43.77                          | 17.96              | 0.22 | 0.08 | 13.22 | 0.01  | 0.02              | 0.00             | 100.21 | 0.602               | 0.542            | 0.014                           |  |
| 99120210          | Wadi Shuwayhah | olivine <sup>e</sup>        | 74.17      | 41.25            | —                | 0.00                           | 0.00                           | 8.91               | —    | —    | 49.64 | 0.02  | —                 | —                | 99.80  | 0.909               |                  |                                 |  |
| 0421.26 / 2709.26 |                | opx                         | 23.05      | 57.81            | 0.03             | 1.90                           | 0.59                           | 5.51               | 0.11 | 0.08 | 34.33 | 1.22  | 0.01              | 0.00             | 101.59 | 0.917               |                  |                                 |  |
|                   |                | cpx                         | 1.81       | 53.99            | 0.05             | 2.26                           | 1.11                           | 1.84               | 0.05 | 0.03 | 17.49 | 24.02 | 0.10              | 0.00             | 100.89 | 0.944               |                  |                                 |  |
|                   |                | spinel                      | 0.63       | 0.07             | 0.05             | 25.24                          | 43.70                          | 17.33              | 0.24 | 0.08 | 13.63 | 0.01  | 0.01              | 0.00             | 100.35 | 0.617               | 0.537            | 0.013                           |  |
| 99120211          | Wadi Shuwayhah | olivine                     |            | 41.93            | 0.01             | 0.00                           | 0.01                           | 8.50               | 0.12 | 0.34 | 51.12 | 0.01  | 0.01              | 0.00             | 102.05 | 0.915               |                  |                                 |  |
| 0420.79 / 2709.89 |                | opx                         |            | 57.32            | 0.04             | 2.03                           | 0.60                           | 5.58               | 0.14 | 0.08 | 34.23 | 1.29  | 0.00              | 0.00             | 101.32 | 0.916               |                  |                                 |  |
|                   |                | cpx                         |            | 54.23            | 0.05             | 2.22                           | 1.01                           | 2.01               | 0.06 | 0.07 | 17.75 | 23.29 | 0.11              | 0.00             | 100.81 | 0.941               |                  |                                 |  |
|                   |                | spinel                      |            | 0.05             | 0.11             | 25.34                          | 42.96                          | 17.75              | 0.23 | 0.12 | 13.60 | 0.01  | 0.01              | 0.00             | 100.18 | 0.616               | 0.532            | 0.015                           |  |
| 99120212          | Wadi Shuwayhah | olivine <sup>e</sup>        | 69.82      | 41.21            | —                | 0.00                           | 0.00                           | 9.03               | —    | —    | 49.75 | 0.27  | —                 | —                | 100.26 | 0.908               |                  |                                 |  |
| 0420.47 / 2710.47 |                | opx                         | 27.61      | 58.21            | 0.02             | 1.36                           | 0.51                           | 5.65               | 0.13 | 0.07 | 34.88 | 0.68  | 0.00              | 0.00             | 101.51 | 0.917               |                  |                                 |  |
|                   |                | cpx                         | 1.22       | 55.33            | 0.03             | 1.54                           | 0.77                           | 1.75               | 0.05 | 0.06 | 18.01 | 23.79 | 0.15              | 0.00             | 101.49 | 0.948               |                  |                                 |  |
|                   |                | spinel                      | 0.69       | 0.07             | 0.06             | 19.43                          | 49.68                          | 18.66              | 0.28 | 0.05 | 12.25 | 0.01  | 0.01              | 0.00             | 100.50 | 0.572               | 0.632            | 0.014                           |  |
| 99120213          | Wadi Shuwayhah | olivine                     | 64.87      | 41.34            | 0.01             | 0.01                           | 0.01                           | 8.75               | 0.11 | 0.37 | 50.34 | 0.03  | 0.00              | 0.00             | 100.96 | 0.911               |                  |                                 |  |
| 0420.26 / 2711.37 |                | opx                         | 30.31      | 57.33            | 0.02             | 1.55                           | 0.50                           | 5.66               | 0.12 | 0.10 | 34.33 | 1.04  | 0.00              | 0.00             | 100.66 | 0.915               |                  |                                 |  |
|                   |                | cpx                         | 3.00       | 54.13            | 0.02             | 1.70                           | 0.71                           | 2.10               | 0.07 | 0.05 | 17.80 | 23.19 | 0.01              | 0.00             | 99.79  | 0.938               |                  |                                 |  |
|                   |                | spinel                      | 0.92       | 0.09             | 0.05             | 20.84                          | 46.53                          | 20.55              | 0.28 | 0.06 | 11.69 | 0.00  | 0.01              | 0.00             | 100.09 | 0.547               | 0.600            | 0.020                           |  |
| 99120216          | Wadi Shuwayhah | olivine                     | 68.94      | 40.72            | 0.00             | 0.00                           | 0.01                           | 8.29               | 0.08 | 0.37 | 49.82 | 0.01  | 0.00              | 0.00             | 99.32  | 0.915               |                  |                                 |  |
| 0421.58 / 2710.16 |                | opx                         | 28.49      | 56.76            | 0.02             | 2.60                           | 0.82                           | 5.23               | 0.10 | 0.10 | 33.67 | 1.59  | 0.01              | 0.00             | 100.88 | 0.920               |                  |                                 |  |
|                   |                | cpx                         | 1.88       | 54.11            | 0.03             | 2.87                           | 0.94                           | 1.77               | 0.07 | 0.02 | 17.20 | 24.51 | 0.03              | 0.00             | 101.56 | 0.945               |                  |                                 |  |
|                   |                | spinel                      | 0.48       | 0.04             | 0.02             | 30.67                          | 38.03                          | 16.49              | 0.23 | 0.12 | 14.65 | 0.00  | 0.00              | 0.00             | 100.24 | 0.647               | 0.454            | 0.013                           |  |
| 99120217          | Wadi Shuwayhah | olivine                     |            | 42.13            | 0.02             | 0.00                           | 0.00                           | 8.68               | 0.12 | 0.38 | 50.97 | 0.03  | 0.00              | 0.00             | 102.31 | 0.913               |                  |                                 |  |
| 0422.00 / 2710.89 |                | opx                         |            | 57.25            | 0.01             | 1.48                           | 0.46                           | 5.74               | 0.13 | 0.04 | 34.98 | 0.64  | 0.00              | 0.00             | 100.74 | 0.916               |                  |                                 |  |
|                   |                | cpx                         |            | 54.44            | 0.05             | 1.35                           | 0.59                           | 1.90               | 0.07 | 0.03 | 18.32 | 24.15 | 0.07              | 0.01             | 100.98 | 0.945               |                  |                                 |  |
|                   |                | spinel                      |            | 0.08             | 0.09             | 20.75                          | 48.32                          | 18.89              | 0.25 | 0.04 | 12.38 | 0.00  | 0.01              | 0.00             | 100.82 | 0.572               | 0.610            | 0.014                           |  |
| 99120302          | Wadi Shuwayhah | olivine <sup>e</sup>        |            | 40.99            | —                | 0.00                           | 0.00                           | 9.13               | —    | —    | 49.21 | 0.01  | —                 | —                | 99.34  | 0.906               |                  |                                 |  |
| 0423.68 / 2707.47 |                | opx                         |            | 57.30            | 0.03             | 2.66                           | 0.63                           | 5.78               | 0.13 | 0.07 | 34.15 | 0.73  | 0.01              | 0.00             | 101.49 | 0.913               |                  |                                 |  |
|                   |                | cpx                         |            | 53.55            | 0.05             | 3.13                           | 1.12                           | 1.92               | 0.04 | 0.05 | 17.02 | 24.15 | 0.02              | 0.00             | 101.06 | 0.940               |                  |                                 |  |
|                   |                | spinel                      |            | 0.11             | 0.05             | 33.11                          | 36.07                          | 15.45              | 0.18 | 0.13 | 15.14 | 0.00  | 0.00              | 0.00             | 100.24 | 0.658               | 0.422            | 0.008                           |  |
| 99120303          | Wadi Shuwayhah | olivine                     |            | 41.20            | 0.01             | 0.00                           | 0.01                           | 8.13               | 0.12 | 0.42 | 50.83 | 0.03  | 0.01              | 0.00             | 100.75 | 0.918               |                  |                                 |  |
| 0423.58 / 2707.95 |                | opx                         |            | 56.54            | 0.02             | 2.60                           | 0.66                           | 5.35               | 0.08 | 0.08 | 34.29 | 1.03  | 0.02              | 0.00             | 100.67 | 0.920               |                  |                                 |  |
|                   |                | cpx                         |            | —                | —                | —                              | —                              | —                  | —    | —    | —     | —     | —                 | —                | —      |                     |                  |                                 |  |
|                   |                | spinel                      |            | 0.02             | 0.01             | 33.14                          | 36.61                          | 13.95              | 0.18 | 0.10 | 16.03 | 0.02  | 0.01              | 0.00             | 100.08 | 0.696               | 0.426            | 0.008                           |  |

**Appendix 1. Continued**

| Reference No.               | Mineral              | Mode (wt%) | SiO <sub>2</sub> | TiO <sub>2</sub> | Al <sub>2</sub> O <sub>3</sub> | Cr <sub>2</sub> O <sub>3</sub> | FeO <sup>T b</sup> | MnO  | NiO  | MgO   | CaO   | Na <sub>2</sub> O | K <sub>2</sub> O | Total  | Mg# <sup>c, d</sup> | Cr# <sup>d</sup> | Fe <sup>3+</sup> # <sup>d</sup> |
|-----------------------------|----------------------|------------|------------------|------------------|--------------------------------|--------------------------------|--------------------|------|------|-------|-------|-------------------|------------------|--------|---------------------|------------------|---------------------------------|
| UTM coordinate <sup>a</sup> |                      |            |                  |                  |                                |                                |                    |      |      |       |       |                   |                  |        |                     |                  |                                 |
| 99120304                    | olivine              |            | 41.85            | 0.01             | 0.00                           | 0.01                           | 9.19               | 0.11 | 0.40 | 50.86 | 0.02  | 0.02              | 0.00             | 102.46 | 0.908               |                  |                                 |
| Wadi Shuwayhah              | opx                  |            | –                | –                | –                              | –                              | –                  | –    | –    | –     | –     | –                 | –                | –      |                     |                  |                                 |
| 0423.53 / 2708.37           | cpx                  |            | 51.84            | 0.06             | 2.02                           | 0.93                           | 2.80               | 0.08 | 0.06 | 19.07 | 22.15 | 0.07              | 0.00             | 99.07  | 0.924               |                  |                                 |
|                             | spinel               |            | 0.01             | 0.08             | 21.75                          | 47.27                          | 19.33              | 0.25 | 0.08 | 12.45 | 0.02  | 0.01              | 0.00             | 101.24 | 0.573               | 0.593            | 0.016                           |
| 99120305                    | olivine <sup>e</sup> | 69.90      | 41.38            | –                | 0.00                           | 0.00                           | 9.06               | –    | –    | 49.79 | 0.02  | –                 | –                | 100.25 | 0.907               |                  |                                 |
| Wadi Shuwayhah              | opx                  | 24.69      | 57.08            | 0.02             | 2.86                           | 0.79                           | 5.66               | 0.13 | 0.11 | 34.21 | 0.74  | 0.01              | 0.00             | 101.60 | 0.915               |                  |                                 |
| 0423.16 / 2708.58           | cpx                  | 4.11       | 53.96            | 0.08             | 2.53                           | 0.76                           | 2.06               | 0.05 | 0.02 | 17.78 | 23.92 | 0.03              | 0.00             | 101.20 | 0.939               |                  |                                 |
|                             | spinel               | 0.55       | 0.13             | 0.07             | 34.37                          | 34.57                          | 15.56              | 0.19 | 0.14 | 15.58 | 0.00  | 0.01              | 0.00             | 100.63 | 0.669               | 0.403            | 0.010                           |
| 99120306                    | olivine              |            | 41.50            | 0.01             | 0.01                           | 0.02                           | 8.67               | 0.09 | 0.38 | 50.55 | 0.01  | 0.00              | 0.00             | 101.23 | 0.912               |                  |                                 |
| Wadi Shuwayhah              | opx                  |            | 57.66            | 0.01             | 1.12                           | 0.41                           | 5.60               | 0.13 | 0.09 | 34.62 | 0.91  | 0.01              | 0.00             | 100.56 | 0.917               |                  |                                 |
| 0423.11 / 2709.37           | cpx                  |            | –                | –                | –                              | –                              | –                  | –    | –    | –     | –     | –                 | –                | –      |                     |                  |                                 |
|                             | spinel               |            | 0.02             | 0.07             | 17.37                          | 51.05                          | 19.73              | 0.28 | 0.05 | 11.09 | 0.01  | 0.00              | 0.00             | 99.67  | 0.531               | 0.664            | 0.014                           |
| 99120307                    | olivine <sup>e</sup> | 70.42      | 41.39            | –                | 0.00                           | 0.00                           | 8.75               | –    | –    | 49.87 | 0.04  | –                 | –                | 100.05 | 0.910               |                  |                                 |
| Wadi Shuwayhah              | opx                  | 25.34      | 57.98            | 0.01             | 1.67                           | 0.56                           | 5.48               | 0.12 | 0.09 | 34.28 | 1.30  | 0.01              | 0.00             | 101.52 | 0.918               |                  |                                 |
| 0422.95 / 2710.05           | cpx                  | 2.51       | 54.38            | 0.03             | 1.96                           | 0.95                           | 1.89               | 0.08 | 0.05 | 17.59 | 24.59 | 0.03              | 0.00             | 101.55 | 0.943               |                  |                                 |
|                             | spinel               | 0.65       | 0.16             | 0.06             | 22.56                          | 46.30                          | 18.57              | 0.26 | 0.08 | 12.47 | 0.01  | 0.00              | 0.00             | 100.48 | 0.573               | 0.579            | 0.012                           |
| 99120308                    | olivine              |            | 41.58            | 0.01             | 0.00                           | 0.01                           | 8.61               | 0.10 | 0.40 | 50.94 | 0.01  | 0.00              | 0.00             | 101.67 | 0.913               |                  |                                 |
| Wadi Shuwayhah              | opx                  |            | 56.94            | 0.04             | 2.85                           | 0.58                           | 5.77               | 0.10 | 0.09 | 34.52 | 0.51  | 0.00              | 0.00             | 101.40 | 0.914               |                  |                                 |
| 0422.89 / 2710.68           | cpx                  |            | 53.96            | 0.11             | 2.91                           | 0.79                           | 2.00               | 0.06 | 0.06 | 17.46 | 23.30 | 0.06              | 0.00             | 100.69 | 0.940               |                  |                                 |
|                             | spinel               |            | 0.04             | 0.07             | 39.03                          | 28.93                          | 15.23              | 0.19 | 0.17 | 16.33 | 0.00  | 0.02              | 0.00             | 100.01 | 0.692               | 0.332            | 0.012                           |
| 99120310                    | olivine <sup>e</sup> |            | 41.32            | –                | 0.00                           | 0.00                           | 8.92               | –    | –    | 49.98 | 0.03  | –                 | –                | 100.25 | 0.908               |                  |                                 |
| Wadi Shuwayhah              | opx                  |            | 56.15            | 0.02             | 1.58                           | 0.51                           | 5.63               | 0.09 | 0.06 | 34.43 | 1.66  | 0.02              | 0.00             | 100.15 | 0.916               |                  |                                 |
| 0424.63 / 2708.00           | cpx                  |            | –                | –                | –                              | –                              | –                  | –    | –    | –     | –     | –                 | –                | –      |                     |                  |                                 |
|                             | spinel               |            | 0.06             | 0.04             | 20.57                          | 48.46                          | 18.85              | 0.26 | 0.02 | 12.53 | 0.02  | 0.08              | 0.00             | 100.88 | 0.580               | 0.612            | 0.016                           |
| 99120311                    | olivine <sup>e</sup> |            | 40.98            | –                | 0.00                           | 0.00                           | 8.78               | –    | –    | 49.90 | 0.03  | –                 | –                | 99.68  | 0.910               |                  |                                 |
| Wadi Shuwayhah              | opx                  |            | 57.83            | 0.02             | 1.97                           | 0.61                           | 5.37               | 0.13 | 0.11 | 34.34 | 1.41  | 0.00              | 0.00             | 101.78 | 0.919               |                  |                                 |
| 0424.37 / 2708.58           | cpx                  |            | 55.51            | 0.04             | 2.04                           | 0.51                           | 2.55               | 0.07 | 0.09 | 21.71 | 18.36 | 0.06              | 0.01             | 101.04 | 0.941               |                  |                                 |
|                             | spinel               |            | –                | –                | –                              | –                              | –                  | –    | –    | –     | –     | –                 | –                | –      |                     |                  |                                 |
| 99120313                    | olivine              |            | 41.98            | 0.01             | 0.00                           | 0.01                           | 8.79               | 0.10 | 0.40 | 51.31 | 0.01  | 0.01              | 0.00             | 102.61 | 0.912               |                  |                                 |
| Wadi Shuwayhah              | opx                  |            | 57.61            | 0.01             | 1.62                           | 0.58                           | 5.50               | 0.11 | 0.07 | 34.48 | 1.35  | 0.01              | 0.00             | 101.34 | 0.918               |                  |                                 |
| 0424.42 / 2708.95           | cpx                  |            | 54.55            | 0.01             | 1.81                           | 0.73                           | 2.10               | 0.07 | 0.07 | 18.85 | 22.19 | 0.00              | 0.00             | 100.39 | 0.941               |                  |                                 |
|                             | spinel               |            | 0.02             | 0.09             | 19.58                          | 48.75                          | 19.44              | 0.25 | 0.06 | 12.24 | 0.01  | 0.01              | 0.00             | 100.44 | 0.572               | 0.626            | 0.019                           |
| 99120504                    | olivine <sup>e</sup> |            | 41.45            | –                | 0.00                           | 0.00                           | 9.23               | –    | –    | 49.35 | 0.04  | –                 | –                | 100.07 | 0.905               |                  |                                 |
| Wadi Shuwayhah              | opx                  |            | 56.75            | 0.01             | 3.15                           | 0.88                           | 5.72               | 0.12 | 0.09 | 33.46 | 1.26  | 0.01              | 0.00             | 101.46 | 0.913               |                  |                                 |
| 0422.74 / 2705.21           | cpx                  |            | 54.21            | 0.05             | 3.14                           | 1.06                           | 2.17               | 0.07 | 0.02 | 18.85 | 21.44 | 0.05              | 0.00             | 101.05 | 0.940               |                  |                                 |
|                             | spinel               |            | 0.14             | 0.04             | 34.49                          | 34.37                          | 15.68              | 0.21 | 0.14 | 15.53 | 0.02  | 0.00              | 0.00             | 100.63 | 0.668               | 0.401            | 0.011                           |

**Appendix 1. Continued**

| Reference No. | Locality                    | Mineral              | Mode (wt%) | SiO <sub>2</sub> | TiO <sub>2</sub> | Al <sub>2</sub> O <sub>3</sub> | Cr <sub>2</sub> O <sub>3</sub> | FeO <sup>T b</sup> | MnO  | NiO  | MgO   | CaO   | Na <sub>2</sub> O | K <sub>2</sub> O | Total  | Mg# <sup>c, d</sup> | Cr# <sup>d</sup> | Fe <sup>3+</sup> # <sup>d</sup> |
|---------------|-----------------------------|----------------------|------------|------------------|------------------|--------------------------------|--------------------------------|--------------------|------|------|-------|-------|-------------------|------------------|--------|---------------------|------------------|---------------------------------|
|               | UTM coordinate <sup>a</sup> |                      |            |                  |                  |                                |                                |                    |      |      |       |       |                   |                  |        |                     |                  |                                 |
| 99120509      | Wadi Shuwayhah              | olivine              |            | 41.82            | 0.01             | 0.00                           | 0.01                           | 8.99               | 0.13 | 0.36 | 50.29 | 0.01  | 0.00              | 0.00             | 101.62 | 0.910               |                  |                                 |
|               | 0418.74 / 2704.79           | opx                  |            | 57.05            | 0.02             | 3.36                           | 0.45                           | 6.08               | 0.11 | 0.10 | 33.90 | 0.59  | 0.01              | 0.00             | 101.68 | 0.909               |                  |                                 |
|               |                             | cpx                  |            | 53.34            | 0.08             | 3.90                           | 0.83                           | 2.36               | 0.06 | 0.07 | 16.98 | 23.67 | 0.15              | 0.01             | 101.44 | 0.928               |                  |                                 |
|               |                             | spinel               |            | 0.03             | 0.02             | 45.53                          | 21.67                          | 15.28              | 0.17 | 0.25 | 17.39 | 0.01  | 0.01              | 0.00             | 100.35 | 0.715               | 0.242            | 0.015                           |
| 99120512      | Wadi Shuwayhah              | olivine <sup>e</sup> |            | 40.89            | –                | 0.00                           | 0.00                           | 9.28               | –    | –    | 49.10 | 0.00  | –                 | –                | 99.26  | 0.904               |                  |                                 |
|               | 0418.53 / 2705.32           | opx                  |            | 56.56            | 0.06             | 3.00                           | 0.61                           | 5.76               | 0.16 | 0.10 | 34.22 | 0.70  | 0.01              | 0.00             | 101.17 | 0.914               |                  |                                 |
|               |                             | cpx                  |            | 52.74            | 0.08             | 2.89                           | 0.94                           | 1.98               | 0.07 | 0.04 | 17.16 | 23.94 | 0.17              | 0.00             | 100.01 | 0.939               |                  |                                 |
|               |                             | spinel               |            | 0.12             | 0.06             | 38.47                          | 29.23                          | 15.39              | 0.19 | 0.15 | 16.34 | 0.01  | 0.01              | 0.00             | 99.96  | 0.693               | 0.338            | 0.013                           |
| 99120602      | Wadi Sumayni                | olivine <sup>e</sup> | 65.63      | 41.19            | –                | 0.00                           | 0.00                           | 9.19               | –    | –    | 48.98 | 0.04  | –                 | –                | 99.40  | 0.905               |                  |                                 |
|               | 0420.68 / 2705.84           | opx                  | 28.60      | 56.44            | 0.04             | 2.84                           | 0.64                           | 5.97               | 0.14 | 0.10 | 33.86 | 0.62  | 0.04              | 0.02             | 100.71 | 0.910               |                  |                                 |
|               |                             | cpx                  | 4.89       | 53.07            | 0.06             | 3.17                           | 1.04                           | 1.83               | 0.07 | 0.03 | 16.76 | 24.11 | 0.12              | 0.00             | 100.27 | 0.942               |                  |                                 |
|               |                             | spinel               | 0.69       | 0.23             | 0.06             | 35.86                          | 33.00                          | 15.46              | 0.20 | 0.12 | 15.49 | 0.01  | 0.02              | 0.00             | 100.44 | 0.661               | 0.382            | 0.007                           |
| 99120603      | Wadi Sumayni                | olivine <sup>e</sup> |            | 41.34            | –                | 0.00                           | 0.00                           | 9.53               | –    | –    | 49.64 | 0.04  | –                 | –                | 100.55 | 0.902               |                  |                                 |
|               | 0420.37 / 2706.74           | opx                  |            | 56.70            | 0.02             | 2.83                           | 0.68                           | 5.85               | 0.15 | 0.09 | 33.68 | 1.48  | 0.02              | 0.00             | 101.50 | 0.911               |                  |                                 |
|               |                             | cpx                  |            | 53.48            | 0.06             | 2.90                           | 0.90                           | 2.07               | 0.08 | 0.01 | 17.55 | 24.00 | 0.04              | 0.00             | 101.09 | 0.938               |                  |                                 |
|               |                             | spinel               |            | 0.03             | 0.01             | 34.23                          | 35.03                          | 17.35              | 0.23 | 0.19 | 15.04 | 0.01  | 0.01              | 0.00             | 102.14 | 0.646               | 0.407            | 0.014                           |
| 99120604      | Wadi Sumayni                | olivine <sup>e</sup> |            | 41.17            | –                | 0.00                           | 0.00                           | 9.06               | –    | –    | 49.18 | 0.01  | –                 | –                | 99.41  | 0.906               |                  |                                 |
|               | 0420.05 / 2707.21           | opx                  |            | 57.34            | 0.02             | 1.77                           | 0.57                           | 5.61               | 0.12 | 0.10 | 33.81 | 1.31  | 0.01              | 0.00             | 100.65 | 0.915               |                  |                                 |
|               |                             | cpx                  |            | 54.83            | 0.06             | 1.96                           | 0.83                           | 2.12               | 0.08 | 0.02 | 18.24 | 23.42 | 0.07              | 0.01             | 101.66 | 0.939               |                  |                                 |
|               |                             | spinel               |            | 0.08             | 0.07             | 23.99                          | 44.84                          | 17.83              | 0.26 | 0.09 | 13.17 | 0.02  | 0.01              | 0.00             | 100.37 | 0.601               | 0.556            | 0.013                           |
| 99120606      | Wadi Sumayni                | olivine <sup>e</sup> | 64.17      | 41.01            | –                | 0.00                           | 0.00                           | 9.56               | –    | –    | 48.91 | 0.01  | –                 | –                | 99.48  | 0.901               |                  |                                 |
|               | 0419.68 / 2707.63           | opx                  | 29.34      | 57.07            | 0.02             | 2.76                           | 0.69                           | 5.81               | 0.13 | 0.08 | 33.59 | 1.09  | 0.01              | 0.00             | 101.26 | 0.912               |                  |                                 |
|               |                             | cpx                  | 5.16       | 53.06            | 0.06             | 3.42                           | 1.14                           | 2.49               | 0.10 | 0.06 | 16.92 | 23.84 | 0.04              | 0.00             | 101.14 | 0.924               |                  |                                 |
|               |                             | spinel               | 0.54       | 0.17             | 0.04             | 34.68                          | 34.58                          | 16.16              | 0.21 | 0.13 | 15.19 | 0.02  | 0.01              | 0.00             | 101.18 | 0.651               | 0.401            | 0.009                           |
| 99120608      | Wadi Sumayni                | olivine              |            | 40.58            | 0.00             | 0.00                           | 0.01                           | 7.60               | 0.09 | 0.36 | 49.75 | 0.02  | 0.01              | 0.00             | 98.42  | 0.921               |                  |                                 |
|               | 0419.63 / 2705.79           | opx                  |            | 58.09            | 0.03             | 1.82                           | 0.65                           | 4.98               | 0.11 | 0.08 | 34.54 | 1.26  | 0.03              | 0.00             | 101.59 | 0.925               |                  |                                 |
|               |                             | cpx                  |            | –                | –                | –                              | –                              | –                  | –    | –    | –     | –     | –                 | –                | –      | –                   |                  |                                 |
|               |                             | spinel               |            | 0.04             | 0.10             | 22.74                          | 45.92                          | 16.94              | 0.20 | 0.06 | 13.61 | 0.00  | 0.01              | 0.00             | 99.63  | 0.625               | 0.575            | 0.014                           |
| 99120614      | Wadi Sumayni                | olivine <sup>e</sup> | 65.77      | 40.88            | –                | 0.00                           | 0.00                           | 8.99               | –    | –    | 48.99 | 0.02  | –                 | –                | 98.89  | 0.907               |                  |                                 |
|               | 0417.37 / 2705.95           | opx                  | 30.50      | 57.32            | 0.01             | 2.03                           | 0.56                           | 5.51               | 0.10 | 0.07 | 34.29 | 0.56  | 0.00              | 0.00             | 100.44 | 0.917               |                  |                                 |
|               |                             | cpx                  | 3.26       | 54.27            | 0.02             | 2.16                           | 0.89                           | 2.07               | 0.07 | 0.05 | 17.82 | 23.55 | 0.08              | 0.00             | 100.99 | 0.939               |                  |                                 |
|               |                             | spinel               | 0.61       | 0.17             | 0.06             | 25.21                          | 42.65                          | 18.36              | 0.25 | 0.14 | 13.37 | 0.01  | 0.01              | 0.00             | 100.23 | 0.606               | 0.532            | 0.017                           |
| 99120702      | Wadi Subakn                 | olivine <sup>e</sup> |            | 41.10            | –                | 0.00                           | 0.00                           | 9.34               | –    | –    | 49.77 | 0.01  | –                 | –                | 100.22 | 0.905               |                  |                                 |
|               | 0424.68 / 2712.79           | opx                  |            | 58.52            | 0.01             | 1.03                           | 0.33                           | 5.74               | 0.13 | 0.07 | 34.80 | 0.98  | 0.00              | 0.00             | 101.60 | 0.915               |                  |                                 |
|               |                             | cpx                  |            | 55.24            | 0.03             | 0.90                           | 0.39                           | 1.86               | 0.07 | 0.02 | 18.19 | 24.48 | 0.02              | 0.00             | 101.19 | 0.946               |                  |                                 |
|               |                             | spinel               |            | 0.25             | 0.08             | 15.35                          | 52.15                          | 22.28              | 0.29 | 0.07 | 10.34 | 0.01  | 0.01              | 0.00             | 100.82 | 0.494               | 0.695            | 0.021                           |

**Appendix 1. Continued**

| Reference No.     | Mineral              | Mode (wt%) | SiO <sub>2</sub> | TiO <sub>2</sub> | Al <sub>2</sub> O <sub>3</sub> | Cr <sub>2</sub> O <sub>3</sub> | FeO <sup>T b</sup> | MnO  | NiO  | MgO   | CaO   | Na <sub>2</sub> O | K <sub>2</sub> O | Total  | Mg# <sup>c, d</sup> | Cr# <sup>d</sup> | Fe <sup>3+</sup> # <sup>d</sup> |
|-------------------|----------------------|------------|------------------|------------------|--------------------------------|--------------------------------|--------------------|------|------|-------|-------|-------------------|------------------|--------|---------------------|------------------|---------------------------------|
| 99120704          | olivine <sup>e</sup> |            | 41.28            | –                | 0.00                           | 0.00                           | 9.14               | –    | –    | 49.92 | 0.00  | –                 | –                | 100.35 | 0.907               |                  |                                 |
| Wadi Subakn       | opx                  |            | 57.68            | 0.01             | 1.92                           | 0.64                           | 5.74               | 0.10 | 0.07 | 34.72 | 0.61  | 0.00              | 0.00             | 101.49 | 0.915               |                  |                                 |
| 0423.63 / 2713.05 | cpx                  |            | 54.82            | 0.05             | 1.68                           | 0.68                           | 2.00               | 0.06 | 0.04 | 17.90 | 24.04 | 0.04              | 0.00             | 101.33 | 0.941               |                  |                                 |
|                   | spinel               |            | 0.17             | 0.08             | 23.12                          | 44.65                          | 20.27              | 0.27 | 0.07 | 12.24 | 0.01  | 0.00              | 0.00             | 100.88 | 0.560               | 0.564            | 0.018                           |
| 99120706          | olivine              |            | 41.33            | 0.02             | 0.00                           | 0.02                           | 8.78               | 0.11 | 0.42 | 49.80 | 0.02  | 0.00              | 0.00             | 100.50 | 0.910               |                  |                                 |
| Wadi Subakn       | opx                  |            | 58.04            | 0.02             | 1.62                           | 0.43                           | 5.53               | 0.12 | 0.06 | 34.77 | 0.65  | 0.00              | 0.00             | 101.24 | 0.918               |                  |                                 |
| 0422.89 / 2713.79 | cpx                  |            | 53.95            | 0.02             | 1.75                           | 0.61                           | 1.87               | 0.07 | 0.04 | 17.86 | 23.21 | 0.02              | 0.00             | 99.41  | 0.945               |                  |                                 |
|                   | spinel               |            | 0.10             | 0.08             | 21.59                          | 45.13                          | 21.00              | 0.23 | 0.12 | 11.79 | 0.01  | 0.00              | 0.00             | 100.06 | 0.549               | 0.584            | 0.023                           |
| 99120901          | olivine <sup>e</sup> | 69.01      | 41.12            | –                | 0.00                           | 0.00                           | 9.43               | –    | –    | 49.70 | 0.01  | –                 | –                | 100.25 | 0.904               |                  |                                 |
| Wadi Hayl         | opx                  | 24.90      | 57.08            | 0.03             | 2.91                           | 0.72                           | 5.80               | 0.15 | 0.07 | 33.95 | 0.76  | 0.01              | 0.00             | 101.49 | 0.913               |                  |                                 |
| 0416.42 / 2708.05 | cpx                  | 4.56       | 53.62            | 0.06             | 3.23                           | 1.07                           | 2.03               | 0.07 | 0.06 | 17.03 | 24.48 | 0.04              | 0.00             | 101.70 | 0.937               |                  |                                 |
|                   | spinel               | 0.47       | 0.12             | 0.05             | 33.67                          | 34.45                          | 17.35              | 0.19 | 0.14 | 14.91 | 0.01  | 0.01              | 0.00             | 100.90 | 0.644               | 0.407            | 0.015                           |
| 99120903          | olivine <sup>e</sup> | 67.96      | 41.30            | –                | 0.00                           | 0.00                           | 8.94               | –    | –    | 49.72 | 0.03  | –                 | –                | 99.99  | 0.908               |                  |                                 |
| Wadi Hayl         | opx                  | 26.66      | 56.70            | 0.04             | 3.08                           | 0.82                           | 5.48               | 0.13 | 0.07 | 33.48 | 1.17  | 0.01              | 0.00             | 100.99 | 0.916               |                  |                                 |
| 0417.79 / 2707.32 | cpx                  | 3.61       | 52.78            | 0.07             | 3.92                           | 1.32                           | 2.06               | 0.07 | 0.07 | 16.44 | 24.05 | 0.09              | 0.00             | 100.86 | 0.934               |                  |                                 |
|                   | spinel               | 0.66       | 0.11             | 0.08             | 36.78                          | 32.36                          | 14.62              | 0.20 | 0.17 | 16.31 | 0.00  | 0.01              | 0.00             | 100.66 | 0.692               | 0.371            | 0.009                           |
| 99120904          | olivine <sup>e</sup> | 75.81      | 41.31            | –                | 0.00                           | 0.00                           | 8.48               | –    | –    | 49.94 | 0.03  | –                 | –                | 99.75  | 0.913               |                  |                                 |
| Wadi Hayl         | opx                  | 21.53      | 58.14            | 0.00             | 1.72                           | 0.53                           | 5.34               | 0.14 | 0.04 | 34.23 | 1.64  | 0.00              | 0.00             | 101.79 | 0.920               |                  |                                 |
| 0416.84 / 2709.53 | cpx                  | 0.92       | 54.91            | 0.01             | 2.05                           | 0.92                           | 2.09               | 0.03 | 0.10 | 18.31 | 23.35 | 0.05              | 0.00             | 101.83 | 0.940               |                  |                                 |
|                   | spinel               | 0.69       | 0.09             | 0.06             | 22.13                          | 47.68                          | 17.70              | 0.26 | 0.07 | 13.43 | 0.01  | 0.01              | 0.00             | 101.44 | 0.611               | 0.591            | 0.014                           |
| 99120907          | olivine <sup>e</sup> |            | 41.25            | –                | 0.00                           | 0.00                           | 9.18               | –    | –    | 49.36 | 0.03  | –                 | –                | 99.82  | 0.906               |                  |                                 |
| Wadi Hayl         | opx                  |            | 57.49            | 0.03             | 2.49                           | 0.63                           | 5.58               | 0.15 | 0.03 | 33.90 | 1.14  | 0.00              | 0.00             | 101.45 | 0.915               |                  |                                 |
| 0418.16 / 2709.21 | cpx                  |            | 53.73            | 0.05             | 2.80                           | 0.98                           | 2.03               | 0.05 | 0.04 | 17.25 | 23.98 | 0.05              | 0.00             | 100.96 | 0.938               |                  |                                 |
|                   | spinel               |            | 0.09             | 0.05             | 32.63                          | 37.06                          | 15.93              | 0.19 | 0.14 | 15.20 | 0.00  | 0.01              | 0.00             | 101.30 | 0.657               | 0.433            | 0.010                           |
| 99120910          | olivine              | 71.55      | 42.11            | 0.00             | 0.00                           | 0.04                           | 9.02               | 0.09 | 0.41 | 50.84 | 0.02  | 0.01              | 0.00             | 102.54 | 0.910               |                  |                                 |
| Wadi Hayl         | opx                  | 23.81      | 57.33            | 0.01             | 1.60                           | 0.59                           | 5.82               | 0.11 | 0.12 | 34.12 | 1.59  | 0.01              | 0.00             | 101.29 | 0.913               |                  |                                 |
| 0418.68 / 2709.53 | cpx                  | 1.14       | 54.73            | 0.02             | 1.94                           | 1.01                           | 1.93               | 0.07 | 0.05 | 17.44 | 24.25 | 0.17              | 0.00             | 101.63 | 0.941               |                  |                                 |
|                   | spinel               | 0.78       | 0.05             | 0.04             | 19.99                          | 49.15                          | 18.68              | 0.26 | 0.05 | 12.32 | 0.01  | 0.01              | 0.00             | 100.54 | 0.574               | 0.623            | 0.014                           |
| 99120911          | olivine              |            | 40.66            | 0.01             | 0.00                           | 0.01                           | 8.83               | 0.10 | 0.38 | 49.39 | 0.01  | 0.01              | 0.00             | 99.41  | 0.909               |                  |                                 |
| Wadi Hayl         | opx                  |            | 56.07            | 0.03             | 2.65                           | 0.63                           | 5.58               | 0.09 | 0.07 | 33.26 | 1.01  | 0.00              | 0.00             | 99.38  | 0.914               |                  |                                 |
| 0418.53 / 2709.89 | cpx                  |            | 53.54            | 0.03             | 2.19                           | 0.84                           | 2.07               | 0.09 | 0.07 | 17.67 | 22.57 | 0.05              | 0.00             | 99.12  | 0.938               |                  |                                 |
|                   | spinel               |            | 0.10             | 0.08             | 32.87                          | 34.80                          | 16.51              | 0.18 | 0.12 | 14.87 | 0.01  | 0.02              | 0.00             | 99.55  | 0.651               | 0.415            | 0.013                           |
| 99121001          | olivine              |            | 41.72            | 0.01             | 0.00                           | 0.02                           | 8.94               | 0.12 | 0.37 | 50.53 | 0.02  | 0.00              | 0.00             | 101.72 | 0.910               |                  |                                 |
| Wadi Hallalah     | opx                  |            | 57.57            | 0.02             | 1.83                           | 0.56                           | 5.91               | 0.14 | 0.09 | 34.48 | 0.81  | 0.03              | 0.00             | 101.42 | 0.912               |                  |                                 |
| 0416.26 / 2712.32 | cpx                  |            | 54.34            | 0.03             | 2.04                           | 0.73                           | 2.04               | 0.08 | 0.06 | 17.64 | 24.32 | 0.05              | 0.00             | 101.34 | 0.939               |                  |                                 |
|                   | spinel               |            | 0.00             | 0.04             | 24.83                          | 42.84                          | 19.46              | 0.30 | 0.06 | 12.92 | 0.05  | 0.01              | 0.00             | 100.51 | 0.591               | 0.537            | 0.021                           |

**Appendix 1. Continued**

| Reference No.     | Mineral              | Mode (wt%) | SiO <sub>2</sub> | TiO <sub>2</sub> | Al <sub>2</sub> O <sub>3</sub> | Cr <sub>2</sub> O <sub>3</sub> | FeO <sup>T b</sup> | MnO  | NiO  | MgO   | CaO   | Na <sub>2</sub> O | K <sub>2</sub> O | Total  | Mg# <sup>c, d</sup> | Cr# <sup>d</sup> | Fe <sup>3+</sup> # <sup>d</sup> |
|-------------------|----------------------|------------|------------------|------------------|--------------------------------|--------------------------------|--------------------|------|------|-------|-------|-------------------|------------------|--------|---------------------|------------------|---------------------------------|
| 99121005          | olivine              |            | 41.72            | 0.01             | 0.00                           | 0.01                           | 9.05               | 0.13 | 0.38 | 49.88 | 0.01  | 0.00              | 0.00             | 101.19 | 0.908               |                  |                                 |
| Wadi Hallalah     | opx                  |            | 57.36            | 0.02             | 1.70                           | 0.52                           | 5.92               | 0.12 | 0.10 | 34.37 | 0.59  | 0.00              | 0.00             | 100.69 | 0.912               |                  |                                 |
| 0417.26 / 2713.74 | cpx                  |            | 54.71            | 0.03             | 1.63                           | 0.63                           | 1.96               | 0.08 | 0.05 | 17.74 | 23.91 | 0.02              | 0.00             | 100.75 | 0.942               |                  |                                 |
|                   | spinel               |            | 0.07             | 0.07             | 22.85                          | 45.03                          | 19.16              | 0.22 | 0.08 | 12.25 | 0.00  | 0.00              | 0.00             | 99.74  | 0.567               | 0.569            | 0.015                           |
| 99121006          | olivine              |            | 40.90            | 0.01             | 0.00                           | 0.01                           | 8.56               | 0.10 | 0.35 | 49.82 | 0.02  | 0.01              | 0.00             | 99.78  | 0.912               |                  |                                 |
| Wadi Hallalah     | opx                  |            | 57.46            | 0.01             | 1.21                           | 0.39                           | 5.58               | 0.15 | 0.06 | 34.39 | 0.70  | 0.00              | 0.00             | 99.95  | 0.917               |                  |                                 |
| 0417.63 / 2714.32 | cpx                  |            | 54.51            | 0.03             | 1.24                           | 0.63                           | 1.80               | 0.08 | 0.04 | 17.75 | 24.05 | 0.08              | 0.00             | 100.20 | 0.946               |                  |                                 |
|                   | spinel               |            | 0.11             | 0.09             | 18.66                          | 48.86                          | 20.27              | 0.29 | 0.03 | 11.27 | 0.01  | 0.01              | 0.00             | 99.62  | 0.535               | 0.637            | 0.017                           |
| 99121007          | olivine              |            | 41.72            | 0.01             | 0.00                           | 0.03                           | 8.61               | 0.11 | 0.37 | 50.36 | 0.02  | 0.00              | 0.00             | 101.23 | 0.912               |                  |                                 |
| Wadi Hallalah     | opx                  |            | 57.55            | 0.02             | 1.59                           | 0.51                           | 5.72               | 0.14 | 0.07 | 34.29 | 0.91  | 0.01              | 0.00             | 100.80 | 0.914               |                  |                                 |
| 0418.05 / 2714.68 | cpx                  |            | 54.01            | 0.05             | 1.90                           | 0.88                           | 1.91               | 0.03 | 0.04 | 17.51 | 23.78 | 0.12              | 0.00             | 100.23 | 0.942               |                  |                                 |
|                   | spinel               |            | 0.06             | 0.04             | 22.59                          | 46.09                          | 19.21              | 0.26 | 0.04 | 12.37 | 0.01  | 0.01              | 0.00             | 100.67 | 0.569               | 0.578            | 0.015                           |
| 99121008          | olivine <sup>c</sup> |            | 41.33            | –                | 0.00                           | 0.00                           | 9.11               | –    | –    | 49.52 | 0.03  | –                 | –                | 99.99  | 0.906               |                  |                                 |
| Wadi Hallalah     | opx                  |            | 58.24            | 0.02             | 1.47                           | 0.51                           | 5.66               | 0.12 | 0.09 | 34.62 | 0.79  | 0.01              | 0.00             | 101.50 | 0.916               |                  |                                 |
| 0418.26 / 2715.05 | cpx                  |            | 54.63            | 0.04             | 1.79                           | 0.93                           | 1.97               | 0.04 | 0.05 | 17.88 | 23.41 | 0.25              | 0.00             | 100.99 | 0.942               |                  |                                 |
|                   | spinel               |            | 0.05             | 0.08             | 20.13                          | 48.31                          | 19.25              | 0.28 | 0.06 | 12.24 | 0.00  | 0.01              | 0.00             | 100.40 | 0.571               | 0.617            | 0.017                           |
| 99121009          | olivine              |            | 41.12            | 0.02             | 0.00                           | 0.00                           | 8.63               | 0.12 | 0.37 | 49.65 | 0.02  | 0.00              | 0.00             | 99.93  | 0.911               |                  |                                 |
| Wadi Hallalah     | opx                  |            | 57.11            | 0.01             | 2.18                           | 0.63                           | 5.49               | 0.10 | 0.08 | 33.86 | 1.58  | 0.00              | 0.00             | 101.04 | 0.917               |                  |                                 |
| 0418.16 / 2715.53 | cpx                  |            | 53.40            | 0.05             | 2.83                           | 1.16                           | 1.87               | 0.05 | 0.06 | 17.01 | 24.84 | 0.05              | 0.00             | 101.32 | 0.942               |                  |                                 |
|                   | spinel               |            | 0.05             | 0.05             | 27.00                          | 41.46                          | 17.45              | 0.23 | 0.07 | 14.03 | 0.00  | 0.00              | 0.00             | 100.33 | 0.629               | 0.507            | 0.015                           |
| 99121010          | olivine <sup>c</sup> | 72.82      | 41.23            | –                | 0.00                           | 0.00                           | 9.14               | –    | –    | 49.50 | 0.04  | –                 | –                | 99.91  | 0.906               |                  |                                 |
| Wadi Hallalah     | opx                  | 23.66      | 57.10            | 0.03             | 1.37                           | 0.45                           | 5.44               | 0.14 | 0.06 | 34.14 | 0.85  | 0.01              | 0.00             | 99.58  | 0.918               |                  |                                 |
| 0418.05 / 2716.11 | cpx                  | 2.53       | 55.45            | 0.01             | 1.59                           | 0.78                           | 2.85               | 0.09 | 0.01 | 21.18 | 19.28 | 0.14              | 0.00             | 101.39 | 0.934               |                  |                                 |
|                   | spinel               | 0.72       | 0.10             | 0.07             | 20.17                          | 48.38                          | 20.39              | 0.27 | 0.07 | 11.59 | 0.01  | 0.01              | 0.00             | 101.07 | 0.539               | 0.617            | 0.016                           |
| 99121011          | olivine              |            | 41.54            | 0.01             | 0.00                           | 0.00                           | 8.81               | 0.11 | 0.39 | 50.34 | 0.01  | 0.00              | 0.00             | 101.21 | 0.911               |                  |                                 |
| Wadi Hallalah     | opx                  |            | 58.07            | 0.02             | 1.47                           | 0.46                           | 5.79               | 0.13 | 0.09 | 34.88 | 0.64  | 0.00              | 0.00             | 101.56 | 0.915               |                  |                                 |
| 0417.58 / 2715.05 | cpx                  |            | 54.95            | 0.02             | 1.57                           | 0.67                           | 1.85               | 0.04 | 0.05 | 17.85 | 24.37 | 0.15              | 0.00             | 101.51 | 0.945               |                  |                                 |
|                   | spinel               |            | 0.05             | 0.05             | 23.16                          | 44.47                          | 20.33              | 0.29 | 0.08 | 11.79 | 0.01  | 0.00              | 0.00             | 100.23 | 0.546               | 0.563            | 0.017                           |
| 99121012          | olivine <sup>c</sup> | 77.13      | 41.27            | –                | 0.00                           | 0.00                           | 8.85               | –    | –    | 49.74 | 0.03  | –                 | –                | 99.88  | 0.908               |                  |                                 |
| Wadi Hallalah     | opx                  | 19.52      | 57.76            | 0.02             | 1.87                           | 0.55                           | 4.89               | 0.11 | 0.11 | 34.45 | 0.99  | 0.00              | 0.00             | 101.58 | 0.927               |                  |                                 |
| 0417.26 / 2715.32 | cpx                  | 1.62       | 54.70            | 0.05             | 1.97                           | 0.79                           | 1.90               | 0.07 | 0.03 | 17.66 | 24.32 | 0.09              | 0.00             | 101.58 | 0.943               |                  |                                 |
|                   | spinel               | 0.87       | 0.12             | 0.10             | 24.47                          | 43.24                          | 19.60              | 0.26 | 0.10 | 12.70 | 0.01  | 0.01              | 0.00             | 100.62 | 0.578               | 0.542            | 0.018                           |
| 99121013          | olivine <sup>c</sup> | 69.65      | 41.07            | –                | 0.00                           | 0.00                           | 9.26               | –    | –    | 49.40 | 0.02  | –                 | –                | 99.75  | 0.905               |                  |                                 |
| Wadi Hallalah     | opx                  | 26.45      | 57.85            | 0.01             | 1.82                           | 0.53                           | 5.76               | 0.14 | 0.09 | 34.54 | 0.90  | 0.00              | 0.00             | 101.64 | 0.914               |                  |                                 |
| 0417.58 / 2713.11 | cpx                  | 2.25       | 54.16            | 0.08             | 1.99                           | 0.89                           | 1.89               | 0.08 | 0.04 | 17.65 | 24.47 | 0.11              | 0.00             | 101.35 | 0.943               |                  |                                 |
|                   | spinel               | 0.55       | 0.10             | 0.08             | 24.35                          | 44.25                          | 19.36              | 0.23 | 0.08 | 12.77 | 0.01  | 0.01              | 0.00             | 101.23 | 0.578               | 0.549            | 0.016                           |

**Appendix 1. Continued**

| Reference No.     | Mineral              | Mode (wt%) | SiO <sub>2</sub> | TiO <sub>2</sub> | Al <sub>2</sub> O <sub>3</sub> | Cr <sub>2</sub> O <sub>3</sub> | FeO <sup>T b</sup> | MnO  | NiO  | MgO   | CaO   | Na <sub>2</sub> O | K <sub>2</sub> O | Total  | Mg# <sup>c, d</sup> | Cr# <sup>d</sup> | Fe <sup>3+</sup> # <sup>d</sup> |
|-------------------|----------------------|------------|------------------|------------------|--------------------------------|--------------------------------|--------------------|------|------|-------|-------|-------------------|------------------|--------|---------------------|------------------|---------------------------------|
| 99121101          | olivine <sup>e</sup> | 73.15      | 41.17            | –                | 0.00                           | 0.00                           | 9.02               | –    | –    | 49.42 | 0.03  | –                 | –                | 99.63  | 0.907               |                  |                                 |
| Wadi Hayl–Wadi    | opx                  | 21.74      | 56.78            | 0.01             | 2.66                           | 0.74                           | 5.78               | 0.15 | 0.08 | 34.02 | 0.89  | 0.01              | 0.00             | 101.13 | 0.913               |                  |                                 |
| Hallalah          | cpx                  | 3.51       | 52.73            | 0.03             | 2.88                           | 1.02                           | 2.07               | 0.06 | 0.03 | 17.04 | 24.26 | 0.02              | 0.01             | 100.15 | 0.936               |                  |                                 |
| 0416.89 / 2711.37 | spinel               | 0.64       | 0.19             | 0.05             | 30.19                          | 38.58                          | 16.35              | 0.24 | 0.13 | 14.51 | 0.00  | 0.01              | 0.00             | 100.25 | 0.639               | 0.462            | 0.010                           |
| 99121103          | olivine <sup>e</sup> |            | 41.05            | –                | 0.00                           | 0.00                           | 8.89               | –    | –    | 49.73 | 0.02  | –                 | –                | 99.69  | 0.908               |                  |                                 |
| Wadi Hayl–Wadi    | opx                  |            | 57.78            | 0.02             | 2.11                           | 0.62                           | 5.60               | 0.14 | 0.07 | 34.54 | 0.74  | 0.01              | 0.00             | 101.63 | 0.917               |                  |                                 |
| Hallalah          | cpx                  |            | 53.71            | 0.05             | 2.54                           | 0.96                           | 1.96               | 0.07 | 0.05 | 17.24 | 24.19 | 0.04              | 0.01             | 100.82 | 0.940               |                  |                                 |
| 0418.05 / 2711.26 | spinel               |            | 0.11             | 0.06             | 28.65                          | 40.98                          | 16.65              | 0.23 | 0.12 | 14.19 | 0.01  | 0.02              | 0.00             | 101.02 | 0.628               | 0.490            | 0.009                           |
| 99121104          | olivine              | 70.71      | 41.53            | 0.00             | 0.00                           | 0.01                           | 8.39               | 0.10 | 0.37 | 51.02 | 0.02  | 0.00              | 0.00             | 101.44 | 0.916               |                  |                                 |
| Wadi Hayl–Wadi    | opx                  | 25.12      | 57.09            | 0.00             | 2.12                           | 0.72                           | 5.41               | 0.12 | 0.07 | 34.75 | 0.93  | 0.01              | 0.00             | 101.22 | 0.920               |                  |                                 |
| Hallalah          | cpx                  | 1.68       | 54.30            | 0.03             | 2.10                           | 0.73                           | 1.90               | 0.04 | 0.03 | 17.84 | 24.02 | 0.03              | 0.00             | 101.01 | 0.944               |                  |                                 |
| 0418.37 / 2711.00 | spinel               | 0.59       | 0.06             | 0.03             | 26.79                          | 43.07                          | 17.33              | 0.23 | 0.08 | 14.22 | 0.01  | 0.01              | 0.00             | 101.83 | 0.630               | 0.519            | 0.014                           |
| 99121105          | olivine              |            | 41.74            | 0.01             | 0.00                           | 0.01                           | 8.43               | 0.12 | 0.39 | 50.76 | 0.01  | 0.00              | 0.00             | 101.47 | 0.915               |                  |                                 |
| Wadi Hayl–Wadi    | opx                  |            | 58.22            | 0.03             | 1.23                           | 0.40                           | 5.60               | 0.14 | 0.08 | 34.92 | 0.64  | 0.00              | 0.00             | 101.26 | 0.917               |                  |                                 |
| Hallalah          | cpx                  |            | 55.10            | 0.06             | 1.30                           | 0.48                           | 1.96               | 0.08 | 0.06 | 18.23 | 23.43 | 0.02              | 0.00             | 100.72 | 0.943               |                  |                                 |
| 0418.68 / 2711.42 | spinel               |            | 0.08             | 0.05             | 19.69                          | 48.77                          | 19.76              | 0.25 | 0.05 | 11.74 | 0.00  | 0.01              | 0.00             | 100.40 | 0.549               | 0.624            | 0.016                           |
| 99121106          | olivine <sup>e</sup> | 75.94      | 41.00            | –                | 0.00                           | 0.00                           | 8.51               | –    | –    | 49.25 | 0.02  | –                 | –                | 98.79  | 0.912               |                  |                                 |
| Wadi Hayl–Wadi    | opx                  | 21.15      | 57.10            | 0.01             | 1.89                           | 0.60                           | 5.63               | 0.12 | 0.11 | 34.18 | 1.06  | 0.00              | 0.00             | 100.72 | 0.915               |                  |                                 |
| Hallalah          | cpx                  | 2.42       | 54.21            | 0.02             | 1.81                           | 0.73                           | 1.92               | 0.07 | 0.05 | 17.70 | 24.34 | 0.01              | 0.00             | 100.85 | 0.943               |                  |                                 |
| 0418.89 / 2711.53 | spinel               | 0.78       | 0.14             | 0.05             | 24.82                          | 43.81                          | 18.17              | 0.25 | 0.06 | 13.13 | 0.02  | 0.01              | 0.00             | 100.47 | 0.595               | 0.542            | 0.013                           |
| 99121110          | olivine              | 73.25      | 41.79            | 0.01             | 0.00                           | 0.01                           | 8.33               | 0.11 | 0.38 | 50.74 | 0.01  | 0.01              | 0.00             | 101.39 | 0.916               |                  |                                 |
| Wadi Shuayhah     | opx                  | 23.27      | 58.19            | 0.01             | 0.88                           | 0.43                           | 5.45               | 0.12 | 0.09 | 35.14 | 0.89  | 0.00              | 0.00             | 101.20 | 0.920               |                  |                                 |
| 0425.53 / 2709.68 | cpx                  | 0.79       | 55.34            | 0.02             | 0.85                           | 0.47                           | 1.95               | 0.05 | 0.05 | 18.45 | 24.21 | 0.03              | 0.00             | 101.42 | 0.944               |                  |                                 |
|                   | spinel               | 0.84       | 0.01             | 0.05             | 12.76                          | 54.65                          | 22.04              | 0.33 | 0.09 | 10.17 | 0.00  | 0.02              | 0.00             | 100.10 | 0.500               | 0.742            | 0.025                           |
| 99121111          | olivine              | 78.32      | 41.48            | 0.01             | 0.01                           | 0.01                           | 8.32               | 0.13 | 0.37 | 50.52 | 0.02  | 0.01              | 0.00             | 100.87 | 0.915               |                  |                                 |
| Wadi Shuayhah     | opx                  | 18.75      | 57.61            | 0.01             | 1.26                           | 0.47                           | 5.66               | 0.14 | 0.11 | 34.84 | 0.67  | 0.01              | 0.00             | 100.78 | 0.917               |                  |                                 |
| 0426.53 / 2713.68 | cpx                  | 1.24       | 54.72            | 0.03             | 1.41                           | 0.47                           | 1.84               | 0.03 | 0.01 | 18.14 | 24.37 | 0.02              | 0.00             | 101.05 | 0.946               |                  |                                 |
|                   | spinel               | 0.96       | 0.02             | 0.04             | 18.23                          | 49.26                          | 21.35              | 0.29 | 0.09 | 11.23 | 0.01  | 0.01              | 0.00             | 100.52 | 0.533               | 0.644            | 0.023                           |
| 99121112          | olivine <sup>e</sup> |            | 41.14            | –                | 0.00                           | 0.00                           | 8.84               | –    | –    | 49.75 | 0.00  | –                 | –                | 99.73  | 0.909               |                  |                                 |
| Wadi Shuayhah     | opx                  |            | 58.20            | 0.02             | 1.38                           | 0.49                           | 5.62               | 0.14 | 0.08 | 34.97 | 0.79  | 0.00              | 0.00             | 101.69 | 0.917               |                  |                                 |
| 0426.84 / 2711.05 | cpx                  |            | –                | –                | –                              | –                              | –                  | –    | –    | –     | –     | –                 | –                | –      | –                   |                  |                                 |
|                   | spinel               |            | 0.21             | 0.08             | 18.16                          | 48.83                          | 21.76              | 0.29 | 0.09 | 11.30 | 0.00  | 0.01              | 0.00             | 100.72 | 0.531               | 0.643            | 0.024                           |
| 99121303          | olivine <sup>e</sup> |            | 40.59            | –                | 0.00                           | 0.00                           | 12.52              | –    | –    | 46.62 | 0.03  | –                 | –                | 99.76  | 0.869               |                  |                                 |
| Wadi Zabin        | opx                  |            | 57.29            | 0.05             | 1.77                           | 0.52                           | 7.89               | 0.13 | 0.10 | 33.07 | 0.61  | 0.01              | 0.00             | 101.44 | 0.882               |                  |                                 |
| 0417.79 / 2722.79 | cpx                  |            | –                | –                | –                              | –                              | –                  | –    | –    | –     | –     | –                 | –                | –      | –                   |                  |                                 |
|                   | spinel               |            | 0.14             | 0.14             | 19.39                          | 45.82                          | 25.07              | 0.27 | 0.08 | 10.25 | 0.01  | 0.01              | 0.00             | 101.17 | 0.480               | 0.613            | 0.033                           |



**Appendix 1. Continued**

| Reference No.               | Mineral              | Mode (wt%) | SiO <sub>2</sub> | TiO <sub>2</sub> | Al <sub>2</sub> O <sub>3</sub> | Cr <sub>2</sub> O <sub>3</sub> | FeO <sup>Tb</sup> | MnO  | NiO  | MgO   | CaO   | Na <sub>2</sub> O | K <sub>2</sub> O | Total  | Mg# <sup>c, d</sup> | Cr# <sup>d</sup> | Fe <sup>3+</sup> # <sup>d</sup> |
|-----------------------------|----------------------|------------|------------------|------------------|--------------------------------|--------------------------------|-------------------|------|------|-------|-------|-------------------|------------------|--------|---------------------|------------------|---------------------------------|
| UTM coordinate <sup>a</sup> |                      |            |                  |                  |                                |                                |                   |      |      |       |       |                   |                  |        |                     |                  |                                 |
| 99121304                    | olivine <sup>c</sup> |            | 40.90            | –                | 0.00                           | 0.00                           | 9.15              | –    | –    | 49.29 | 0.03  | –                 | –                | 99.37  | 0.906               |                  |                                 |
| Wadi Zabin                  | opx                  |            | 57.71            | 0.02             | 1.92                           | 0.62                           | 5.60              | 0.08 | 0.01 | 33.92 | 1.64  | 0.01              | 0.00             | 101.52 | 0.915               |                  |                                 |
| 0418.89 / 2722.79           | cpx                  |            | 54.24            | 0.01             | 2.27                           | 0.96                           | 1.97              | 0.06 | 0.06 | 17.25 | 24.42 | 0.13              | 0.00             | 101.37 | 0.940               |                  |                                 |
|                             | spinel               |            | 0.11             | 0.05             | 23.62                          | 43.99                          | 20.12             | 0.27 | 0.10 | 12.51 | 0.00  | 0.01              | 0.00             | 100.78 | 0.572               | 0.555            | 0.020                           |
| 99121305                    | olivine <sup>c</sup> | 64.95      | 41.28            | –                | 0.00                           | 0.00                           | 8.51              | –    | –    | 49.25 | 0.02  | –                 | –                | 99.06  | 0.904               |                  |                                 |
| Wadi Zabin                  | opx                  | 31.70      | 57.98            | 0.02             | 1.59                           | 0.46                           | 5.83              | 0.11 | 0.12 | 34.41 | 1.05  | 0.02              | 0.00             | 101.59 | 0.913               |                  |                                 |
| 0420.05 / 2722.32           | cpx                  | 1.98       | 54.63            | 0.02             | 1.94                           | 0.91                           | 1.77              | 0.08 | 0.03 | 17.67 | 24.42 | 0.07              | 0.00             | 101.54 | 0.947               |                  |                                 |
|                             | spinel               | 0.49       | 0.26             | 0.05             | 20.42                          | 46.50                          | 21.19             | 0.23 | 0.11 | 11.79 | 0.01  | 0.02              | 0.00             | 100.56 | 0.547               | 0.604            | 0.023                           |
| 99121306                    | olivine              |            | 41.12            | 0.00             | 0.01                           | 0.02                           | 11.62             | 0.12 | 0.39 | 48.43 | 0.01  | 0.00              | 0.00             | 101.71 | 0.881               |                  |                                 |
| Wadi Zabin                  | opx                  |            | 57.11            | 0.01             | 2.00                           | 0.45                           | 6.06              | 0.12 | 0.08 | 35.15 | 0.61  | 0.01              | 0.00             | 101.58 | 0.912               |                  |                                 |
| 0418.26 / 2722.47           | cpx                  |            | 53.30            | 0.15             | 2.63                           | 0.62                           | 2.46              | 0.07 | 0.05 | 18.18 | 23.08 | 0.16              | 0.00             | 100.69 | 0.930               |                  |                                 |
|                             | spinel               |            | 0.05             | 0.05             | 26.20                          | 39.20                          | 22.52             | 0.25 | 0.08 | 12.49 | 0.01  | 0.00              | 0.00             | 100.84 | 0.566               | 0.501            | 0.032                           |
| 99121401                    | olivine              | 51.79      | 41.92            | 0.01             | 0.00                           | 0.00                           | 8.44              | 0.13 | 0.40 | 51.28 | 0.01  | 0.00              | 0.00             | 102.19 | 0.915               |                  |                                 |
| Wadi Zabin                  | opx                  | 42.08      | 57.51            | 0.01             | 1.59                           | 0.49                           | 5.66              | 0.13 | 0.07 | 34.97 | 0.78  | 0.00              | 0.00             | 101.20 | 0.917               |                  |                                 |
| 0417.89 / 2722.11           | cpx                  | 2.62       | 54.71            | 0.03             | 1.73                           | 0.67                           | 1.94              | 0.06 | 0.03 | 17.89 | 23.68 | 0.12              | 0.00             | 100.85 | 0.943               |                  |                                 |
|                             | spinel               | 1.30       | 0.10             | 0.06             | 21.37                          | 45.88                          | 20.82             | 0.26 | 0.09 | 12.38 | 0.01  | 0.01              | 0.00             | 100.97 | 0.571               | 0.590            | 0.025                           |
| 99121403                    | olivine              | 71.51      | 40.89            | 0.00             | 0.00                           | 0.02                           | 8.58              | 0.10 | 0.42 | 50.56 | 0.02  | 0.00              | 0.00             | 100.60 | 0.913               |                  |                                 |
| Wadi Zabin                  | opx                  | 24.25      | 58.00            | 0.01             | 1.45                           | 0.53                           | 5.63              | 0.13 | 0.06 | 34.83 | 0.67  | 0.00              | 0.00             | 101.32 | 0.917               |                  |                                 |
| 0418.16 / 2721.63           | cpx                  | 2.14       | 55.11            | 0.02             | 1.30                           | 0.49                           | 1.88              | 0.08 | 0.03 | 17.91 | 24.44 | 0.04              | 0.00             | 101.30 | 0.944               |                  |                                 |
|                             | spinel               | 0.92       | 0.08             | 0.04             | 18.69                          | 48.07                          | 21.63             | 0.26 | 0.06 | 11.43 | 0.01  | 0.01              | 0.00             | 100.29 | 0.540               | 0.633            | 0.026                           |
| 99121405                    | olivine <sup>c</sup> | 68.56      | 40.89            | –                | 0.00                           | 0.00                           | 9.28              | –    | –    | 49.36 | 0.04  | –                 | –                | 99.57  | 0.905               |                  |                                 |
| Wadi Zabin                  | opx                  | 28.04      | 58.14            | 0.02             | 1.05                           | 0.43                           | 5.80              | 0.15 | 0.10 | 34.88 | 1.15  | 0.01              | 0.00             | 101.73 | 0.915               |                  |                                 |
| 0417.68 / 2720.74           | cpx                  | 2.33       | 54.89            | 0.02             | 1.40                           | 0.87                           | 1.99              | 0.06 | 0.05 | 18.35 | 23.57 | 0.14              | 0.01             | 101.35 | 0.943               |                  |                                 |
|                             | spinel               | 0.63       | 0.06             | 0.03             | 15.80                          | 51.92                          | 22.16             | 0.28 | 0.05 | 10.47 | 0.01  | 0.01              | 0.00             | 100.79 | 0.502               | 0.688            | 0.023                           |
| 99121407                    | olivine <sup>c</sup> | 73.17      | 41.02            | –                | 0.00                           | 0.00                           | 8.79              | –    | –    | 49.54 | 0.04  | –                 | –                | 99.39  | 0.903               |                  |                                 |
| Wadi Zabin                  | opx                  | 21.83      | 57.99            | 0.03             | 1.71                           | 0.55                           | 5.72              | 0.13 | 0.04 | 34.82 | 0.60  | 0.01              | 0.00             | 101.59 | 0.916               |                  |                                 |
| 0419.11 / 2720.53           | cpx                  | 3.62       | 54.35            | 0.02             | 2.13                           | 0.95                           | 1.81              | 0.08 | 0.06 | 17.37 | 24.73 | 0.01              | 0.00             | 101.50 | 0.945               |                  |                                 |
|                             | spinel               | 0.66       | 0.07             | 0.03             | 21.92                          | 45.75                          | 20.81             | 0.27 | 0.08 | 12.28 | 0.00  | 0.00              | 0.00             | 101.22 | 0.565               | 0.583            | 0.023                           |
| 99121408                    | olivine              |            | 39.74            | 0.00             | 0.00                           | 0.00                           | 9.29              | 0.11 | 0.43 | 51.56 | 0.01  | 0.00              | 0.00             | 101.16 | 0.908               |                  |                                 |
| Wadi Zabin                  | opx                  |            | 57.26            | 0.02             | 1.36                           | 0.49                           | 5.82              | 0.12 | 0.09 | 34.56 | 1.09  | 0.00              | 0.00             | 100.80 | 0.914               |                  |                                 |
| 0419.63 / 2720.16           | cpx                  |            | 53.62            | 0.01             | 1.59                           | 0.88                           | 2.01              | 0.06 | 0.02 | 18.12 | 24.58 | 0.12              | 0.00             | 100.99 | 0.941               |                  |                                 |
|                             | spinel               |            | 0.05             | 0.07             | 17.86                          | 46.78                          | 23.40             | 0.26 | 0.06 | 11.64 | 0.01  | 0.00              | 0.00             | 100.14 | 0.552               | 0.637            | 0.041                           |
| 99121410                    | olivine              | 71.26      | 40.01            | 0.00             | 0.01                           | 0.01                           | 8.89              | 0.08 | 0.33 | 51.76 | 0.03  | 0.00              | 0.00             | 101.12 | 0.912               |                  |                                 |
| Wadi Zabin                  | opx                  | 25.46      | 56.93            | 0.01             | 1.20                           | 0.46                           | 5.72              | 0.15 | 0.10 | 35.59 | 0.77  | 0.01              | 0.00             | 100.94 | 0.917               |                  |                                 |
| 0419.47 / 2718.84           | cpx                  | 1.11       | 55.09            | 0.02             | 1.30                           | 0.77                           | 1.74              | 0.05 | 0.09 | 17.82 | 24.41 | 0.14              | 0.00             | 101.44 | 0.948               |                  |                                 |
|                             | spinel               | 0.70       | 0.04             | 0.05             | 17.44                          | 48.49                          | 22.89             | 0.28 | 0.06 | 11.29 | 0.01  | 0.00              | 0.00             | 100.54 | 0.537               | 0.651            | 0.034                           |

**Appendix 1. Continued**

| Reference No.               | Mineral              | Mode (wt%) | SiO <sub>2</sub> | TiO <sub>2</sub> | Al <sub>2</sub> O <sub>3</sub> | Cr <sub>2</sub> O <sub>3</sub> | FeO <sup>Tb</sup> | MnO  | NiO  | MgO   | CaO   | Na <sub>2</sub> O | K <sub>2</sub> O | Total  | Mg# <sup>c, d</sup> | Cr# <sup>d</sup> | Fe <sup>3+</sup> # <sup>d</sup> |
|-----------------------------|----------------------|------------|------------------|------------------|--------------------------------|--------------------------------|-------------------|------|------|-------|-------|-------------------|------------------|--------|---------------------|------------------|---------------------------------|
| UTM coordinate <sup>a</sup> |                      |            |                  |                  |                                |                                |                   |      |      |       |       |                   |                  |        |                     |                  |                                 |
| 99121411                    | olivine              |            | 40.08            | 0.00             | 0.00                           | 0.02                           | 9.21              | 0.14 | 0.47 | 51.09 | 0.02  | 0.00              | 0.00             | 101.03 | 0.908               |                  |                                 |
| Wadi Zabin                  | opx                  |            | 56.22            | 0.01             | 1.40                           | 0.40                           | 6.00              | 0.14 | 0.12 | 35.00 | 1.00  | 0.01              | 0.00             | 100.29 | 0.912               |                  |                                 |
| 0419.63 / 2718.37           | cpx                  |            | 54.23            | 0.02             | 1.93                           | 0.84                           | 2.05              | 0.07 | 0.04 | 17.51 | 24.32 | 0.08              | 0.00             | 101.09 | 0.938               |                  |                                 |
|                             | spinel               |            | 0.30             | 0.03             | 18.99                          | 48.63                          | 21.24             | 0.26 | 0.08 | 11.50 | 0.00  | 0.00              | 0.00             | 101.04 | 0.535               | 0.632            | 0.021                           |
| 99121412                    | olivine              | 71.27      | 41.28            | 0.01             | 0.00                           | 0.02                           | 8.17              | 0.11 | 0.38 | 51.15 | 0.01  | 0.00              | 0.00             | 101.13 | 0.918               |                  |                                 |
| Wadi Zabin                  | opx                  | 25.57      | 57.08            | 0.02             | 1.92                           | 0.64                           | 5.40              | 0.10 | 0.07 | 34.64 | 0.70  | 0.01              | 0.00             | 100.57 | 0.920               |                  |                                 |
| 0417.05 / 2722.84           | cpx                  | 1.40       | 54.86            | 0.03             | 1.84                           | 0.81                           | 1.89              | 0.06 | 0.02 | 17.89 | 24.16 | 0.14              | 0.00             | 101.68 | 0.944               |                  |                                 |
|                             | spinel               | 0.72       | 0.09             | 0.03             | 22.55                          | 45.27                          | 20.65             | 0.25 | 0.07 | 12.47 | 0.02  | 0.00              | 0.00             | 101.40 | 0.570               | 0.574            | 0.023                           |
| 99121701                    | olivine <sup>e</sup> | 68.82      | 41.07            | –                | 0.00                           | 0.00                           | 9.02              | –    | –    | 49.42 | 0.01  | –                 | –                | 99.52  | 0.907               |                  |                                 |
| Wadi Mabir                  | opx                  | 27.15      | 57.87            | 0.01             | 1.90                           | 0.51                           | 5.73              | 0.10 | 0.11 | 34.45 | 0.94  | 0.01              | 0.00             | 101.63 | 0.915               |                  |                                 |
| 0419.32 / 2724.89           | cpx                  | 2.65       | 54.01            | 0.03             | 2.44                           | 1.01                           | 2.50              | 0.05 | 0.04 | 17.46 | 23.19 | 0.34              | 0.00             | 101.08 | 0.926               |                  |                                 |
|                             | spinel               | 0.76       | 0.06             | 0.04             | 24.62                          | 41.06                          | 22.44             | 0.25 | 0.13 | 11.97 | 0.00  | 0.00              | 0.00             | 100.57 | 0.550               | 0.528            | 0.029                           |
| 99121702                    | olivine <sup>e</sup> |            | 41.13            | –                | 0.00                           | 0.00                           | 8.84              | –    | –    | 49.17 | 0.00  | –                 | –                | 99.14  | 0.908               |                  |                                 |
| Wadi Mabir                  | opx                  |            | 57.17            | 0.02             | 1.89                           | 0.53                           | 5.83              | 0.13 | 0.09 | 34.08 | 1.02  | 0.01              | 0.00             | 100.76 | 0.912               |                  |                                 |
| 0419.79 / 2724.37           | cpx                  |            | 53.77            | 0.02             | 2.19                           | 0.82                           | 2.17              | 0.09 | 0.03 | 17.62 | 23.58 | 0.08              | 0.00             | 100.37 | 0.936               |                  |                                 |
|                             | spinel               |            | 0.09             | 0.02             | 25.58                          | 41.24                          | 20.36             | 0.26 | 0.07 | 12.43 | 0.02  | 0.01              | 0.00             | 100.07 | 0.568               | 0.520            | 0.021                           |
| 99121703                    | olivine <sup>e</sup> |            | 41.30            | –                | 0.00                           | 0.00                           | 9.11              | –    | –    | 49.40 | 0.02  | –                 | –                | 99.82  | 0.906               |                  |                                 |
| Wadi Mabir                  | opx                  |            | 56.47            | 0.02             | 2.03                           | 0.53                           | 5.85              | 0.11 | 0.10 | 34.14 | 0.93  | 0.00              | 0.00             | 100.19 | 0.912               |                  |                                 |
| 0421.05 / 2724.00           | cpx                  |            | 53.11            | 0.00             | 2.47                           | 0.90                           | 2.45              | 0.10 | 0.04 | 18.02 | 22.98 | 0.01              | 0.00             | 100.07 | 0.929               |                  |                                 |
|                             | spinel               |            | 0.12             | 0.04             | 27.36                          | 39.62                          | 19.07             | 0.21 | 0.12 | 13.14 | 0.01  | 0.01              | 0.00             | 99.70  | 0.594               | 0.493            | 0.018                           |
| 99121804                    | olivine              |            | 42.00            | 0.01             | 0.01                           | 0.03                           | 8.62              | 0.11 | 0.40 | 51.11 | 0.02  | 0.01              | 0.00             | 102.31 | 0.914               |                  |                                 |
| Wadi Rajmi                  | opx                  |            | 57.19            | 0.01             | 1.94                           | 0.54                           | 5.80              | 0.13 | 0.08 | 34.52 | 1.13  | 0.02              | 0.00             | 101.35 | 0.914               |                  |                                 |
| 0422.05 / 2726.47           | cpx                  |            | 54.01            | 0.07             | 2.40                           | 0.91                           | 2.45              | 0.10 | 0.03 | 19.18 | 21.86 | 0.24              | 0.00             | 101.25 | 0.933               |                  |                                 |
|                             | spinel               |            | 0.05             | 0.03             | 25.38                          | 41.07                          | 20.77             | 0.27 | 0.12 | 13.24 | 0.00  | 0.01              | 0.00             | 100.94 | 0.600               | 0.520            | 0.030                           |
| 99121805                    | olivine              |            | 41.86            | 0.01             | 0.00                           | 0.04                           | 8.46              | 0.12 | 0.37 | 50.85 | 0.02  | 0.01              | 0.00             | 101.73 | 0.915               |                  |                                 |
| Wadi Rajmi                  | opx                  |            | 56.54            | 0.00             | 2.04                           | 0.62                           | 5.54              | 0.14 | 0.08 | 34.18 | 1.18  | 0.00              | 0.00             | 100.31 | 0.917               |                  |                                 |
| 0422.16 / 2725.58           | cpx                  |            | 54.31            | 0.00             | 2.32                           | 0.89                           | 2.07              | 0.04 | 0.04 | 18.01 | 23.44 | 0.17              | 0.00             | 101.31 | 0.940               |                  |                                 |
|                             | spinel               |            | 0.02             | 0.02             | 27.25                          | 40.70                          | 18.25             | 0.21 | 0.12 | 13.79 | 0.01  | 0.01              | 0.00             | 100.36 | 0.620               | 0.501            | 0.018                           |
| 99121806                    | olivine              | 58.44      | 41.79            | 0.00             | 0.00                           | 0.00                           | 8.52              | 0.12 | 0.39 | 50.55 | 0.01  | 0.00              | 0.00             | 101.39 | 0.914               |                  |                                 |
| Wadi Rajmi                  | opx                  | 32.06      | 56.77            | 0.02             | 2.21                           | 0.69                           | 5.27              | 0.12 | 0.06 | 33.87 | 1.67  | 0.00              | 0.00             | 100.69 | 0.920               |                  |                                 |
| 0421.84 / 2725.16           | cpx                  | 6.64       | 54.54            | 0.05             | 1.90                           | 0.67                           | 1.91              | 0.07 | 0.05 | 17.79 | 24.07 | 0.06              | 0.00             | 101.10 | 0.943               |                  |                                 |
|                             | spinel               | 0.85       | 0.05             | 0.05             | 27.63                          | 40.88                          | 18.06             | 0.21 | 0.10 | 14.04 | 0.00  | 0.02              | 0.00             | 101.04 | 0.625               | 0.498            | 0.017                           |
| 99121807                    | olivine              |            | 41.73            | 0.01             | 0.00                           | 0.03                           | 8.84              | 0.12 | 0.39 | 50.24 | 0.01  | 0.00              | 0.00             | 101.36 | 0.910               |                  |                                 |
| Wadi Rajmi                  | opx                  |            | 56.84            | 0.01             | 2.00                           | 0.58                           | 5.76              | 0.16 | 0.10 | 34.22 | 1.25  | 0.02              | 0.00             | 100.94 | 0.914               |                  |                                 |
| 0421.84 / 2725.16           | cpx                  |            | 53.08            | 0.01             | 2.43                           | 0.87                           | 2.27              | 0.10 | 0.04 | 17.37 | 24.56 | 0.03              | 0.01             | 100.76 | 0.932               |                  |                                 |
|                             | spinel               |            | 0.06             | 0.07             | 26.59                          | 40.17                          | 20.82             | 0.26 | 0.10 | 12.65 | 0.01  | 0.01              | 0.00             | 100.75 | 0.572               | 0.503            | 0.023                           |

**Appendix 1. Continued**

| Reference No.     | Mineral | Mode (wt%) | SiO <sub>2</sub> | TiO <sub>2</sub> | Al <sub>2</sub> O <sub>3</sub> | Cr <sub>2</sub> O <sub>3</sub> | FeO <sup>T b</sup> | MnO  | NiO  | MgO   | CaO   | Na <sub>2</sub> O | K <sub>2</sub> O | Total  | Mg# <sup>c, d</sup> | Cr# <sup>d</sup> | Fe <sup>3+</sup> # <sup>d</sup> |
|-------------------|---------|------------|------------------|------------------|--------------------------------|--------------------------------|--------------------|------|------|-------|-------|-------------------|------------------|--------|---------------------|------------------|---------------------------------|
| 99121808          | olivine | 62.62      | 41.35            | 0.01             | 0.00                           | 0.02                           | 8.37               | 0.12 | 0.31 | 51.16 | 0.01  | 0.00              | 0.00             | 101.36 | 0.916               |                  |                                 |
| Wadi Rajmi        | opx     | 32.36      | 56.77            | 0.05             | 2.34                           | 0.56                           | 5.47               | 0.09 | 0.12 | 34.53 | 1.32  | 0.00              | 0.00             | 101.24 | 0.918               |                  |                                 |
| 0422.37 / 2726.11 | cpx     | 2.32       | 53.65            | 0.03             | 2.18                           | 0.80                           | 1.79               | 0.04 | 0.03 | 17.03 | 24.55 | 0.11              | 0.00             | 100.20 | 0.944               |                  |                                 |
|                   | spinel  | 0.94       | 0.12             | 0.06             | 29.22                          | 39.33                          | 17.86              | 0.21 | 0.07 | 14.61 | 0.02  | 0.00              | 0.00             | 101.51 | 0.640               | 0.474            | 0.018                           |
| 00121901          | olivine |            | 41.52            | 0.01             | 0.00                           | 0.01                           | 8.66               | 0.10 | 0.38 | 50.75 | 0.02  | 0.01              | 0.00             | 101.45 | 0.913               |                  |                                 |
| Wadi Rajmi        | opx     |            | 57.29            | 0.04             | 2.86                           | 0.75                           | 5.80               | 0.09 | 0.11 | 34.09 | 0.60  | 0.00              | 0.00             | 101.63 | 0.913               |                  |                                 |
| 0423.16 / 2719.68 | cpx     |            | 53.60            | 0.10             | 3.05                           | 1.03                           | 1.99               | 0.07 | 0.04 | 17.03 | 24.29 | 0.03              | 0.00             | 101.24 | 0.938               |                  |                                 |
|                   | spinel  |            | 0.02             | 0.08             | 33.26                          | 34.93                          | 16.69              | 0.20 | 0.14 | 15.45 | 0.01  | 0.00              | 0.00             | 100.78 | 0.669               | 0.413            | 0.017                           |
| 00121902          | olivine | 71.49      | 41.03            | 0.00             | 0.00                           | 0.02                           | 8.58               | 0.15 | 0.39 | 50.34 | 0.01  | 0.00              | 0.00             | 100.53 | 0.913               |                  |                                 |
| Wadi Rajmi        | opx     | 24.33      | 57.75            | 0.03             | 2.20                           | 0.56                           | 5.66               | 0.12 | 0.10 | 34.48 | 0.63  | 0.00              | 0.00             | 101.52 | 0.916               |                  |                                 |
| 0422.63 / 2719.42 | cpx     | 2.32       | 54.78            | 0.03             | 1.92                           | 0.60                           | 1.96               | 0.06 | 0.02 | 17.83 | 24.06 | 0.05              | 0.00             | 101.30 | 0.942               |                  |                                 |
|                   | spinel  | 0.69       | 0.02             | 0.05             | 29.56                          | 38.38                          | 17.97              | 0.21 | 0.13 | 14.39 | 0.00  | 0.01              | 0.00             | 100.73 | 0.637               | 0.466            | 0.019                           |
| 00121908          | olivine | 69.49      | 41.80            | 0.00             | 0.00                           | 0.03                           | 8.72               | 0.09 | 0.38 | 51.00 | 0.01  | 0.00              | 0.00             | 102.05 | 0.912               |                  |                                 |
| Wadi Rajmi        | opx     | 22.43      | 57.89            | 0.01             | 2.19                           | 0.59                           | 5.46               | 0.15 | 0.06 | 34.52 | 0.79  | 0.00              | 0.00             | 101.66 | 0.919               |                  |                                 |
| 0422.21 / 2719.68 | cpx     | 5.02       | 56.27            | 0.05             | 4.30                           | 0.55                           | 2.74               | 0.05 | 0.07 | 23.04 | 12.86 | 0.30              | 0.04             | 100.26 | 0.937               |                  |                                 |
|                   | spinel  | 0.66       | 0.03             | 0.06             | 27.11                          | 41.23                          | 18.59              | 0.23 | 0.09 | 14.14 | 0.01  | 0.01              | 0.00             | 101.48 | 0.629               | 0.505            | 0.021                           |
| 00121909          | olivine |            | 41.43            | 0.00             | 0.01                           | 0.03                           | 8.42               | 0.11 | 0.41 | 50.43 | 0.01  | 0.00              | 0.00             | 100.84 | 0.914               |                  |                                 |
| Wadi Rajmi        | opx     |            | 58.13            | 0.02             | 1.60                           | 0.56                           | 5.54               | 0.13 | 0.08 | 34.70 | 0.81  | 0.01              | 0.00             | 101.57 | 0.918               |                  |                                 |
| 0422.58 / 2720.11 | cpx     |            | 54.62            | 0.04             | 1.91                           | 1.00                           | 1.95               | 0.08 | 0.01 | 17.63 | 23.48 | 0.17              | 0.00             | 100.89 | 0.942               |                  |                                 |
|                   | spinel  |            | 0.02             | 0.06             | 23.11                          | 45.47                          | 19.42              | 0.26 | 0.11 | 12.62 | 0.00  | 0.02              | 0.00             | 101.09 | 0.578               | 0.569            | 0.018                           |
| 00122202          | olivine |            | 41.42            | 0.01             | 0.00                           | 0.01                           | 8.57               | 0.10 | 0.41 | 49.97 | 0.01  | 0.00              | 0.00             | 100.50 | 0.912               |                  |                                 |
| Wadi Subakh       | opx     |            | 58.31            | 0.01             | 1.06                           | 0.48                           | 5.63               | 0.16 | 0.10 | 34.78 | 0.96  | 0.00              | 0.00             | 101.49 | 0.917               |                  |                                 |
| 0419.89 / 2714.89 | cpx     |            | –                | –                | –                              | –                              | –                  | –    | –    | –     | –     | –                 | –                | –      | –                   |                  |                                 |
|                   | spinel  |            | 0.02             | 0.08             | 15.22                          | 52.49                          | 20.86              | 0.29 | 0.06 | 10.98 | 0.01  | 0.00              | 0.00             | 100.01 | 0.530               | 0.698            | 0.022                           |
| 00122203          | olivine | 64.54      | 41.14            | 0.01             | 0.00                           | 0.03                           | 8.93               | 0.13 | 0.37 | 49.75 | 0.01  | 0.00              | 0.00             | 100.38 | 0.909               |                  |                                 |
| Wadi Subakh       | opx     | 29.68      | 56.41            | 0.03             | 2.09                           | 0.55                           | 5.87               | 0.13 | 0.10 | 34.07 | 0.55  | 0.00              | 0.00             | 99.79  | 0.912               |                  |                                 |
| 0419.37 / 2715.68 | cpx     | 4.71       | 52.97            | 0.04             | 2.44                           | 0.88                           | 2.28               | 0.04 | 0.04 | 17.78 | 23.30 | 0.03              | 0.00             | 99.81  | 0.933               |                  |                                 |
|                   | spinel  | 0.75       | 0.03             | 0.06             | 27.45                          | 39.93                          | 18.53              | 0.22 | 0.11 | 13.60 | 0.00  | 0.01              | 0.00             | 99.93  | 0.613               | 0.494            | 0.019                           |
| 00122204          | olivine |            | 41.37            | 0.01             | 0.00                           | 0.02                           | 8.97               | 0.14 | 0.34 | 49.62 | 0.01  | 0.00              | 0.00             | 100.47 | 0.908               |                  |                                 |
| Wadi Subakh       | opx     |            | 56.90            | 0.02             | 2.45                           | 0.61                           | 5.78               | 0.10 | 0.08 | 33.27 | 1.46  | 0.00              | 0.00             | 100.67 | 0.911               |                  |                                 |
| 0419.42 / 2715.11 | cpx     |            | 53.76            | 0.04             | 2.54                           | 0.79                           | 2.26               | 0.07 | 0.05 | 17.47 | 23.69 | 0.02              | 0.00             | 100.68 | 0.932               |                  |                                 |
|                   | spinel  |            | 0.02             | 0.04             | 31.18                          | 37.20                          | 16.89              | 0.22 | 0.13 | 14.60 | 0.01  | 0.01              | 0.00             | 100.30 | 0.644               | 0.445            | 0.014                           |
| 00122205          | olivine |            | 41.73            | 0.00             | 0.00                           | 0.01                           | 8.66               | 0.14 | 0.36 | 50.32 | 0.00  | 0.02              | 0.00             | 101.24 | 0.912               |                  |                                 |
| Wadi Subakh       | opx     |            | 58.66            | 0.02             | 1.00                           | 0.29                           | 5.80               | 0.14 | 0.06 | 34.86 | 0.61  | 0.01              | 0.00             | 101.46 | 0.915               |                  |                                 |
| 0419.89 / 2714.05 | cpx     |            | –                | –                | –                              | –                              | –                  | –    | –    | –     | –     | –                 | –                | –      | –                   |                  |                                 |
|                   | spinel  |            | 0.04             | 0.08             | 16.04                          | 51.53                          | 21.65              | 0.29 | 0.07 | 10.62 | 0.00  | 0.01              | 0.00             | 100.34 | 0.510               | 0.683            | 0.022                           |

**Appendix 1. Continued**

| Reference No.     | Locality    | Mineral | Mode (wt%) | SiO <sub>2</sub> | TiO <sub>2</sub> | Al <sub>2</sub> O <sub>3</sub> | Cr <sub>2</sub> O <sub>3</sub> | FeO <sup>T b</sup> | MnO  | NiO  | MgO   | CaO   | Na <sub>2</sub> O | K <sub>2</sub> O | Total  | Mg# <sup>c, d</sup> | Cr# <sup>d</sup> | Fe <sup>3+</sup> # <sup>d</sup> |
|-------------------|-------------|---------|------------|------------------|------------------|--------------------------------|--------------------------------|--------------------|------|------|-------|-------|-------------------|------------------|--------|---------------------|------------------|---------------------------------|
| 00122206          | Wadi Subakh | olivine | 67.52      | 41.39            | 0.01             | 0.00                           | 0.03                           | 8.48               | 0.11 | 0.39 | 50.66 | 0.02  | 0.00              | 0.00             | 101.08 | 0.914               |                  |                                 |
| 0419.63 / 2713.89 |             | opx     | 26.02      | 57.01            | 0.01             | 2.53                           | 0.68                           | 5.60               | 0.09 | 0.08 | 33.88 | 1.12  | 0.01              | 0.00             | 101.01 | 0.915               |                  |                                 |
|                   |             | cpx     | 3.81       | 54.15            | 0.07             | 2.37                           | 0.73                           | 2.04               | 0.08 | 0.04 | 17.52 | 24.15 | 0.05              | 0.01             | 101.20 | 0.939               |                  |                                 |
|                   |             | spinel  | 0.85       | 0.01             | 0.06             | 32.06                          | 36.49                          | 16.91              | 0.21 | 0.13 | 15.04 | 0.01  | 0.01              | 0.00             | 100.94 | 0.656               | 0.433            | 0.016                           |
| 00122207          | Wadi Subakh | olivine |            | 41.53            | 0.00             | 0.00                           | 0.00                           | 8.38               | 0.12 | 0.38 | 50.72 | 0.01  | 0.00              | 0.00             | 101.14 | 0.915               |                  |                                 |
| 0425.05 / 2711.16 |             | opx     |            | 57.11            | 0.01             | 1.00                           | 0.40                           | 5.49               | 0.13 | 0.09 | 34.63 | 0.61  | 0.00              | 0.00             | 99.46  | 0.918               |                  |                                 |
|                   |             | cpx     |            | 53.60            | 0.04             | 1.18                           | 0.62                           | 2.06               | 0.07 | 0.06 | 18.16 | 23.66 | 0.03              | 0.01             | 99.49  | 0.940               |                  |                                 |
|                   |             | spinel  |            | 0.04             | 0.12             | 15.55                          | 52.19                          | 20.00              | 0.28 | 0.07 | 11.42 | 0.01  | 0.02              | 0.00             | 99.69  | 0.549               | 0.692            | 0.020                           |
| 00122208          | Wadi Subakh | olivine | 64.38      | 40.64            | 0.01             | 0.00                           | 0.02                           | 8.89               | 0.13 | 0.40 | 50.07 | 0.02  | 0.00              | 0.00             | 100.19 | 0.909               |                  |                                 |
| 0424.63 / 2711.79 |             | opx     | 27.35      | 55.88            | 0.03             | 3.04                           | 0.80                           | 5.72               | 0.11 | 0.09 | 33.56 | 0.91  | 0.00              | 0.00             | 100.14 | 0.913               |                  |                                 |
|                   |             | cpx     | 7.16       | 52.34            | 0.10             | 2.95                           | 0.86                           | 2.07               | 0.04 | 0.04 | 16.92 | 24.33 | 0.03              | 0.00             | 99.67  | 0.936               |                  |                                 |
|                   |             | spinel  | 0.70       | 0.02             | 0.07             | 33.83                          | 33.79                          | 16.69              | 0.19 | 0.15 | 15.56 | 0.01  | 0.01              | 0.00             | 100.31 | 0.674               | 0.401            | 0.018                           |
| 00122602          | Wadi Rajmi  | olivine |            | 41.37            | 0.01             | 0.01                           | 0.01                           | 8.53               | 0.09 | 0.36 | 49.97 | 0.02  | 0.00              | 0.00             | 100.37 | 0.913               |                  |                                 |
| 0421.47 / 2723.26 |             | opx     |            | 57.66            | 0.01             | 1.70                           | 0.57                           | 5.33               | 0.13 | 0.09 | 33.34 | 2.09  | 0.01              | 0.00             | 100.93 | 0.918               |                  |                                 |
|                   |             | cpx     |            | 54.63            | 0.04             | 2.08                           | 0.92                           | 1.90               | 0.06 | 0.04 | 18.09 | 22.84 | 0.09              | 0.00             | 100.68 | 0.944               |                  |                                 |
|                   |             | spinel  |            | 0.00             | 0.09             | 21.42                          | 45.75                          | 20.41              | 0.25 | 0.08 | 12.25 | 0.02  | 0.00              | 0.00             | 100.28 | 0.570               | 0.589            | 0.024                           |
| 00122603          | Wadi Rajmi  | olivine | 74.35      | 41.31            | 0.02             | 0.00                           | 0.02                           | 8.82               | 0.12 | 0.38 | 50.57 | 0.02  | 0.00              | 0.00             | 101.26 | 0.911               |                  |                                 |
| 0420.79 / 2722.89 |             | opx     | 21.99      | 58.26            | 0.01             | 1.40                           | 0.49                           | 5.58               | 0.10 | 0.06 | 34.11 | 1.46  | 0.00              | 0.00             | 101.47 | 0.916               |                  |                                 |
|                   |             | cpx     | 1.25       | 55.23            | 0.03             | 1.33                           | 0.66                           | 1.73               | 0.07 | 0.03 | 17.86 | 24.28 | 0.12              | 0.00             | 101.34 | 0.948               |                  |                                 |
|                   |             | spinel  | 0.69       | 0.02             | 0.03             | 19.31                          | 49.60                          | 19.50              | 0.28 | 0.08 | 11.83 | 0.01  | 0.00              | 0.00             | 100.67 | 0.556               | 0.633            | 0.016                           |
| 00122604          | Wadi Rajmi  | olivine |            | 41.80            | 0.01             | 0.00                           | 0.01                           | 8.77               | 0.12 | 0.39 | 50.89 | 0.02  | 0.00              | 0.00             | 102.00 | 0.912               |                  |                                 |
| 0421.47 / 2722.89 |             | opx     |            | 56.90            | 0.02             | 2.29                           | 0.68                           | 5.80               | 0.11 | 0.11 | 34.33 | 0.87  | 0.00              | 0.00             | 101.11 | 0.913               |                  |                                 |
|                   |             | cpx     |            | 53.43            | 0.04             | 2.64                           | 1.07                           | 1.87               | 0.04 | 0.05 | 17.20 | 24.55 | 0.04              | 0.00             | 100.93 | 0.943               |                  |                                 |
|                   |             | spinel  |            | 0.02             | 0.03             | 28.11                          | 40.03                          | 19.58              | 0.24 | 0.08 | 13.67 | 0.00  | 0.00              | 0.00             | 101.76 | 0.606               | 0.489            | 0.021                           |
| 00122605          | Wadi Rajmi  | olivine |            | 40.96            | 0.02             | 0.00                           | 0.02                           | 8.74               | 0.12 | 0.39 | 50.44 | 0.01  | 0.00              | 0.00             | 100.72 | 0.911               |                  |                                 |
| 0421.95 / 2722.95 |             | opx     |            | 57.17            | 0.00             | 2.20                           | 0.59                           | 5.60               | 0.12 | 0.09 | 34.23 | 1.00  | 0.00              | 0.00             | 101.00 | 0.916               |                  |                                 |
|                   |             | cpx     |            | 54.20            | 0.03             | 2.73                           | 0.98                           | 2.05               | 0.06 | 0.05 | 17.85 | 23.87 | 0.04              | 0.00             | 101.87 | 0.939               |                  |                                 |
|                   |             | spinel  |            | 0.02             | 0.03             | 28.19                          | 40.46                          | 17.78              | 0.25 | 0.09 | 14.18 | 0.00  | 0.00              | 0.00             | 101.02 | 0.631               | 0.491            | 0.017                           |
| 00122606          | Wadi Rajmi  | olivine |            | 41.75            | 0.00             | 0.01                           | 0.01                           | 8.47               | 0.10 | 0.37 | 51.52 | 0.01  | 0.01              | 0.00             | 102.25 | 0.916               |                  |                                 |
| 0421.16 / 2721.00 |             | opx     |            | 57.25            | 0.03             | 2.17                           | 0.65                           | 5.02               | 0.11 | 0.04 | 33.21 | 3.04  | 0.01              | 0.00             | 101.52 | 0.922               |                  |                                 |
|                   |             | cpx     |            | —                | —                | —                              | —                              | —                  | —    | —    | —     | —     | —                 | —                | —      | —                   |                  |                                 |
|                   |             | spinel  |            | 0.03             | 0.03             | 24.82                          | 42.92                          | 19.20              | 0.25 | 0.13 | 13.52 | 0.01  | 0.01              | 0.00             | 100.92 | 0.613               | 0.537            | 0.023                           |
| 00122607          | Wadi Rajmi  | olivine | 66.14      | 41.79            | 0.01             | 0.00                           | 0.02                           | 8.40               | 0.10 | 0.41 | 51.11 | 0.01  | 0.00              | 0.00             | 101.85 | 0.916               |                  |                                 |
| 0420.89 / 2720.37 |             | opx     | 28.02      | 56.35            | 0.02             | 2.49                           | 0.75                           | 5.71               | 0.11 | 0.09 | 34.39 | 0.58  | 0.00              | 0.00             | 100.49 | 0.915               |                  |                                 |
|                   |             | cpx     | 3.19       | 54.05            | 0.05             | 2.65                           | 0.90                           | 1.95               | 0.06 | 0.08 | 17.36 | 24.43 | 0.06              | 0.00             | 101.59 | 0.941               |                  |                                 |
|                   |             | spinel  | 0.61       | 0.02             | 0.06             | 31.07                          | 37.60                          | 17.85              | 0.20 | 0.16 | 14.81 | 0.00  | 0.00              | 0.00             | 101.77 | 0.645               | 0.448            | 0.018                           |

**Appendix 1. Continued**

| Reference No.     | Mineral | Mode (wt%) | SiO <sub>2</sub> | TiO <sub>2</sub> | Al <sub>2</sub> O <sub>3</sub> | Cr <sub>2</sub> O <sub>3</sub> | FeO <sup>T b</sup> | MnO  | NiO  | MgO   | CaO   | Na <sub>2</sub> O | K <sub>2</sub> O | Total  | Mg# <sup>c, d</sup> | Cr# <sup>d</sup> | Fe <sup>3+</sup> # <sup>d</sup> |
|-------------------|---------|------------|------------------|------------------|--------------------------------|--------------------------------|--------------------|------|------|-------|-------|-------------------|------------------|--------|---------------------|------------------|---------------------------------|
| 00122609          | olivine |            | 41.27            | 0.01             | 0.13                           | 0.00                           | 8.51               | 0.12 | 0.39 | 51.15 | 0.01  | 0.00              | 0.00             | 101.59 | 0.915               |                  |                                 |
| Wadi Rajmi        | opx     |            | 57.47            | 0.02             | 1.96                           | 0.61                           | 5.54               | 0.13 | 0.12 | 34.43 | 1.06  | 0.01              | 0.00             | 101.35 | 0.917               |                  |                                 |
| 0420.95 / 2721.47 | cpx     |            | —                | —                | —                              | —                              | —                  | —    | —    | —     | —     | —                 | —                | —      |                     |                  |                                 |
|                   | spinel  |            | 0.03             | 0.03             | 24.95                          | 43.09                          | 19.84              | 0.28 | 0.14 | 13.30 | 0.01  | 0.01              | 0.00             | 101.68 | 0.601               | 0.537            | 0.024                           |
| 00122610          | olivine |            | 41.88            | 0.00             | 0.00                           | 0.01                           | 8.61               | 0.11 | 0.39 | 51.46 | 0.01  | 0.00              | 0.00             | 102.48 | 0.914               |                  |                                 |
| Wadi Rajmi        | opx     |            | 57.51            | 0.01             | 1.82                           | 0.56                           | 5.68               | 0.10 | 0.12 | 34.45 | 1.50  | 0.00              | 0.00             | 101.74 | 0.915               |                  |                                 |
| 0421.21 / 2721.84 | cpx     |            | 54.80            | 0.02             | 1.72                           | 0.72                           | 1.79               | 0.05 | 0.02 | 17.86 | 24.83 | 0.08              | 0.01             | 101.91 | 0.947               |                  |                                 |
|                   | spinel  |            | 0.03             | 0.02             | 25.02                          | 42.88                          | 19.91              | 0.28 | 0.17 | 13.21 | 0.01  | 0.01              | 0.00             | 101.54 | 0.598               | 0.535            | 0.024                           |
| 00122801          | olivine |            | 42.05            | 0.02             | 0.01                           | 0.01                           | 9.52               | 0.13 | 0.37 | 50.11 | 0.05  | 0.00              | 0.00             | 102.27 | 0.904               |                  |                                 |
| Wadi Zabin        | opx     |            | 56.50            | 0.08             | 1.72                           | 0.61                           | 6.33               | 0.13 | 0.07 | 33.69 | 1.22  | 0.01              | 0.00             | 100.36 | 0.905               |                  |                                 |
| 0415.26 / 2726.11 | cpx     |            | —                | —                | —                              | —                              | —                  | —    | —    | —     | —     | —                 | —                | —      |                     |                  |                                 |
|                   | spinel  |            | 0.07             | 0.21             | 22.53                          | 43.78                          | 22.02              | 0.24 | 0.10 | 11.90 | 0.01  | 0.01              | 0.00             | 100.86 | 0.547               | 0.566            | 0.027                           |
| 00122802          | olivine | 74.96      | 41.14            | 0.01             | 0.00                           | 0.01                           | 8.73               | 0.09 | 0.38 | 50.14 | 0.03  | 0.00              | 0.00             | 100.53 | 0.911               |                  |                                 |
| Wadi Zabin        | opx     | 22.18      | 56.10            | 0.02             | 1.73                           | 0.57                           | 5.71               | 0.12 | 0.07 | 34.29 | 0.75  | 0.00              | 0.00             | 99.36  | 0.915               |                  |                                 |
| 0415.37 / 2725.42 | cpx     | 1.91       | 52.54            | 0.04             | 2.08                           | 0.88                           | 2.22               | 0.06 | 0.10 | 17.58 | 23.79 | 0.09              | 0.00             | 99.38  | 0.934               |                  |                                 |
|                   | spinel  | 0.67       | 0.03             | 0.03             | 22.69                          | 44.23                          | 20.51              | 0.22 | 0.08 | 12.72 | 0.00  | 0.00              | 0.00             | 100.53 | 0.585               | 0.567            | 0.026                           |
| 00122803          | olivine |            | 41.25            | 0.01             | 0.01                           | 0.02                           | 8.34               | 0.11 | 0.38 | 51.25 | 0.02  | 0.00              | 0.00             | 101.39 | 0.916               |                  |                                 |
| Wadi Zabin        | opx     |            | 56.79            | 0.01             | 1.96                           | 0.70                           | 5.67               | 0.16 | 0.04 | 34.27 | 0.93  | 0.00              | 0.00             | 100.52 | 0.915               |                  |                                 |
| 0415.74 / 2724.89 | cpx     |            | 54.73            | 0.07             | 1.91                           | 0.73                           | 2.04               | 0.10 | 0.06 | 17.87 | 24.02 | 0.15              | 0.00             | 101.68 | 0.940               |                  |                                 |
|                   | spinel  |            | 0.03             | 0.05             | 26.35                          | 40.82                          | 19.01              | 0.23 | 0.08 | 13.74 | 0.01  | 0.00              | 0.00             | 100.32 | 0.620               | 0.510            | 0.023                           |
| 00122804          | olivine |            | 41.47            | 0.01             | 0.00                           | 0.03                           | 9.01               | 0.11 | 0.41 | 50.30 | 0.02  | 0.00              | 0.00             | 101.35 | 0.909               |                  |                                 |
| Wadi Zabin        | opx     |            | 56.93            | 0.01             | 1.74                           | 0.62                           | 5.81               | 0.13 | 0.09 | 34.44 | 1.11  | 0.00              | 0.00             | 100.89 | 0.913               |                  |                                 |
| 0416.11 / 2724.68 | cpx     |            | 53.78            | 0.01             | 2.36                           | 1.03                           | 2.40               | 0.09 | 0.05 | 18.14 | 23.11 | 0.04              | 0.00             | 101.03 | 0.931               |                  |                                 |
|                   | spinel  |            | 0.04             | 0.03             | 22.71                          | 44.50                          | 20.41              | 0.27 | 0.06 | 12.38 | 0.01  | 0.00              | 0.00             | 100.40 | 0.572               | 0.568            | 0.023                           |
| 00122805          | olivine |            | 40.59            | 0.00             | 0.00                           | 0.01                           | 8.57               | 0.13 | 0.39 | 50.04 | 0.01  | 0.00              | 0.00             | 99.75  | 0.912               |                  |                                 |
| Wadi Zabin        | opx     |            | 56.87            | 0.01             | 1.91                           | 0.60                           | 5.70               | 0.14 | 0.09 | 34.53 | 1.10  | 0.00              | 0.00             | 100.95 | 0.915               |                  |                                 |
| 0417.05 / 2724.53 | cpx     |            | —                | —                | —                              | —                              | —                  | —    | —    | —     | —     | —                 | —                | —      |                     |                  |                                 |
|                   | spinel  |            | 0.03             | 0.07             | 24.63                          | 43.84                          | 20.23              | 0.23 | 0.07 | 12.30 | 0.01  | 0.00              | 0.00             | 101.40 | 0.558               | 0.544            | 0.017                           |
| 00122806          | olivine |            | 41.86            | 0.01             | 0.02                           | 0.46                           | 8.75               | 0.12 | 0.37 | 50.78 | 0.00  | 0.00              | 0.00             | 102.37 | 0.912               |                  |                                 |
| Wadi Zabin        | opx     |            | 57.18            | 0.02             | 1.49                           | 0.46                           | 6.27               | 0.11 | 0.06 | 34.43 | 0.62  | 0.01              | 0.00             | 100.64 | 0.907               |                  |                                 |
| 0417.42 / 2724.42 | cpx     |            | —                | —                | —                              | —                              | —                  | —    | —    | —     | —     | —                 | —                | —      |                     |                  |                                 |
|                   | spinel  |            | 0.02             | 0.04             | 24.63                          | 42.16                          | 22.24              | 0.26 | 0.06 | 11.35 | 0.01  | 0.01              | 0.00             | 100.77 | 0.522               | 0.535            | 0.022                           |
| 00123001          | olivine |            | 41.70            | 0.02             | 0.00                           | 0.01                           | 8.69               | 0.10 | 0.34 | 50.11 | 0.02  | 0.00              | 0.00             | 100.98 | 0.911               |                  |                                 |
| Wadi Zabin        | opx     |            | 57.20            | 0.01             | 1.78                           | 0.62                           | 5.66               | 0.11 | 0.08 | 34.35 | 1.49  | 0.00              | 0.00             | 101.30 | 0.915               |                  |                                 |
| 0416.05 / 2724.26 | cpx     |            | —                | —                | —                              | —                              | —                  | —    | —    | —     | —     | —                 | —                | —      |                     |                  |                                 |
|                   | spinel  |            | 0.02             | 0.03             | 23.30                          | 44.74                          | 19.97              | 0.25 | 0.09 | 12.41 | 0.01  | 0.02              | 0.00             | 100.85 | 0.570               | 0.563            | 0.019                           |

**Appendix 1. Continued**

| Reference No.     | Mineral | Mode (wt%) | SiO <sub>2</sub> | TiO <sub>2</sub> | Al <sub>2</sub> O <sub>3</sub> | Cr <sub>2</sub> O <sub>3</sub> | FeO <sup>Tb</sup> | MnO  | NiO  | MgO   | CaO   | Na <sub>2</sub> O | K <sub>2</sub> O | Total  | Mg# <sup>c, d</sup> | Cr# <sup>d</sup> | Fe <sup>3+</sup> # <sup>d</sup> |
|-------------------|---------|------------|------------------|------------------|--------------------------------|--------------------------------|-------------------|------|------|-------|-------|-------------------|------------------|--------|---------------------|------------------|---------------------------------|
| 00123002          | olivine | 68.58      | 41.82            | 0.01             | 0.00                           | 0.02                           | 8.98              | 0.09 | 0.33 | 50.43 | 0.02  | 0.00              | 0.00             | 101.71 | 0.909               |                  |                                 |
| Wadi Zabin        | opx     | 25.50      | 57.03            | 0.03             | 1.57                           | 0.55                           | 5.99              | 0.11 | 0.08 | 34.49 | 1.06  | 0.01              | 0.00             | 100.93 | 0.911               |                  |                                 |
| 0415.63 / 2723.63 | cpx     | 3.17       | 53.41            | 0.01             | 2.11                           | 1.04                           | 2.03              | 0.07 | 0.03 | 17.34 | 23.94 | 0.15              | 0.00             | 100.14 | 0.938               |                  |                                 |
|                   | spinel  | 0.76       | 0.02             | 0.08             | 20.84                          | 46.59                          | 20.82             | 0.26 | 0.13 | 11.91 | 0.00  | 0.01              | 0.00             | 100.67 | 0.555               | 0.600            | 0.023                           |
| 00123003          | olivine |            | 41.62            | 0.00             | 0.00                           | 0.00                           | 8.82              | 0.11 | 0.41 | 51.23 | 0.01  | 0.01              | 0.00             | 102.20 | 0.912               |                  |                                 |
| Wadi Zabin        | opx     |            | 57.82            | 0.01             | 1.26                           | 0.47                           | 5.86              | 0.14 | 0.11 | 35.25 | 0.83  | 0.00              | 0.00             | 101.75 | 0.915               |                  |                                 |
| 0416.53 / 2723.11 | cpx     |            | –                | –                | –                              | –                              | –                 | –    | –    | –     | –     | –                 | –                | –      |                     |                  |                                 |
|                   | spinel  |            | 0.01             | 0.08             | 17.24                          | 49.28                          | 23.91             | 0.33 | 0.09 | 10.37 | 0.01  | 0.01              | 0.00             | 101.33 | 0.494               | 0.657            | 0.031                           |
| 00123004          | olivine | 73.28      | 41.19            | 0.01             | 0.00                           | 0.01                           | 8.66              | 0.13 | 0.37 | 49.97 | 0.03  | 0.00              | 0.00             | 100.37 | 0.911               |                  |                                 |
| Wadi Zabin        | opx     | 23.93      | 57.96            | 0.01             | 1.03                           | 0.37                           | 5.87              | 0.11 | 0.09 | 35.06 | 1.01  | 0.01              | 0.00             | 101.52 | 0.914               |                  |                                 |
| 0416.05 / 2722.53 | cpx     | 1.13       | 54.97            | 0.02             | 1.07                           | 0.69                           | 1.89              | 0.03 | 0.02 | 18.43 | 24.22 | 0.10              | 0.00             | 101.45 | 0.946               |                  |                                 |
|                   | spinel  | 0.74       | 0.03             | 0.05             | 14.58                          | 53.06                          | 22.80             | 0.31 | 0.04 | 10.15 | 0.00  | 0.01              | 0.00             | 101.01 | 0.490               | 0.709            | 0.025                           |
| 00123005          | olivine |            | 41.15            | 0.01             | 0.00                           | 0.02                           | 9.03              | 0.11 | 0.36 | 49.98 | 0.03  | 0.00              | 0.00             | 100.68 | 0.908               |                  |                                 |
| Wadi Zabin        | opx     |            | 57.68            | 0.01             | 1.14                           | 0.48                           | 5.80              | 0.10 | 0.12 | 35.08 | 0.77  | 0.00              | 0.00             | 101.17 | 0.915               |                  |                                 |
| 0416.16 / 2721.74 | cpx     |            | 53.83            | 0.01             | 1.44                           | 0.87                           | 2.03              | 0.06 | 0.08 | 18.18 | 23.45 | 0.15              | 0.00             | 100.13 | 0.941               |                  |                                 |
|                   | spinel  |            | 0.02             | 0.06             | 16.02                          | 51.30                          | 22.62             | 0.28 | 0.05 | 10.65 | 0.01  | 0.01              | 0.00             | 101.00 | 0.509               | 0.682            | 0.026                           |
| 00123006          | olivine | 73.15      | 41.80            | 0.01             | 0.00                           | 0.00                           | 8.61              | 0.10 | 0.41 | 50.59 | 0.01  | 0.00              | 0.00             | 101.54 | 0.913               |                  |                                 |
| Wadi Zabin        | opx     | 22.73      | 57.88            | 0.02             | 1.10                           | 0.42                           | 5.90              | 0.12 | 0.08 | 35.13 | 1.09  | 0.00              | 0.00             | 101.75 | 0.914               |                  |                                 |
| 0416.58 / 2721.05 | cpx     | 1.50       | 54.83            | 0.02             | 1.24                           | 0.63                           | 1.91              | 0.06 | 0.04 | 18.58 | 23.98 | 0.03              | 0.01             | 101.33 | 0.945               |                  |                                 |
|                   | spinel  | 0.84       | 0.04             | 0.04             | 15.38                          | 52.71                          | 22.29             | 0.28 | 0.08 | 10.69 | 0.00  | 0.00              | 0.00             | 101.51 | 0.510               | 0.697            | 0.024                           |
| 00123007          | olivine |            | 42.14            | 0.01             | 0.00                           | 0.03                           | 8.77              | 0.14 | 0.39 | 51.36 | 0.01  | 0.00              | 0.00             | 102.87 | 0.913               |                  |                                 |
| Wadi Zabin        | opx     |            | 58.11            | 0.02             | 0.88                           | 0.43                           | 5.73              | 0.12 | 0.06 | 35.13 | 1.00  | 0.00              | 0.00             | 101.46 | 0.916               |                  |                                 |
| 0416.95 / 2720.37 | cpx     |            | –                | –                | –                              | –                              | –                 | –    | –    | –     | –     | –                 | –                | –      |                     |                  |                                 |
|                   | spinel  |            | 0.07             | 0.02             | 11.96                          | 53.77                          | 25.60             | 0.34 | 0.05 | 9.50  | 0.00  | 0.00              | 0.00             | 101.31 | 0.465               | 0.751            | 0.039                           |
| 00123008          | olivine |            | 41.84            | 0.00             | 0.00                           | 0.02                           | 8.90              | 0.11 | 0.36 | 50.55 | 0.02  | 0.00              | 0.00             | 101.81 | 0.910               |                  |                                 |
| Wadi Zabin        | opx     |            | 57.05            | 0.01             | 1.42                           | 0.57                           | 5.26              | 0.11 | 0.07 | 31.98 | 4.86  | 0.01              | 0.00             | 101.35 | 0.917               |                  |                                 |
| 0419.79 / 2717.00 | cpx     |            | 54.68            | 0.03             | 1.77                           | 0.83                           | 2.11              | 0.11 | 0.03 | 17.89 | 24.44 | 0.05              | 0.00             | 101.93 | 0.938               |                  |                                 |
|                   | spinel  |            | 0.04             | 0.04             | 17.70                          | 49.01                          | 22.41             | 0.26 | 0.08 | 11.14 | 0.01  | 0.00              | 0.00             | 100.68 | 0.528               | 0.650            | 0.029                           |
| 00123009          | olivine | 66.42      | 41.35            | 0.00             | 0.00                           | 0.00                           | 8.68              | 0.11 | 0.40 | 50.84 | 0.02  | 0.00              | 0.00             | 101.41 | 0.913               |                  |                                 |
| Wadi Zabin        | opx     | 29.54      | 57.43            | 0.03             | 1.11                           | 0.57                           | 5.73              | 0.13 | 0.08 | 34.83 | 1.28  | 0.01              | 0.00             | 101.21 | 0.915               |                  |                                 |
| 0417.79 / 2719.11 | cpx     | 1.47       | 54.28            | 0.02             | 1.24                           | 0.64                           | 2.19              | 0.08 | 0.04 | 18.30 | 23.56 | 0.08              | 0.00             | 100.42 | 0.937               |                  |                                 |
|                   | spinel  | 0.67       | 0.03             | 0.04             | 14.97                          | 52.49                          | 22.86             | 0.33 | 0.05 | 10.43 | 0.00  | 0.00              | 0.00             | 101.22 | 0.501               | 0.702            | 0.027                           |
| 00123010          | olivine |            | 42.05            | 0.01             | 0.00                           | 0.01                           | 8.74              | 0.13 | 0.34 | 50.68 | 0.02  | 0.00              | 0.00             | 102.00 | 0.912               |                  |                                 |
| Wadi Zabin        | opx     |            | 57.51            | 0.01             | 1.31                           | 0.43                           | 5.90              | 0.12 | 0.08 | 34.98 | 0.93  | 0.00              | 0.00             | 101.27 | 0.914               |                  |                                 |
| 0416.68 / 2718.63 | cpx     |            | 55.08            | 0.00             | 1.31                           | 0.57                           | 1.85              | 0.05 | 0.04 | 17.97 | 24.53 | 0.05              | 0.00             | 101.46 | 0.945               |                  |                                 |
|                   | spinel  |            | 0.03             | 0.03             | 18.73                          | 49.22                          | 21.31             | 0.28 | 0.07 | 11.18 | 0.00  | 0.01              | 0.00             | 100.86 | 0.527               | 0.638            | 0.021                           |

**Appendix 1. Continued**

| Reference No.     | Locality   | Mineral                     | Mode (wt%) | SiO <sub>2</sub> | TiO <sub>2</sub> | Al <sub>2</sub> O <sub>3</sub> | Cr <sub>2</sub> O <sub>3</sub> | FeO <sup>T b</sup> | MnO  | NiO  | MgO   | CaO   | Na <sub>2</sub> O | K <sub>2</sub> O | Total  | Mg# <sup>c, d</sup> | Cr# <sup>d</sup> | Fe <sup>3+</sup> # <sup>d</sup> |
|-------------------|------------|-----------------------------|------------|------------------|------------------|--------------------------------|--------------------------------|--------------------|------|------|-------|-------|-------------------|------------------|--------|---------------------|------------------|---------------------------------|
|                   |            | UTM coordinate <sup>a</sup> |            |                  |                  |                                |                                |                    |      |      |       |       |                   |                  |        |                     |                  |                                 |
| 00123101          | Wadi Zabin | olivine                     |            | 41.71            | 0.01             | 0.00                           | 0.01                           | 8.24               | 0.13 | 0.38 | 51.01 | 0.02  | 0.01              | 0.00             | 101.51 | 0.917               |                  |                                 |
|                   |            | opx                         |            | 58.04            | 0.03             | 1.27                           | 0.50                           | 5.51               | 0.10 | 0.06 | 34.88 | 1.08  | 0.01              | 0.00             | 101.47 | 0.919               |                  |                                 |
| 0417.37 / 2720.37 |            | cpx                         |            | 54.99            | 0.04             | 1.65                           | 0.79                           | 2.00               | 0.10 | 0.03 | 21.11 | 19.78 | 0.12              | 0.00             | 100.61 | 0.949               |                  |                                 |
|                   |            | spinel                      |            | 0.07             | 0.05             | 18.33                          | 50.47                          | 21.03              | 0.28 | 0.05 | 11.59 | 0.01  | 0.00              | 0.00             | 101.87 | 0.540               | 0.649            | 0.021                           |
| 00123102          | Wadi Zabin | olivine                     |            | 39.15            | 0.01             | 1.79                           | 1.56                           | 9.35               | 0.13 | 0.35 | 48.66 | 0.01  | 0.00              | 0.00             | 101.01 | 0.901               |                  |                                 |
|                   |            | opx                         |            | 57.16            | 0.03             | 1.69                           | 0.55                           | 5.53               | 0.14 | 0.08 | 34.78 | 0.84  | 0.00              | 0.00             | 100.81 | 0.918               |                  |                                 |
| 0417.58 / 2719.68 |            | cpx                         |            | 54.22            | 0.01             | 1.69                           | 0.84                           | 1.69               | 0.07 | 0.04 | 17.77 | 25.01 | 0.07              | 0.00             | 101.42 | 0.949               |                  |                                 |
|                   |            | spinel                      |            | 0.03             | 0.02             | 21.18                          | 46.99                          | 21.15              | 0.24 | 0.07 | 12.23 | 0.01  | 0.00              | 0.00             | 101.93 | 0.562               | 0.598            | 0.025                           |
| 00123103          | Wadi Zabin | olivine                     |            | 41.53            | 0.00             | 0.00                           | 0.00                           | 8.76               | 0.11 | 0.33 | 50.72 | 0.02  | 0.00              | 0.00             | 101.47 | 0.912               |                  |                                 |
|                   |            | opx                         |            | 57.65            | 0.03             | 1.27                           | 0.44                           | 5.78               | 0.11 | 0.08 | 35.15 | 0.69  | 0.00              | 0.00             | 101.20 | 0.916               |                  |                                 |
| 0417.89 / 2719.16 |            | cpx                         |            | —                | —                | —                              | —                              | —                  | —    | —    | —     | —     | —                 | —                | —      | —                   |                  |                                 |
|                   |            | spinel                      |            | 0.02             | 0.04             | 18.53                          | 50.10                          | 21.15              | 0.24 | 0.07 | 11.50 | 0.00  | 0.00              | 0.00             | 101.64 | 0.537               | 0.645            | 0.021                           |
| 00123104          | Wadi Zabin | olivine                     | 78.50      | 41.62            | 0.00             | 0.00                           | 0.01                           | 8.48               | 0.12 | 0.40 | 50.84 | 0.01  | 0.00              | 0.00             | 101.48 | 0.914               |                  |                                 |
|                   |            | opx                         | 18.72      | 57.65            | 0.02             | 1.38                           | 0.47                           | 5.34               | 0.12 | 0.10 | 34.40 | 1.79  | 0.00              | 0.00             | 101.28 | 0.920               |                  |                                 |
| 0417.95 / 2718.42 |            | cpx                         | 0.62       | 54.33            | 0.03             | 1.49                           | 0.83                           | 1.62               | 0.04 | 0.02 | 17.89 | 24.83 | 0.11              | 0.00             | 101.15 | 0.952               |                  |                                 |
|                   |            | spinel                      | 0.99       | 0.04             | 0.05             | 18.65                          | 49.99                          | 20.36              | 0.28 | 0.07 | 11.96 | 0.01  | 0.01              | 0.00             | 101.41 | 0.559               | 0.643            | 0.021                           |
| 00123105          | Wadi Zabin | olivine                     |            | 41.23            | 0.00             | 0.00                           | 0.02                           | 8.74               | 0.11 | 0.38 | 50.16 | 0.01  | 0.00              | 0.00             | 100.66 | 0.911               |                  |                                 |
|                   |            | opx                         |            | 55.75            | 0.02             | 1.67                           | 0.65                           | 5.74               | 0.13 | 0.09 | 34.50 | 1.37  | 0.01              | 0.00             | 99.93  | 0.915               |                  |                                 |
| 0417.95 / 2718.42 |            | cpx                         |            | —                | —                | —                              | —                              | —                  | —    | —    | —     | —     | —                 | —                | —      | —                   |                  |                                 |
|                   |            | spinel                      |            | 0.04             | 0.08             | 21.58                          | 47.46                          | 19.99              | 0.26 | 0.08 | 12.63 | 0.00  | 0.01              | 0.00             | 102.11 | 0.576               | 0.596            | 0.020                           |
| 01010201          | Wadi Zabin | olivine                     |            | 41.65            | 0.01             | 0.02                           | 0.00                           | 8.51               | 0.08 | 0.34 | 50.42 | 0.02  | 0.00              | 0.00             | 101.05 | 0.913               |                  |                                 |
|                   |            | opx                         |            | 58.27            | 0.01             | 1.45                           | 0.49                           | 5.51               | 0.11 | 0.07 | 34.93 | 0.76  | 0.01              | 0.00             | 101.61 | 0.919               |                  |                                 |
| 0418.74 / 2719.84 |            | cpx                         |            | 55.02            | 0.03             | 1.61                           | 0.66                           | 1.88               | 0.06 | 0.09 | 17.79 | 24.46 | 0.06              | 0.00             | 101.67 | 0.944               |                  |                                 |
|                   |            | spinel                      |            | 0.03             | 0.04             | 19.44                          | 48.28                          | 21.18              | 0.25 | 0.08 | 11.78 | 0.00  | 0.02              | 0.00             | 101.11 | 0.551               | 0.625            | 0.024                           |
| 01010202          | Wadi Zabin | olivine                     |            | 41.81            | 0.00             | 0.00                           | 0.03                           | 8.32               | 0.10 | 0.34 | 50.70 | 0.02  | 0.00              | 0.00             | 101.31 | 0.916               |                  |                                 |
|                   |            | opx                         |            | 57.11            | 0.01             | 1.99                           | 0.59                           | 5.73               | 0.13 | 0.09 | 34.51 | 0.82  | 0.00              | 0.00             | 100.97 | 0.915               |                  |                                 |
| 0418.63 / 2719.00 |            | cpx                         |            | 53.85            | 0.05             | 2.24                           | 0.90                           | 1.91               | 0.09 | 0.06 | 17.48 | 24.40 | 0.02              | 0.00             | 101.00 | 0.942               |                  |                                 |
|                   |            | spinel                      |            | 0.09             | 0.05             | 24.21                          | 42.23                          | 20.14              | 0.24 | 0.11 | 13.00 | 0.00  | 0.01              | 0.00             | 100.07 | 0.595               | 0.539            | 0.026                           |
| 01010301          | Wadi Zabin | olivine                     | 72.57      | 42.18            | 0.00             | 0.00                           | 0.01                           | 8.94               | 0.13 | 0.38 | 50.99 | 0.02  | 0.00              | 0.00             | 102.67 | 0.910               |                  |                                 |
|                   |            | opx                         | 22.02      | 57.45            | 0.00             | 1.08                           | 0.43                           | 5.58               | 0.10 | 0.07 | 34.69 | 1.45  | 0.00              | 0.00             | 100.85 | 0.917               |                  |                                 |
| 0419.58 / 2717.63 |            | cpx                         | 2.16       | 54.58            | 0.00             | 1.29                           | 0.73                           | 1.84               | 0.03 | 0.05 | 17.86 | 24.59 | 0.09              | 0.01             | 101.08 | 0.945               |                  |                                 |
|                   |            | spinel                      | 0.77       | 0.03             | 0.05             | 15.27                          | 51.96                          | 23.50              | 0.30 | 0.03 | 10.57 | 0.00  | 0.00              | 0.00             | 101.71 | 0.504               | 0.695            | 0.031                           |
| 01010302          | Wadi Zabin | olivine                     |            | 41.72            | 0.01             | 0.00                           | 0.01                           | 8.59               | 0.11 | 0.38 | 50.75 | 0.01  | 0.00              | 0.00             | 101.58 | 0.913               |                  |                                 |
|                   |            | opx                         |            | 57.44            | 0.03             | 1.69                           | 0.49                           | 5.70               | 0.13 | 0.07 | 35.02 | 0.71  | 0.00              | 0.00             | 101.28 | 0.916               |                  |                                 |
| 0419.63 / 2716.89 |            | cpx                         |            | 53.83            | 0.02             | 1.94                           | 0.88                           | 2.00               | 0.07 | 0.04 | 17.67 | 24.30 | 0.05              | 0.00             | 100.81 | 0.940               |                  |                                 |
|                   |            | spinel                      |            | 0.02             | 0.06             | 21.79                          | 46.72                          | 19.96              | 0.26 | 0.10 | 12.63 | 0.01  | 0.00              | 0.00             | 101.54 | 0.579               | 0.590            | 0.021                           |

**Appendix 1. Continued**

| Reference No.     | Mineral | Mode (wt%) | SiO <sub>2</sub> | TiO <sub>2</sub> | Al <sub>2</sub> O <sub>3</sub> | Cr <sub>2</sub> O <sub>3</sub> | FeO <sup>T b</sup> | MnO  | NiO  | MgO   | CaO   | Na <sub>2</sub> O | K <sub>2</sub> O | Total  | Mg# <sup>c, d</sup> | Cr# <sup>d</sup> | Fe <sup>3+</sup> # <sup>d</sup> |
|-------------------|---------|------------|------------------|------------------|--------------------------------|--------------------------------|--------------------|------|------|-------|-------|-------------------|------------------|--------|---------------------|------------------|---------------------------------|
| 01010303          | olivine | 75.43      | 41.47            | 0.02             | 0.01                           | 0.01                           | 8.60               | 0.10 | 0.39 | 50.48 | 0.01  | 0.00              | 0.00             | 101.10 | 0.913               |                  |                                 |
| Wadi Zabin        | opx     | 21.20      | 57.43            | 0.01             | 1.41                           | 0.52                           | 5.62               | 0.12 | 0.09 | 34.67 | 1.16  | 0.01              | 0.00             | 101.02 | 0.917               |                  |                                 |
| 0419.16 / 2717.79 | cpx     | 1.56       | 54.27            | 0.03             | 1.70                           | 0.89                           | 1.83               | 0.07 | 0.06 | 17.73 | 23.99 | 0.13              | 0.00             | 100.70 | 0.945               |                  |                                 |
|                   | spinel  | 0.70       | 0.01             | 0.05             | 19.80                          | 48.70                          | 19.72              | 0.23 | 0.10 | 12.11 | 0.00  | 0.01              | 0.00             | 100.72 | 0.566               | 0.623            | 0.019                           |
| 01010304          | olivine |            | 41.91            | 0.01             | 0.00                           | 0.03                           | 8.16               | 0.11 | 0.36 | 51.36 | 0.01  | 0.00              | 0.00             | 101.95 | 0.918               |                  |                                 |
| Wadi Zabin        | opx     |            | 58.53            | 0.01             | 0.64                           | 0.27                           | 5.34               | 0.13 | 0.07 | 35.54 | 0.64  | 0.01              | 0.00             | 101.16 | 0.922               |                  |                                 |
| 0418.68 / 2717.16 | cpx     |            | —                | —                | —                              | —                              | —                  | —    | —    | —     | —     | —                 | —                | —      |                     |                  |                                 |
|                   | spinel  |            | 0.02             | 0.05             | 12.60                          | 57.15                          | 20.19              | 0.30 | 0.07 | 10.68 | 0.02  | 0.01              | 0.00             | 101.09 | 0.518               | 0.753            | 0.015                           |
| 01010305          | olivine |            | 41.62            | 0.01             | 0.00                           | 0.02                           | 8.70               | 0.09 | 0.36 | 50.20 | 0.01  | 0.00              | 0.00             | 101.01 | 0.911               |                  |                                 |
| Wadi Zabin        | opx     |            | 57.60            | 0.02             | 1.21                           | 0.40                           | 5.67               | 0.11 | 0.07 | 34.32 | 0.86  | 0.01              | 0.00             | 100.26 | 0.915               |                  |                                 |
| 0418.68 / 2717.16 | cpx     |            | 54.43            | 0.03             | 1.33                           | 0.62                           | 1.87               | 0.04 | 0.02 | 17.60 | 23.96 | 0.13              | 0.00             | 100.03 | 0.944               |                  |                                 |
|                   | spinel  |            | 0.03             | 0.07             | 18.81                          | 48.82                          | 20.22              | 0.27 | 0.05 | 11.52 | 0.00  | 0.01              | 0.00             | 99.80  | 0.546               | 0.635            | 0.019                           |
| 01010306          | olivine |            | 41.15            | 0.00             | 0.01                           | 0.03                           | 8.38               | 0.11 | 0.38 | 49.98 | 0.03  | 0.00              | 0.00             | 100.06 | 0.914               |                  |                                 |
| Wadi Zabin        | opx     |            | 56.96            | 0.03             | 2.02                           | 0.63                           | 5.45               | 0.12 | 0.06 | 33.22 | 1.92  | 0.00              | 0.00             | 100.41 | 0.916               |                  |                                 |
| 0420.21 / 2718.26 | cpx     |            | —                | —                | —                              | —                              | —                  | —    | —    | —     | —     | —                 | —                | —      |                     |                  |                                 |
|                   | spinel  |            | 0.07             | 0.04             | 14.85                          | 52.72                          | 22.45              | 0.27 | 0.08 | 10.42 | 0.00  | 0.00              | 0.00             | 100.89 | 0.501               | 0.704            | 0.025                           |
| 01010307          | olivine |            | 41.63            | 0.01             | 0.00                           | 0.02                           | 8.42               | 0.10 | 0.34 | 50.59 | 0.02  | 0.00              | 0.00             | 101.12 | 0.915               |                  |                                 |
| Wadi Zabin        | opx     |            | 57.64            | 0.01             | 1.59                           | 0.55                           | 5.29               | 0.09 | 0.07 | 33.92 | 1.77  | 0.00              | 0.00             | 100.93 | 0.920               |                  |                                 |
| 0420.63 / 2717.84 | cpx     |            | —                | —                | —                              | —                              | —                  | —    | —    | —     | —     | —                 | —                | —      |                     |                  |                                 |
|                   | spinel  |            | 0.03             | 0.03             | 20.37                          | 47.41                          | 19.26              | 0.24 | 0.11 | 12.65 | 0.01  | 0.01              | 0.00             | 100.12 | 0.591               | 0.610            | 0.022                           |
| 01010308          | olivine |            | 41.52            | 0.01             | 0.00                           | 0.01                           | 8.87               | 0.11 | 0.40 | 49.97 | 0.02  | 0.00              | 0.00             | 100.92 | 0.909               |                  |                                 |
| Wadi Zabin        | opx     |            | 57.26            | 0.01             | 1.43                           | 0.55                           | 5.90               | 0.12 | 0.09 | 33.75 | 1.39  | 0.00              | 0.00             | 100.49 | 0.911               |                  |                                 |
| 0420.53 / 2718.63 | cpx     |            | 53.66            | 0.02             | 1.57                           | 0.77                           | 1.87               | 0.06 | 0.03 | 17.51 | 24.13 | 0.04              | 0.00             | 99.68  | 0.943               |                  |                                 |
|                   | spinel  |            | 0.02             | 0.03             | 18.28                          | 48.98                          | 21.20              | 0.27 | 0.08 | 11.42 | 0.01  | 0.01              | 0.00             | 100.30 | 0.542               | 0.642            | 0.024                           |
| 01010309          | olivine |            | 40.45            | 0.02             | 0.01                           | 0.02                           | 8.56               | 0.10 | 0.38 | 49.67 | 0.02  | 0.00              | 0.00             | 99.22  | 0.912               |                  |                                 |
| Wadi Zabin        | opx     |            | 57.51            | 0.02             | 1.15                           | 0.47                           | 5.65               | 0.11 | 0.09 | 33.98 | 1.12  | 0.00              | 0.00             | 100.09 | 0.915               |                  |                                 |
| 0420.05 / 2719.63 | cpx     |            | 54.20            | 0.01             | 1.35                           | 0.75                           | 1.91               | 0.05 | 0.08 | 17.62 | 23.56 | 0.16              | 0.00             | 99.69  | 0.943               |                  |                                 |
|                   | spinel  |            | 0.04             | 0.03             | 16.25                          | 50.21                          | 22.24              | 0.25 | 0.07 | 10.85 | 0.01  | 0.00              | 0.00             | 99.95  | 0.522               | 0.675            | 0.028                           |
| 01010701          | olivine |            | —                | —                | —                              | —                              | —                  | —    | —    | —     | —     | —                 | —                | —      |                     |                  |                                 |
| Wadi Subakh       | opx     |            | 56.55            | 0.04             | 2.07                           | 0.73                           | 5.57               | 0.12 | 0.11 | 32.98 | 2.88  | 0.00              | 0.00             | 101.04 | 0.914               |                  |                                 |
| 0423.42 / 2717.32 | cpx     |            | 53.19            | 0.03             | 2.15                           | 0.80                           | 2.10               | 0.08 | 0.04 | 17.43 | 24.25 | 0.02              | 0.00             | 100.11 | 0.937               |                  |                                 |
|                   | spinel  |            | 0.02             | 0.06             | 25.26                          | 42.77                          | 19.49              | 0.23 | 0.07 | 13.19 | 0.00  | 0.00              | 0.00             | 101.09 | 0.596               | 0.532            | 0.021                           |
| 01010702          | olivine |            | —                | —                | —                              | —                              | —                  | —    | —    | —     | —     | —                 | —                | —      |                     |                  |                                 |
| Wadi Subakh       | opx     |            | 57.49            | 0.03             | 1.92                           | 0.43                           | 7.19               | 0.15 | 0.13 | 33.53 | 0.76  | 0.00              | 0.00             | 101.61 | 0.893               |                  |                                 |
| 0422.89 / 2717.21 | cpx     |            | 54.47            | 0.09             | 2.05                           | 0.56                           | 2.39               | 0.08 | 0.03 | 17.39 | 24.58 | 0.02              | 0.00             | 101.65 | 0.928               |                  |                                 |
|                   | spinel  |            | 0.02             | 0.13             | 28.81                          | 36.94                          | 22.48              | 0.23 | 0.13 | 12.37 | 0.01  | 0.01              | 0.00             | 101.12 | 0.554               | 0.464            | 0.027                           |



**Appendix 1. Continued**

| Reference No.               | Mineral | Mode (wt%) | SiO <sub>2</sub> | TiO <sub>2</sub> | Al <sub>2</sub> O <sub>3</sub> | Cr <sub>2</sub> O <sub>3</sub> | FeO <sup>T b</sup> | MnO  | NiO  | MgO   | CaO   | Na <sub>2</sub> O | K <sub>2</sub> O | Total  | Mg# <sup>c, d</sup> | Cr# <sup>d</sup> | Fe <sup>3+</sup> # <sup>d</sup> |
|-----------------------------|---------|------------|------------------|------------------|--------------------------------|--------------------------------|--------------------|------|------|-------|-------|-------------------|------------------|--------|---------------------|------------------|---------------------------------|
| UTM coordinate <sup>a</sup> |         |            |                  |                  |                                |                                |                    |      |      |       |       |                   |                  |        |                     |                  |                                 |
| 01010703                    | olivine |            | 41.89            | 0.01             | 0.00                           | 0.01                           | 8.71               | 0.13 | 0.42 | 50.72 | 0.01  | 0.00              | 0.00             | 101.90 | 0.912               |                  |                                 |
| Wadi Subakh                 | opx     |            | 57.19            | 0.01             | 1.76                           | 0.53                           | 5.72               | 0.13 | 0.06 | 34.59 | 0.75  | 0.01              | 0.00             | 100.75 | 0.915               |                  |                                 |
| 0422.89 / 2717.21           | cpx     |            | —                | —                | —                              | —                              | —                  | —    | —    | —     | —     | —                 | —                | —      |                     |                  |                                 |
|                             | spinel  |            | 0.04             | 0.06             | 22.33                          | 44.87                          | 20.26              | 0.25 | 0.11 | 12.69 | 0.00  | 0.00              | 0.00             | 100.61 | 0.585               | 0.574            | 0.025                           |
| 01010704                    | olivine |            | 42.02            | 0.01             | 0.00                           | 0.04                           | 8.06               | 0.11 | 0.38 | 51.34 | 0.01  | 0.00              | 0.00             | 101.98 | 0.919               |                  |                                 |
| Wadi Subakh                 | opx     |            | 57.83            | 0.02             | 1.70                           | 0.53                           | 5.65               | 0.15 | 0.08 | 34.96 | 0.65  | 0.00              | 0.00             | 101.58 | 0.917               |                  |                                 |
| 0423.89 / 2715.63           | cpx     |            | —                | —                | —                              | —                              | —                  | —    | —    | —     | —     | —                 | —                | —      |                     |                  |                                 |
|                             | spinel  |            | 0.03             | 0.10             | 23.10                          | 45.53                          | 18.69              | 0.27 | 0.12 | 13.15 | 0.01  | 0.02              | 0.00             | 101.01 | 0.601               | 0.569            | 0.018                           |
| 01010801                    | olivine |            | 41.47            | 0.02             | 0.00                           | 0.01                           | 8.61               | 0.11 | 0.36 | 50.36 | 0.02  | 0.00              | 0.00             | 100.96 | 0.912               |                  |                                 |
| Wadi Subakh                 | opx     |            | 57.62            | 0.01             | 1.97                           | 0.54                           | 5.68               | 0.10 | 0.05 | 34.33 | 1.08  | 0.00              | 0.00             | 101.39 | 0.915               |                  |                                 |
| 0425.53 / 2718.05           | cpx     |            | 54.27            | 0.05             | 2.19                           | 0.80                           | 2.03               | 0.06 | 0.03 | 17.64 | 23.96 | 0.06              | 0.00             | 101.08 | 0.939               |                  |                                 |
|                             | spinel  |            | 0.02             | 0.06             | 27.66                          | 40.32                          | 18.44              | 0.21 | 0.06 | 13.71 | 0.01  | 0.01              | 0.00             | 100.50 | 0.614               | 0.494            | 0.018                           |
| 01010802                    | olivine |            | 42.02            | 0.01             | 0.00                           | 0.01                           | 8.41               | 0.12 | 0.36 | 51.18 | 0.01  | 0.00              | 0.00             | 102.11 | 0.916               |                  |                                 |
| Wadi Subakh                 | opx     |            | 57.38            | 0.03             | 1.90                           | 0.64                           | 5.57               | 0.14 | 0.09 | 34.91 | 0.63  | 0.00              | 0.00             | 101.28 | 0.918               |                  |                                 |
| 0425.42 / 2719.16           | cpx     |            | —                | —                | —                              | —                              | —                  | —    | —    | —     | —     | —                 | —                | —      |                     |                  |                                 |
|                             | spinel  |            | 0.02             | 0.08             | 26.19                          | 42.31                          | 18.76              | 0.24 | 0.09 | 13.51 | 0.01  | 0.01              | 0.00             | 101.20 | 0.606               | 0.520            | 0.018                           |
| 01010803                    | olivine |            | 41.54            | 0.01             | 0.00                           | 0.01                           | 8.87               | 0.09 | 0.39 | 50.11 | 0.01  | 0.00              | 0.00             | 101.04 | 0.910               |                  |                                 |
| Wadi Subakh                 | opx     |            | 57.69            | 0.03             | 1.76                           | 0.56                           | 6.07               | 0.10 | 0.09 | 34.34 | 0.69  | 0.00              | 0.00             | 101.33 | 0.910               |                  |                                 |
| 0425.42 / 2719.16           | cpx     |            | 54.95            | 0.05             | 1.73                           | 0.64                           | 2.31               | 0.05 | 0.04 | 18.09 | 23.34 | 0.08              | 0.00             | 101.29 | 0.933               |                  |                                 |
|                             | spinel  |            | 0.02             | 0.09             | 24.09                          | 43.77                          | 20.27              | 0.23 | 0.06 | 12.46 | 0.00  | 0.00              | 0.00             | 101.00 | 0.568               | 0.549            | 0.020                           |
| 01010804                    | olivine |            | 41.27            | 0.00             | 0.00                           | 0.03                           | 8.69               | 0.13 | 0.34 | 50.47 | 0.02  | 0.00              | 0.00             | 100.97 | 0.912               |                  |                                 |
| Wadi Subakh                 | opx     |            | 56.73            | 0.03             | 1.95                           | 0.63                           | 5.67               | 0.10 | 0.08 | 34.38 | 0.69  | 0.00              | 0.00             | 100.26 | 0.915               |                  |                                 |
| 0426.16 / 2719.95           | cpx     |            | 53.41            | 0.06             | 2.14                           | 0.88                           | 1.96               | 0.08 | 0.06 | 17.51 | 23.93 | 0.09              | 0.00             | 100.14 | 0.941               |                  |                                 |
|                             | spinel  |            | 0.13             | 0.06             | 25.11                          | 43.15                          | 18.18              | 0.26 | 0.08 | 13.21 | 0.01  | 0.00              | 0.00             | 100.20 | 0.600               | 0.535            | 0.014                           |
| 01010805                    | olivine |            | 40.75            | 0.02             | 0.00                           | 0.00                           | 8.62               | 0.12 | 0.39 | 50.53 | 0.03  | 0.00              | 0.00             | 100.44 | 0.913               |                  |                                 |
| Wadi Subakh                 | opx     |            | 57.27            | 0.02             | 1.64                           | 0.53                           | 5.54               | 0.13 | 0.10 | 35.09 | 0.75  | 0.01              | 0.00             | 101.08 | 0.919               |                  |                                 |
| 0426.16 / 2716.37           | cpx     |            | 53.48            | 0.03             | 1.85                           | 0.83                           | 1.93               | 0.06 | 0.10 | 17.85 | 23.92 | 0.13              | 0.00             | 100.17 | 0.943               |                  |                                 |
|                             | spinel  |            | 0.12             | 0.06             | 21.95                          | 47.07                          | 18.85              | 0.24 | 0.07 | 12.67 | 0.01  | 0.00              | 0.00             | 101.05 | 0.580               | 0.590            | 0.015                           |
| 04122401                    | olivine |            | 41.55            | 0.00             | 0.02                           | 0.02                           | 9.25               | 0.12 | 0.37 | 49.95 | 0.02  | 0.00              | 0.00             | 101.31 | 0.906               |                  |                                 |
| Wadi Zabin                  | opx     |            | 57.34            | 0.03             | 1.81                           | 0.57                           | 6.11               | 0.14 | 0.07 | 34.04 | 1.23  | 0.01              | 0.00             | 101.36 | 0.908               |                  |                                 |
| 0425.6 / 2712.5             | cpx     |            | 53.36            | 0.18             | 2.43                           | 0.94                           | 2.37               | 0.07 | 0.04 | 17.15 | 23.66 | 0.24              | 0.00             | 100.44 | 0.928               |                  |                                 |
|                             | spinel  |            | 0.04             | 0.11             | 22.04                          | 44.32                          | 22.23              | 0.25 | 0.10 | 12.35 | 0.00  | 0.01              | 0.00             | 101.45 | 0.567               | 0.574            | 0.032                           |
| 04122402                    | olivine |            | 41.64            | 0.01             | 0.00                           | 0.01                           | 8.58               | 0.10 | 0.42 | 50.31 | 0.01  | 0.00              | 0.00             | 101.11 | 0.913               |                  |                                 |
| Wadi Zabin                  | opx     |            | 56.89            | 0.03             | 1.92                           | 0.62                           | 5.70               | 0.13 | 0.08 | 33.75 | 1.64  | 0.01              | 0.00             | 100.77 | 0.914               |                  |                                 |
| 0424.9 / 2712.6             | cpx     |            | —                | —                | —                              | —                              | —                  | —    | —    | —     | —     | —                 | —                | —      |                     |                  |                                 |
|                             | spinel  |            | 0.03             | 0.03             | 24.53                          | 41.49                          | 22.07              | 0.25 | 0.11 | 12.32 | 0.01  | 0.01              | 0.00             | 100.84 | 0.564               | 0.532            | 0.030                           |

**Appendix 1. Continued**

| Reference No.   | Mineral | Mode (wt%) | SiO <sub>2</sub> | TiO <sub>2</sub> | Al <sub>2</sub> O <sub>3</sub> | Cr <sub>2</sub> O <sub>3</sub> | FeO <sup>T b</sup> | MnO  | NiO  | MgO   | CaO   | Na <sub>2</sub> O | K <sub>2</sub> O | Total  | Mg# <sup>c, d</sup> | Cr# <sup>d</sup> | Fe <sup>3+</sup> # <sup>d</sup> |
|-----------------|---------|------------|------------------|------------------|--------------------------------|--------------------------------|--------------------|------|------|-------|-------|-------------------|------------------|--------|---------------------|------------------|---------------------------------|
| 04122403        | olivine |            | 41.99            | 0.00             | 0.01                           | 0.02                           | 8.78               | 0.12 | 0.38 | 50.87 | 0.02  | 0.00              | 0.00             | 102.19 | 0.912               |                  |                                 |
| Wadi Zabin      | opx     |            | 57.05            | 0.02             | 2.17                           | 0.70                           | 5.58               | 0.11 | 0.13 | 34.08 | 1.25  | 0.00              | 0.00             | 101.11 | 0.916               |                  |                                 |
| 0424.3 / 2712.4 | cpx     |            | 53.41            | 0.04             | 2.68                           | 1.18                           | 2.04               | 0.06 | 0.04 | 17.15 | 24.52 | 0.10              | 0.00             | 101.23 | 0.938               |                  |                                 |
|                 | spinel  |            | 0.04             | 0.04             | 24.06                          | 43.50                          | 20.20              | 0.22 | 0.09 | 13.27 | 0.00  | 0.00              | 0.00             | 101.42 | 0.601               | 0.548            | 0.026                           |
| 04122404        | olivine |            | 41.80            | 0.01             | 0.01                           | 0.02                           | 8.82               | 0.11 | 0.38 | 50.66 | 0.02  | 0.00              | 0.00             | 101.83 | 0.911               |                  |                                 |
| Wadi Zabin      | opx     |            | 57.06            | 0.02             | 1.84                           | 0.61                           | 5.70               | 0.13 | 0.11 | 34.07 | 1.55  | 0.00              | 0.00             | 101.09 | 0.914               |                  |                                 |
| 0423.6 / 2712.7 | cpx     |            | –                | –                | –                              | –                              | –                  | –    | –    | –     | –     | –                 | –                | –      |                     |                  |                                 |
|                 | spinel  |            | 0.03             | 0.03             | 22.62                          | 43.83                          | 21.51              | 0.25 | 0.10 | 12.75 | 0.00  | 0.00              | 0.00             | 101.14 | 0.585               | 0.565            | 0.032                           |
| 04122405        | olivine |            | 41.20            | 0.00             | 0.00                           | 0.04                           | 8.72               | 0.11 | 0.42 | 49.94 | 0.02  | 0.00              | 0.00             | 100.45 | 0.911               |                  |                                 |
| Wadi Zabin      | opx     |            | 57.57            | 0.02             | 1.79                           | 0.57                           | 6.00               | 0.13 | 0.08 | 34.33 | 0.76  | 0.00              | 0.00             | 101.24 | 0.911               |                  |                                 |
| 0423.2 / 2713.3 | cpx     |            | 54.08            | 0.04             | 2.27                           | 1.04                           | 2.16               | 0.06 | 0.03 | 17.45 | 23.93 | 0.17              | 0.00             | 101.23 | 0.935               |                  |                                 |
|                 | spinel  |            | 0.02             | 0.04             | 20.42                          | 47.00                          | 21.12              | 0.27 | 0.12 | 12.43 | 0.00  | 0.00              | 0.00             | 101.42 | 0.576               | 0.607            | 0.029                           |
| 04122406        | olivine |            | 41.91            | 0.00             | 0.00                           | 0.04                           | 8.97               | 0.12 | 0.44 | 50.97 | 0.01  | 0.00              | 0.00             | 102.46 | 0.910               |                  |                                 |
| Wadi Zabin      | opx     |            | 57.49            | 0.01             | 2.04                           | 0.69                           | 5.93               | 0.14 | 0.09 | 34.38 | 0.79  | 0.01              | 0.00             | 101.56 | 0.912               |                  |                                 |
| 0424.2 / 2712.8 | cpx     |            | 54.39            | 0.03             | 2.35                           | 0.99                           | 2.23               | 0.05 | 0.05 | 18.26 | 23.15 | 0.09              | 0.00             | 101.59 | 0.936               |                  |                                 |
|                 | spinel  |            | 0.02             | 0.03             | 23.42                          | 44.59                          | 21.09              | 0.24 | 0.13 | 12.96 | 0.01  | 0.00              | 0.00             | 102.48 | 0.586               | 0.561            | 0.028                           |
| 04122407        | olivine |            | 41.69            | 0.01             | 0.01                           | 0.01                           | 8.92               | 0.13 | 0.39 | 50.69 | 0.02  | 0.00              | 0.00             | 101.87 | 0.910               |                  |                                 |
| Wadi Zabin      | opx     |            | 57.78            | 0.02             | 1.82                           | 0.68                           | 5.37               | 0.13 | 0.10 | 33.84 | 1.85  | 0.00              | 0.00             | 101.59 | 0.918               |                  |                                 |
| 0423.9 / 2713.2 | cpx     |            | –                | –                | –                              | –                              | –                  | –    | –    | –     | –     | –                 | –                | –      |                     |                  |                                 |
|                 | spinel  |            | 0.03             | 0.04             | 22.18                          | 45.03                          | 21.79              | 0.24 | 0.09 | 12.71 | 0.00  | 0.01              | 0.00             | 102.12 | 0.579               | 0.577            | 0.031                           |
| 04122408        | olivine |            | 41.59            | 0.01             | 0.02                           | 0.01                           | 9.11               | 0.11 | 0.39 | 50.48 | 0.03  | 0.00              | 0.00             | 101.76 | 0.908               |                  |                                 |
| Wadi Zabin      | opx     |            | 57.30            | 0.03             | 1.93                           | 0.55                           | 5.99               | 0.12 | 0.11 | 34.35 | 1.44  | 0.01              | 0.00             | 101.82 | 0.911               |                  |                                 |
| 0424.5 / 2713.2 | cpx     |            | –                | –                | –                              | –                              | –                  | –    | –    | –     | –     | –                 | –                | –      |                     |                  |                                 |
|                 | spinel  |            | 0.04             | 0.05             | 22.26                          | 45.19                          | 21.76              | 0.27 | 0.10 | 12.31 | 0.01  | 0.01              | 0.00             | 101.98 | 0.563               | 0.577            | 0.028                           |
| 04122501        | olivine |            | 42.00            | 0.01             | 0.00                           | 0.01                           | 8.82               | 0.09 | 0.36 | 50.81 | 0.01  | 0.00              | 0.00             | 102.12 | 0.911               |                  |                                 |
| Wadi Zabin      | opx     |            | 57.40            | 0.02             | 1.70                           | 0.61                           | 5.63               | 0.13 | 0.09 | 34.39 | 0.93  | 0.00              | 0.00             | 100.91 | 0.916               |                  |                                 |
| 0422.6 / 2714.4 | cpx     |            | 54.55            | 0.03             | 1.84                           | 0.87                           | 2.02               | 0.08 | 0.03 | 17.61 | 23.96 | 0.27              | 0.01             | 101.25 | 0.940               |                  |                                 |
|                 | spinel  |            | 0.04             | 0.07             | 23.04                          | 45.64                          | 19.56              | 0.22 | 0.08 | 12.85 | 0.01  | 0.00              | 0.00             | 101.51 | 0.585               | 0.571            | 0.019                           |
| 04122502        | olivine |            | 41.90            | 0.01             | 0.01                           | 0.01                           | 8.48               | 0.09 | 0.39 | 50.98 | 0.03  | 0.00              | 0.00             | 101.90 | 0.915               |                  |                                 |
| Wadi Zabin      | opx     |            | 56.92            | 0.02             | 1.88                           | 0.75                           | 5.37               | 0.14 | 0.09 | 34.07 | 1.44  | 0.02              | 0.00             | 100.69 | 0.919               |                  |                                 |
| 0422.0 / 2714.2 | cpx     |            | –                | –                | –                              | –                              | –                  | –    | –    | –     | –     | –                 | –                | –      |                     |                  |                                 |
|                 | spinel  |            | 0.04             | 0.06             | 23.52                          | 44.60                          | 19.82              | 0.22 | 0.08 | 12.83 | 0.01  | 0.01              | 0.00             | 101.18 | 0.584               | 0.560            | 0.021                           |
| 04122503        | olivine |            | 41.61            | 0.01             | 0.00                           | 0.01                           | 9.02               | 0.10 | 0.35 | 50.36 | 0.02  | 0.00              | 0.00             | 101.48 | 0.909               |                  |                                 |
| Wadi Zabin      | opx     |            | 57.67            | 0.02             | 1.93                           | 0.61                           | 5.95               | 0.16 | 0.08 | 34.53 | 0.81  | 0.00              | 0.00             | 101.75 | 0.912               |                  |                                 |
| 0422.2 / 2713.6 | cpx     |            | 54.56            | 0.02             | 2.15                           | 0.87                           | 2.33               | 0.08 | 0.03 | 18.15 | 23.02 | 0.16              | 0.00             | 101.37 | 0.933               |                  |                                 |
|                 | spinel  |            | 0.06             | 0.02             | 25.36                          | 41.16                          | 21.78              | 0.22 | 0.11 | 12.51 | 0.01  | 0.00              | 0.00             | 101.23 | 0.567               | 0.521            | 0.028                           |

**Appendix 1. Continued**

| Reference No.   | Mineral | Mode (wt%) | SiO <sub>2</sub> | TiO <sub>2</sub> | Al <sub>2</sub> O <sub>3</sub> | Cr <sub>2</sub> O <sub>3</sub> | FeO <sup>T b</sup> | MnO  | NiO  | MgO   | CaO   | Na <sub>2</sub> O | K <sub>2</sub> O | Total  | Mg# <sup>c, d</sup> | Cr# <sup>d</sup> | Fe <sup>3+</sup> # <sup>d</sup> |
|-----------------|---------|------------|------------------|------------------|--------------------------------|--------------------------------|--------------------|------|------|-------|-------|-------------------|------------------|--------|---------------------|------------------|---------------------------------|
| 04122504        | olivine |            | 41.70            | 0.00             | 0.00                           | 0.01                           | 8.93               | 0.12 | 0.40 | 50.53 | 0.02  | 0.00              | 0.00             | 101.71 | 0.910               |                  |                                 |
| Wadi Zabin      | opx     |            | 57.28            | 0.02             | 2.00                           | 0.65                           | 5.51               | 0.08 | 0.13 | 34.39 | 1.06  | 0.00              | 0.00             | 101.12 | 0.918               |                  |                                 |
| 0422.5 / 2714.6 | cpx     |            | 54.50            | 0.04             | 1.95                           | 0.67                           | 1.92               | 0.06 | 0.04 | 17.67 | 24.20 | 0.01              | 0.00             | 101.06 | 0.942               |                  |                                 |
|                 | spinel  |            | 0.06             | 0.05             | 24.17                          | 43.27                          | 20.91              | 0.22 | 0.11 | 13.02 | 0.01  | 0.00              | 0.00             | 101.83 | 0.588               | 0.546            | 0.027                           |
| 04122505        | olivine |            | 41.59            | 0.01             | 0.01                           | 0.00                           | 8.62               | 0.10 | 0.39 | 50.79 | 0.02  | 0.00              | 0.00             | 101.54 | 0.913               |                  |                                 |
| Wadi Zabin      | opx     |            | 58.06            | 0.03             | 1.55                           | 0.56                           | 5.71               | 0.15 | 0.07 | 34.22 | 0.86  | 0.01              | 0.00             | 101.22 | 0.914               |                  |                                 |
| 0422.7 / 2715.1 | cpx     |            | —                | —                | —                              | —                              | —                  | —    | —    | —     | —     | —                 | —                | —      | —                   |                  |                                 |
|                 | spinel  |            | 0.06             | 0.03             | 20.61                          | 46.19                          | 21.92              | 0.25 | 0.08 | 11.47 | 0.00  | 0.01              | 0.00             | 100.63 | 0.536               | 0.601            | 0.026                           |
| 04122506        | olivine |            | 40.36            | 0.01             | 0.00                           | 0.02                           | 8.66               | 0.12 | 0.41 | 49.36 | 0.01  | 0.00              | 0.00             | 98.94  | 0.910               |                  |                                 |
| Wadi Zabin      | opx     |            | 58.13            | 0.02             | 1.56                           | 0.49                           | 5.78               | 0.09 | 0.10 | 34.07 | 1.08  | 0.00              | 0.00             | 101.33 | 0.913               |                  |                                 |
| 0423.2 / 2714.9 | cpx     |            | —                | —                | —                              | —                              | —                  | —    | —    | —     | —     | —                 | —                | —      | —                   |                  |                                 |
|                 | spinel  |            | 0.02             | 0.05             | 20.89                          | 44.79                          | 23.53              | 0.27 | 0.08 | 10.86 | 0.01  | 0.00              | 0.00             | 100.51 | 0.510               | 0.590            | 0.030                           |
| 04122601        | olivine |            | 41.87            | 0.00             | 0.00                           | 0.03                           | 8.77               | 0.11 | 0.40 | 51.31 | 0.03  | 0.00              | 0.00             | 102.51 | 0.912               |                  |                                 |
| Wadi Zabin      | opx     |            | 58.57            | 0.01             | 1.15                           | 0.50                           | 5.83               | 0.09 | 0.10 | 34.62 | 0.81  | 0.01              | 0.00             | 101.70 | 0.914               |                  |                                 |
| 0424.5 / 2714.9 | cpx     |            | —                | —                | —                              | —                              | —                  | —    | —    | —     | —     | —                 | —                | —      | —                   |                  |                                 |
|                 | spinel  |            | 0.03             | 0.04             | 15.40                          | 50.75                          | 23.77              | 0.32 | 0.08 | 10.63 | 0.01  | 0.00              | 0.00             | 101.03 | 0.511               | 0.689            | 0.035                           |
| 04122602        | olivine |            | 41.87            | 0.01             | 0.00                           | 0.01                           | 8.59               | 0.10 | 0.34 | 51.65 | 0.01  | 0.00              | 0.00             | 102.59 | 0.915               |                  |                                 |
| Wadi Zabin      | opx     |            | 57.44            | 0.01             | 1.88                           | 0.65                           | 5.67               | 0.11 | 0.07 | 34.97 | 0.71  | 0.00              | 0.00             | 101.51 | 0.917               |                  |                                 |
| 0424.1 / 2714.6 | cpx     |            | 54.38            | 0.04             | 2.10                           | 0.84                           | 2.16               | 0.06 | 0.04 | 17.80 | 23.94 | 0.17              | 0.00             | 101.53 | 0.936               |                  |                                 |
|                 | spinel  |            | 0.01             | 0.04             | 23.42                          | 43.77                          | 21.26              | 0.25 | 0.12 | 12.79 | 0.00  | 0.01              | 0.00             | 101.66 | 0.583               | 0.556            | 0.029                           |
| 04122603        | olivine |            | 41.75            | 0.01             | 0.01                           | 0.01                           | 9.04               | 0.12 | 0.39 | 50.79 | 0.03  | 0.01              | 0.00             | 102.15 | 0.909               |                  |                                 |
| Wadi Zabin      | opx     |            | 57.95            | 0.01             | 1.85                           | 0.69                           | 5.84               | 0.12 | 0.08 | 34.05 | 0.80  | 0.00              | 0.00             | 101.39 | 0.912               |                  |                                 |
| 0423.9 / 2714.1 | cpx     |            | —                | —                | —                              | —                              | —                  | —    | —    | —     | —     | —                 | —                | —      | —                   |                  |                                 |
|                 | spinel  |            | 0.02             | 0.04             | 21.18                          | 45.00                          | 22.18              | 0.24 | 0.10 | 12.11 | 0.01  | 0.02              | 0.00             | 100.90 | 0.562               | 0.588            | 0.032                           |
| 04122604        | olivine |            | 41.02            | 0.02             | 0.00                           | 0.02                           | 8.90               | 0.16 | 0.38 | 50.10 | 0.03  | 0.00              | 0.00             | 100.63 | 0.909               |                  |                                 |
| Wadi Zabin      | opx     |            | 58.02            | 0.02             | 1.62                           | 0.58                           | 5.92               | 0.12 | 0.08 | 34.25 | 0.79  | 0.01              | 0.00             | 101.42 | 0.912               |                  |                                 |
| 0425.1 / 2714.8 | cpx     |            | 54.38            | 0.03             | 2.01                           | 0.91                           | 2.40               | 0.06 | 0.04 | 17.49 | 23.36 | 0.26              | 0.00             | 100.94 | 0.929               |                  |                                 |
|                 | spinel  |            | 0.03             | 0.02             | 19.82                          | 46.25                          | 23.68              | 0.26 | 0.07 | 11.11 | 0.00  | 0.00              | 0.00             | 101.24 | 0.520               | 0.610            | 0.033                           |
| 04122605        | olivine |            | 41.68            | 0.01             | 0.00                           | 0.01                           | 9.20               | 0.12 | 0.38 | 50.32 | 0.02  | 0.00              | 0.00             | 101.73 | 0.907               |                  |                                 |
| Wadi Zabin      | opx     |            | —                | —                | —                              | —                              | —                  | —    | —    | —     | —     | —                 | —                | —      | —                   |                  |                                 |
| 0425.0 / 2714.4 | cpx     |            | —                | —                | —                              | —                              | —                  | —    | —    | —     | —     | —                 | —                | —      | —                   |                  |                                 |
|                 | spinel  |            | 0.02             | 0.03             | 22.26                          | 43.05                          | 23.80              | 0.28 | 0.11 | 11.79 | 0.00  | 0.00              | 0.00             | 101.36 | 0.545               | 0.565            | 0.038                           |
| 04122606        | olivine |            | 41.78            | 0.00             | 0.01                           | 0.02                           | 9.20               | 0.10 | 0.41 | 50.98 | 0.01  | 0.00              | 0.00             | 102.51 | 0.908               |                  |                                 |
| Wadi Zabin      | opx     |            | 58.04            | 0.01             | 1.89                           | 0.68                           | 5.57               | 0.15 | 0.07 | 34.24 | 0.69  | 0.01              | 0.00             | 101.34 | 0.916               |                  |                                 |
| 0425.0 / 2713.6 | cpx     |            | 54.26            | 0.03             | 2.13                           | 0.86                           | 2.23               | 0.07 | 0.05 | 17.69 | 24.20 | 0.11              | 0.00             | 101.64 | 0.934               |                  |                                 |
|                 | spinel  |            | 0.02             | 0.04             | 22.93                          | 43.00                          | 23.27              | 0.24 | 0.13 | 12.13 | 0.01  | 0.00              | 0.00             | 101.78 | 0.555               | 0.557            | 0.036                           |

**Appendix 1. Continued**

| Reference No.               | Mineral | Mode (wt%) | SiO <sub>2</sub> | TiO <sub>2</sub> | Al <sub>2</sub> O <sub>3</sub> | Cr <sub>2</sub> O <sub>3</sub> | FeO <sup>T b</sup> | MnO  | NiO  | MgO   | CaO   | Na <sub>2</sub> O | K <sub>2</sub> O | Total  | Mg# <sup>c, d</sup> | Cr# <sup>d</sup> | Fe <sup>3+</sup> # <sup>d</sup> |
|-----------------------------|---------|------------|------------------|------------------|--------------------------------|--------------------------------|--------------------|------|------|-------|-------|-------------------|------------------|--------|---------------------|------------------|---------------------------------|
| UTM coordinate <sup>a</sup> |         |            |                  |                  |                                |                                |                    |      |      |       |       |                   |                  |        |                     |                  |                                 |
| 04123001                    | olivine |            | 41.73            | 0.00             | 0.00                           | 0.00                           | 8.71               | 0.11 | 0.34 | 50.76 | 0.01  | 0.00              | 0.00             | 101.68 | 0.912               |                  |                                 |
| Wadi Rajmi                  | opx     |            | 57.54            | 0.01             | 1.54                           | 0.55                           | 5.59               | 0.14 | 0.08 | 34.75 | 0.81  | 0.00              | 0.00             | 101.02 | 0.917               |                  |                                 |
| 0421.44 / 2721.33           | cpx     |            | —                | —                | —                              | —                              | —                  | —    | —    | —     | —     | —                 | —                | —      | —                   |                  |                                 |
|                             | spinel  |            | 0.05             | 0.05             | 20.83                          | 47.84                          | 19.81              | 0.26 | 0.06 | 12.06 | 0.02  | 0.01              | 0.00             | 100.97 | 0.559               | 0.606            | 0.017                           |
| 04123004                    | olivine |            | 41.78            | 0.00             | 0.00                           | 0.05                           | 8.50               | 0.13 | 0.34 | 51.05 | 0.02  | 0.00              | 0.00             | 101.87 | 0.915               |                  |                                 |
| Wadi Rajmi                  | opx     |            | —                | —                | —                              | —                              | —                  | —    | —    | —     | —     | —                 | —                | —      | —                   |                  |                                 |
| 0421.41 / 2721.26           | cpx     |            | —                | —                | —                              | —                              | —                  | —    | —    | —     | —     | —                 | —                | —      | —                   |                  |                                 |
|                             | spinel  |            | 0.05             | 0.17             | 13.85                          | 53.05                          | 23.42              | 0.30 | 0.04 | 10.37 | 0.01  | 0.00              | 0.00             | 101.26 | 0.499               | 0.720            | 0.030                           |
| 04123005                    | olivine |            | 41.92            | 0.00             | 0.00                           | 0.01                           | 8.50               | 0.10 | 0.37 | 50.70 | 0.02  | 0.00              | 0.00             | 101.62 | 0.914               |                  |                                 |
| Wadi Rajmi                  | opx     |            | 57.96            | 0.01             | 1.52                           | 0.61                           | 5.58               | 0.12 | 0.06 | 34.86 | 0.79  | 0.01              | 0.00             | 101.53 | 0.918               |                  |                                 |
| 0421.14 / 2721.18           | cpx     |            | —                | —                | —                              | —                              | —                  | —    | —    | —     | —     | —                 | —                | —      | —                   |                  |                                 |
|                             | spinel  |            | 0.04             | 0.07             | 18.42                          | 49.86                          | 20.01              | 0.26 | 0.08 | 11.96 | 0.01  | 0.01              | 0.00             | 100.71 | 0.562               | 0.645            | 0.020                           |
| 04123006                    | olivine |            | 41.87            | 0.01             | 0.00                           | 0.02                           | 7.81               | 0.09 | 0.34 | 51.49 | 0.02  | 0.00              | 0.00             | 101.65 | 0.922               |                  |                                 |
| Wadi Rajmi                  | opx     |            | —                | —                | —                              | —                              | —                  | —    | —    | —     | —     | —                 | —                | —      | —                   |                  |                                 |
| 0421.14 / 2721.18           | cpx     |            | —                | —                | —                              | —                              | —                  | —    | —    | —     | —     | —                 | —                | —      | —                   |                  |                                 |
|                             | spinel  |            | 0.05             | 0.23             | 11.90                          | 55.81                          | 21.53              | 0.34 | 0.05 | 11.00 | 0.00  | 0.02              | 0.00             | 100.93 | 0.532               | 0.759            | 0.027                           |
| 04123007                    | olivine |            | 41.73            | 0.00             | 0.02                           | 0.04                           | 8.30               | 0.10 | 0.40 | 50.69 | 0.01  | 0.00              | 0.00             | 101.29 | 0.916               |                  |                                 |
| Wadi Rajmi                  | opx     |            | 57.42            | 0.02             | 2.01                           | 0.67                           | 5.58               | 0.13 | 0.09 | 34.84 | 0.53  | 0.00              | 0.00             | 101.28 | 0.918               |                  |                                 |
| 0421.14 / 2721.18           | cpx     |            | 53.75            | 0.05             | 2.30                           | 0.98                           | 1.73               | 0.07 | 0.06 | 17.55 | 23.13 | 0.09              | 0.00             | 99.71  | 0.948               |                  |                                 |
|                             | spinel  |            | 0.05             | 0.07             | 23.42                          | 44.78                          | 19.47              | 0.24 | 0.06 | 12.98 | 0.00  | 0.00              | 0.00             | 101.08 | 0.591               | 0.562            | 0.020                           |
| 04123008                    | olivine |            | 42.26            | 0.01             | 0.00                           | 0.00                           | 8.02               | 0.11 | 0.31 | 51.45 | 0.04  | 0.00              | 0.00             | 102.19 | 0.920               |                  |                                 |
| Wadi Rajmi                  | opx     |            | —                | —                | —                              | —                              | —                  | —    | —    | —     | —     | —                 | —                | —      | —                   |                  |                                 |
| 0421.14 / 2721.18           | cpx     |            | —                | —                | —                              | —                              | —                  | —    | —    | —     | —     | —                 | —                | —      | —                   |                  |                                 |
|                             | spinel  |            | 0.03             | 0.15             | 12.22                          | 51.54                          | 24.26              | 0.34 | 0.05 | 10.70 | 0.02  | 0.00              | 0.00             | 99.33  | 0.530               | 0.745            | 0.048                           |
| 04123009                    | olivine |            | 42.07            | 0.01             | 0.00                           | 0.01                           | 8.54               | 0.11 | 0.34 | 51.26 | 0.01  | 0.00              | 0.00             | 102.35 | 0.915               |                  |                                 |
| Wadi Rajmi                  | opx     |            | 58.31            | 0.01             | 0.98                           | 0.51                           | 5.47               | 0.12 | 0.10 | 34.90 | 1.25  | 0.01              | 0.00             | 101.67 | 0.919               |                  |                                 |
| 0421.46 / 2721.55           | cpx     |            | —                | —                | —                              | —                              | —                  | —    | —    | —     | —     | —                 | —                | —      | —                   |                  |                                 |
|                             | spinel  |            | 0.03             | 0.06             | 15.30                          | 55.13                          | 19.86              | 0.31 | 0.03 | 11.10 | 0.01  | 0.01              | 0.00             | 101.83 | 0.526               | 0.707            | 0.012                           |
| 04123010                    | olivine |            | 41.75            | 0.01             | 0.00                           | 0.02                           | 7.90               | 0.11 | 0.39 | 51.74 | 0.06  | 0.00              | 0.00             | 101.99 | 0.921               |                  |                                 |
| Wadi Rajmi                  | opx     |            | —                | —                | —                              | —                              | —                  | —    | —    | —     | —     | —                 | —                | —      | —                   |                  |                                 |
| 0421.46 / 2721.55           | cpx     |            | —                | —                | —                              | —                              | —                  | —    | —    | —     | —     | —                 | —                | —      | —                   |                  |                                 |
|                             | spinel  |            | 0.03             | 0.18             | 13.35                          | 52.78                          | 24.52              | 0.27 | 0.11 | 10.89 | 0.00  | 0.00              | 0.00             | 102.12 | 0.520               | 0.726            | 0.041                           |
| 04123011                    | olivine |            | 41.94            | 0.00             | 0.01                           | 0.01                           | 8.48               | 0.11 | 0.43 | 51.35 | 0.02  | 0.01              | 0.00             | 102.33 | 0.915               |                  |                                 |
| Wadi Rajmi                  | opx     |            | 57.63            | 0.01             | 1.68                           | 0.56                           | 5.42               | 0.10 | 0.09 | 35.07 | 0.90  | 0.01              | 0.00             | 101.46 | 0.920               |                  |                                 |
| 0421.57 / 2721.43           | cpx     |            | —                | —                | —                              | —                              | —                  | —    | —    | —     | —     | —                 | —                | —      | —                   |                  |                                 |
|                             | spinel  |            | 0.05             | 0.04             | 20.27                          | 48.23                          | 20.23              | 0.25 | 0.07 | 12.37 | 0.00  | 0.01              | 0.00             | 101.51 | 0.571               | 0.615            | 0.022                           |

**Appendix 1. Continued**

| Reference No.               | Mineral | Mode (wt%) | SiO <sub>2</sub> | TiO <sub>2</sub> | Al <sub>2</sub> O <sub>3</sub> | Cr <sub>2</sub> O <sub>3</sub> | FeO <sup>T b</sup> | MnO  | NiO  | MgO   | CaO   | Na <sub>2</sub> O | K <sub>2</sub> O | Total  | Mg# <sup>c, d</sup> | Cr# <sup>d</sup> | Fe <sup>3+</sup> # <sup>d</sup> |
|-----------------------------|---------|------------|------------------|------------------|--------------------------------|--------------------------------|--------------------|------|------|-------|-------|-------------------|------------------|--------|---------------------|------------------|---------------------------------|
| UTM coordinate <sup>a</sup> |         |            |                  |                  |                                |                                |                    |      |      |       |       |                   |                  |        |                     |                  |                                 |
| 04123012                    | olivine |            | 41.73            | 0.00             | 0.00                           | 0.03                           | 8.42               | 0.12 | 0.35 | 51.35 | 0.04  | 0.00              | 0.00             | 102.04 | 0.916               |                  |                                 |
| Wadi Rajmi                  | opx     |            | —                | —                | —                              | —                              | —                  | —    | —    | —     | —     | —                 | —                | —      |                     |                  |                                 |
| 0421.57 / 2721.43           | cpx     |            | —                | —                | —                              | —                              | —                  | —    | —    | —     | —     | —                 | —                | —      |                     |                  |                                 |
|                             | spinel  |            | 0.03             | 0.21             | 14.86                          | 49.99                          | 25.30              | 0.30 | 0.11 | 10.68 | 0.04  | 0.00              | 0.00             | 101.52 | 0.510               | 0.693            | 0.044                           |
| 04123013                    | olivine |            | 41.88            | 0.01             | 0.00                           | 0.03                           | 8.01               | 0.10 | 0.37 | 51.57 | 0.06  | 0.00              | 0.00             | 102.04 | 0.920               |                  |                                 |
| Wadi Rajmi                  | opx     |            | —                | —                | —                              | —                              | —                  | —    | —    | —     | —     | —                 | —                | —      |                     |                  |                                 |
| 0421.42 / 2721.50           | cpx     |            | —                | —                | —                              | —                              | —                  | —    | —    | —     | —     | —                 | —                | —      |                     |                  |                                 |
|                             | spinel  |            | 0.02             | 0.22             | 11.76                          | 52.31                          | 26.39              | 0.32 | 0.06 | 10.05 | 0.02  | 0.00              | 0.00             | 101.16 | 0.490               | 0.749            | 0.050                           |
| 04123014                    | olivine |            | 41.85            | 0.02             | 0.00                           | 0.00                           | 8.43               | 0.08 | 0.36 | 50.87 | 0.01  | 0.00              | 0.00             | 101.62 | 0.915               |                  |                                 |
| Wadi Rajmi                  | opx     |            | 57.07            | 0.01             | 1.05                           | 0.47                           | 5.56               | 0.13 | 0.07 | 34.77 | 1.39  | 0.00              | 0.00             | 100.53 | 0.918               |                  |                                 |
| 0421.42 / 2721.50           | cpx     |            | —                | —                | —                              | —                              | —                  | —    | —    | —     | —     | —                 | —                | —      |                     |                  |                                 |
|                             | spinel  |            | 0.03             | 0.03             | 15.40                          | 53.22                          | 21.39              | 0.31 | 0.05 | 10.68 | 0.01  | 0.01              | 0.00             | 101.13 | 0.511               | 0.699            | 0.020                           |
| 04123015                    | olivine |            | 40.25            | 0.01             | 0.00                           | 0.00                           | 8.48               | 0.10 | 0.38 | 50.30 | 0.02  | 0.00              | 0.00             | 99.55  | 0.914               |                  |                                 |
| Wadi Rajmi                  | opx     |            | 57.77            | 0.01             | 1.39                           | 0.58                           | 5.56               | 0.12 | 0.06 | 35.04 | 0.50  | 0.00              | 0.00             | 101.03 | 0.918               |                  |                                 |
| 0421.16 / 2721.70           | cpx     |            | —                | —                | —                              | —                              | —                  | —    | —    | —     | —     | —                 | —                | —      |                     |                  |                                 |
|                             | spinel  |            | 0.03             | 0.06             | 18.41                          | 50.06                          | 21.04              | 0.28 | 0.06 | 11.28 | 0.00  | 0.01              | 0.00             | 101.22 | 0.531               | 0.646            | 0.020                           |
| 04123016                    | olivine |            | 41.92            | 0.00             | 0.00                           | 0.03                           | 8.33               | 0.11 | 0.35 | 51.54 | 0.04  | 0.00              | 0.00             | 102.32 | 0.917               |                  |                                 |
| Wadi Rajmi                  | opx     |            | —                | —                | —                              | —                              | —                  | —    | —    | —     | —     | —                 | —                | —      |                     |                  |                                 |
| 0421.16 / 2721.70           | cpx     |            | —                | —                | —                              | —                              | —                  | —    | —    | —     | —     | —                 | —                | —      |                     |                  |                                 |
|                             | spinel  |            | 0.04             | 0.21             | 12.95                          | 51.98                          | 25.57              | 0.36 | 0.07 | 10.24 | 0.01  | 0.00              | 0.00             | 101.44 | 0.495               | 0.729            | 0.044                           |
| 04123018                    | olivine |            | 42.14            | 0.01             | 0.00                           | 0.01                           | 8.73               | 0.08 | 0.42 | 51.42 | 0.02  | 0.00              | 0.00             | 102.84 | 0.913               |                  |                                 |
| Wadi Rajmi                  | opx     |            | 57.84            | 0.01             | 1.89                           | 0.66                           | 5.46               | 0.10 | 0.06 | 34.75 | 0.67  | 0.01              | 0.00             | 101.46 | 0.919               |                  |                                 |
| 0420.97 / 2721.60           | cpx     |            | 54.09            | 0.04             | 2.24                           | 1.13                           | 1.92               | 0.07 | 0.03 | 17.60 | 24.41 | 0.11              | 0.00             | 101.64 | 0.942               |                  |                                 |
|                             | spinel  |            | 0.04             | 0.06             | 23.17                          | 46.14                          | 19.44              | 0.23 | 0.08 | 12.75 | 0.01  | 0.01              | 0.00             | 101.92 | 0.578               | 0.572            | 0.017                           |
| 04123019                    | olivine |            | 41.23            | 0.01             | 0.00                           | 0.01                           | 8.71               | 0.14 | 0.36 | 50.35 | 0.02  | 0.00              | 0.00             | 100.82 | 0.912               |                  |                                 |
| Wadi Rajmi                  | opx     |            | 57.38            | 0.01             | 1.20                           | 0.55                           | 5.95               | 0.14 | 0.09 | 35.00 | 0.52  | 0.01              | 0.00             | 100.85 | 0.913               |                  |                                 |
| 0420.97 / 2721.60           | cpx     |            | —                | —                | —                              | —                              | —                  | —    | —    | —     | —     | —                 | —                | —      |                     |                  |                                 |
|                             | spinel  |            | 0.03             | 0.07             | 16.96                          | 51.68                          | 21.63              | 0.31 | 0.09 | 11.01 | 0.01  | 0.00              | 0.00             | 101.80 | 0.520               | 0.671            | 0.021                           |
| 04123020                    | olivine |            | 42.01            | 0.00             | 0.00                           | 0.01                           | 8.58               | 0.09 | 0.36 | 50.79 | 0.02  | 0.01              | 0.00             | 101.87 | 0.913               |                  |                                 |
| Wadi Rajmi                  | opx     |            | 57.76            | 0.01             | 1.41                           | 0.55                           | 5.52               | 0.10 | 0.09 | 34.89 | 0.87  | 0.00              | 0.00             | 101.20 | 0.919               |                  |                                 |
| 0421.14 / 2721.53           | cpx     |            | —                | —                | —                              | —                              | —                  | —    | —    | —     | —     | —                 | —                | —      |                     |                  |                                 |
|                             | spinel  |            | 0.04             | 0.03             | 18.83                          | 50.40                          | 20.47              | 0.24 | 0.09 | 11.92 | 0.00  | 0.01              | 0.00             | 102.05 | 0.553               | 0.642            | 0.020                           |
| 04123021                    | olivine |            | 41.99            | 0.00             | 0.00                           | 0.03                           | 8.41               | 0.13 | 0.33 | 51.29 | 0.02  | 0.00              | 0.00             | 102.20 | 0.916               |                  |                                 |
| Wadi Rajmi                  | opx     |            | —                | —                | —                              | —                              | —                  | —    | —    | —     | —     | —                 | —                | —      |                     |                  |                                 |
| 0421.14 / 2721.53           | cpx     |            | —                | —                | —                              | —                              | —                  | —    | —    | —     | —     | —                 | —                | —      |                     |                  |                                 |
|                             | spinel  |            | 0.04             | 0.13             | 13.37                          | 54.47                          | 22.70              | 0.35 | 0.07 | 10.14 | 0.02  | 0.01              | 0.00             | 101.31 | 0.491               | 0.732            | 0.025                           |

**Appendix 1. Continued**

| Reference No.     | Mineral | Mode (wt%) | SiO <sub>2</sub> | TiO <sub>2</sub> | Al <sub>2</sub> O <sub>3</sub> | Cr <sub>2</sub> O <sub>3</sub> | FeO <sup>T</sup> <sup>b</sup> | MnO  | NiO  | MgO   | CaO   | Na <sub>2</sub> O | K <sub>2</sub> O | Total  | Mg# <sup>c, d</sup> | Cr# <sup>d</sup> | Fe <sup>3+</sup> # <sup>d</sup> |
|-------------------|---------|------------|------------------|------------------|--------------------------------|--------------------------------|-------------------------------|------|------|-------|-------|-------------------|------------------|--------|---------------------|------------------|---------------------------------|
| 05010401          | olivine |            | 42.11            | 0.00             | 0.00                           | 0.01                           | 8.99                          | 0.10 | 0.37 | 51.23 | 0.02  | 0.00              | 0.00             | 102.84 | 0.910               |                  |                                 |
| Rayy              | opx     |            | 57.36            | 0.02             | 1.95                           | 0.59                           | 5.72                          | 0.13 | 0.09 | 34.48 | 1.15  | 0.00              | 0.00             | 101.51 | 0.915               |                  |                                 |
| 0412.92 / 2726.00 | cpx     |            | 54.85            | 0.04             | 2.09                           | 0.83                           | 2.06                          | 0.05 | 0.04 | 17.60 | 24.18 | 0.02              | 0.00             | 101.75 | 0.938               |                  |                                 |
|                   | spinel  |            | 0.01             | 0.08             | 21.60                          | 46.10                          | 21.24                         | 0.25 | 0.11 | 12.16 | 0.01  | 0.01              | 0.00             | 101.58 | 0.560               | 0.589            | 0.025                           |
| 05010403          | olivine |            | 41.99            | 0.01             | 0.00                           | 0.00                           | 8.75                          | 0.12 | 0.36 | 50.68 | 0.02  | 0.00              | 0.00             | 101.94 | 0.912               |                  |                                 |
| Rayy              | opx     |            | 57.81            | 0.03             | 1.55                           | 0.50                           | 5.88                          | 0.12 | 0.08 | 35.28 | 0.84  | 0.00              | 0.00             | 102.09 | 0.915               |                  |                                 |
| 0413.61 / 2725.59 | cpx     |            | 55.14            | 0.06             | 1.70                           | 0.74                           | 2.06                          | 0.08 | 0.03 | 17.87 | 24.06 | 0.04              | 0.00             | 101.77 | 0.939               |                  |                                 |
|                   | spinel  |            | 0.08             | 0.13             | 19.84                          | 47.33                          | 22.13                         | 0.27 | 0.11 | 11.64 | 0.01  | 0.01              | 0.00             | 101.54 | 0.540               | 0.615            | 0.027                           |
| 05010405          | olivine |            | 42.06            | 0.01             | 0.00                           | 0.01                           | 8.64                          | 0.12 | 0.39 | 51.25 | 0.02  | 0.00              | 0.00             | 102.50 | 0.914               |                  |                                 |
| Rayy              | opx     |            | 58.24            | 0.02             | 1.34                           | 0.48                           | 5.54                          | 0.11 | 0.11 | 34.41 | 1.27  | 0.00              | 0.00             | 101.53 | 0.917               |                  |                                 |
| 0414.21 / 2725.00 | cpx     |            | 55.03            | 0.01             | 1.38                           | 0.67                           | 2.09                          | 0.04 | 0.05 | 18.06 | 23.97 | 0.01              | 0.00             | 101.31 | 0.939               |                  |                                 |
|                   | spinel  |            | 0.03             | 0.03             | 17.89                          | 49.31                          | 22.02                         | 0.28 | 0.05 | 11.27 | 0.01  | 0.01              | 0.00             | 100.91 | 0.533               | 0.649            | 0.027                           |
| 05010501          | olivine |            | 42.10            | 0.01             | 0.01                           | 0.02                           | 9.05                          | 0.12 | 0.40 | 51.00 | 0.01  | 0.00              | 0.00             | 102.73 | 0.909               |                  |                                 |
| Rayy              | opx     |            | 57.33            | 0.01             | 2.12                           | 0.67                           | 5.53                          | 0.14 | 0.08 | 33.64 | 2.31  | 0.00              | 0.00             | 101.83 | 0.916               |                  |                                 |
| 0416.5 / 2721.5   | cpx     |            | 54.73            | 0.03             | 2.10                           | 0.90                           | 2.02                          | 0.04 | 0.05 | 17.47 | 24.35 | 0.02              | 0.00             | 101.71 | 0.939               |                  |                                 |
|                   | spinel  |            | 0.02             | 0.04             | 26.12                          | 42.81                          | 18.50                         | 0.21 | 0.10 | 13.23 | 0.00  | 0.01              | 0.00             | 101.03 | 0.596               | 0.524            | 0.014                           |
| 05010506          | olivine |            | 41.71            | 0.01             | 0.00                           | 0.00                           | 9.00                          | 0.10 | 0.41 | 50.84 | 0.02  | 0.00              | 0.00             | 102.10 | 0.910               |                  |                                 |
| Rayy              | opx     |            | 57.64            | 0.01             | 2.56                           | 0.68                           | 6.00                          | 0.10 | 0.10 | 33.95 | 0.65  | 0.00              | 0.00             | 101.70 | 0.910               |                  |                                 |
| 0415.49 / 2721.61 | cpx     |            | 54.12            | 0.07             | 2.12                           | 0.67                           | 2.17                          | 0.07 | 0.09 | 17.39 | 24.21 | 0.02              | 0.01             | 100.94 | 0.935               |                  |                                 |
|                   | spinel  |            | 0.02             | 0.05             | 31.35                          | 37.60                          | 17.00                         | 0.19 | 0.15 | 14.80 | 0.00  | 0.01              | 0.00             | 101.17 | 0.646               | 0.446            | 0.014                           |
| 05010509          | olivine |            | 40.65            | 0.00             | 0.00                           | 0.02                           | 9.37                          | 0.14 | 0.40 | 49.89 | 0.02  | 0.00              | 0.00             | 100.49 | 0.905               |                  |                                 |
| Rayy              | opx     |            | 58.02            | 0.00             | 2.13                           | 0.63                           | 6.02                          | 0.11 | 0.09 | 34.01 | 0.68  | 0.00              | 0.00             | 101.68 | 0.910               |                  |                                 |
| 0413.07 / 2722.06 | cpx     |            | 54.56            | 0.03             | 2.24                           | 0.76                           | 2.09                          | 0.07 | 0.04 | 17.28 | 24.41 | 0.01              | 0.00             | 101.49 | 0.936               |                  |                                 |
|                   | spinel  |            | 0.01             | 0.07             | 27.59                          | 40.62                          | 19.43                         | 0.24 | 0.09 | 13.26 | 0.00  | 0.01              | 0.00             | 101.32 | 0.593               | 0.497            | 0.018                           |
| 05010511          | olivine |            | —                | —                | —                              | —                              | —                             | —    | —    | —     | —     | —                 | —                | —      | —                   |                  |                                 |
| Rayy              | opx     |            | 58.45            | 0.00             | 1.33                           | 0.53                           | 5.89                          | 0.12 | 0.07 | 34.47 | 0.70  | 0.01              | 0.00             | 101.57 | 0.913               |                  |                                 |
| 0412.03 / 2723.87 | cpx     |            | 55.47            | 0.02             | 1.22                           | 0.52                           | 2.00                          | 0.06 | 0.02 | 17.98 | 24.20 | 0.03              | 0.01             | 101.51 | 0.941               |                  |                                 |
|                   | spinel  |            | 0.00             | 0.08             | 16.87                          | 52.22                          | 21.18                         | 0.26 | 0.06 | 11.03 | 0.00  | 0.00              | 0.00             | 101.71 | 0.520               | 0.675            | 0.018                           |
| 05010513          | olivine |            | 41.58            | 0.01             | 0.00                           | 0.03                           | 8.86                          | 0.12 | 0.36 | 50.73 | 0.01  | 0.00              | 0.00             | 101.70 | 0.911               |                  |                                 |
| Rayy              | opx     |            | 58.46            | 0.01             | 1.44                           | 0.49                           | 5.87                          | 0.09 | 0.09 | 34.17 | 1.06  | 0.00              | 0.00             | 101.69 | 0.912               |                  |                                 |
| 0411.64 / 2724.01 | cpx     |            | 54.58            | 0.04             | 1.82                           | 0.91                           | 2.09                          | 0.09 | 0.04 | 17.42 | 23.96 | 0.06              | 0.00             | 101.01 | 0.937               |                  |                                 |
|                   | spinel  |            | 0.02             | 0.08             | 19.98                          | 48.77                          | 20.20                         | 0.24 | 0.04 | 11.53 | 0.00  | 0.00              | 0.00             | 100.87 | 0.538               | 0.621            | 0.015                           |
| 05010515          | olivine |            | 41.75            | 0.00             | 0.00                           | 0.01                           | 8.61                          | 0.12 | 0.37 | 50.72 | 0.00  | 0.00              | 0.00             | 101.60 | 0.913               |                  |                                 |
| Rayy              | opx     |            | 58.70            | 0.02             | 1.01                           | 0.34                           | 5.82                          | 0.12 | 0.09 | 34.72 | 0.72  | 0.01              | 0.00             | 101.55 | 0.914               |                  |                                 |
| 0411.48 / 2724.51 | cpx     |            | —                | —                | —                              | —                              | —                             | —    | —    | —     | —     | —                 | —                | —      | —                   |                  |                                 |
|                   | spinel  |            | 0.03             | 0.07             | 16.12                          | 51.24                          | 22.40                         | 0.28 | 0.05 | 10.05 | 0.01  | 0.00              | 0.00             | 100.26 | 0.485               | 0.681            | 0.021                           |

**Appendix 1. Continued**

| Reference No.     | Mineral | Mode (wt%) | SiO <sub>2</sub> | TiO <sub>2</sub> | Al <sub>2</sub> O <sub>3</sub> | Cr <sub>2</sub> O <sub>3</sub> | FeO <sup>T b</sup> | MnO  | NiO  | MgO   | CaO   | Na <sub>2</sub> O | K <sub>2</sub> O | Total  | Mg# <sup>c, d</sup> | Cr# <sup>d</sup> | Fe <sup>3+</sup> # <sup>d</sup> |
|-------------------|---------|------------|------------------|------------------|--------------------------------|--------------------------------|--------------------|------|------|-------|-------|-------------------|------------------|--------|---------------------|------------------|---------------------------------|
| 05010517          | olivine |            | 41.47            | 0.01             | 0.01                           | 0.01                           | 8.63               | 0.09 | 0.37 | 50.91 | 0.02  | 0.00              | 0.00             | 101.52 | 0.913               |                  |                                 |
| Rayy              | opx     |            | 57.14            | 0.03             | 1.87                           | 0.61                           | 5.82               | 0.12 | 0.09 | 33.75 | 1.13  | 0.01              | 0.00             | 100.56 | 0.912               |                  |                                 |
| 0410.48 / 2724.60 | cpx     |            | 53.69            | 0.06             | 1.58                           | 0.51                           | 2.10               | 0.08 | 0.09 | 17.72 | 23.84 | 0.02              | 0.00             | 99.68  | 0.938               |                  |                                 |
|                   | spinel  |            | 0.01             | 0.09             | 22.75                          | 46.39                          | 18.77              | 0.24 | 0.09 | 13.04 | 0.00  | 0.01              | 0.00             | 101.39 | 0.594               | 0.578            | 0.017                           |
| 05010519          | olivine |            | 41.73            | 0.01             | 0.00                           | 0.00                           | 8.70               | 0.12 | 0.38 | 50.94 | 0.01  | 0.00              | 0.00             | 101.90 | 0.913               |                  |                                 |
| Rayy              | opx     |            | 58.64            | 0.01             | 0.71                           | 0.36                           | 5.69               | 0.11 | 0.12 | 34.52 | 0.91  | 0.00              | 0.00             | 101.07 | 0.915               |                  |                                 |
| 0410.34 / 2724.96 | cpx     |            | —                | —                | —                              | —                              | —                  | —    | —    | —     | —     | —                 | —                | —      |                     |                  |                                 |
|                   | spinel  |            | 0.02             | 0.07             | 12.08                          | 55.21                          | 23.32              | 0.30 | 0.05 | 9.08  | 0.01  | 0.00              | 0.00             | 100.15 | 0.450               | 0.754            | 0.022                           |
| 05010601          | olivine |            | 41.08            | 0.00             | 0.00                           | 0.01                           | 8.78               | 0.13 | 0.41 | 50.23 | 0.01  | 0.00              | 0.00             | 100.66 | 0.911               |                  |                                 |
| Wadi Shuwayhah    | opx     |            | 58.70            | 0.02             | 1.01                           | 0.49                           | 5.75               | 0.11 | 0.08 | 34.37 | 0.86  | 0.00              | 0.00             | 101.39 | 0.914               |                  |                                 |
| 0411.96 / 2720.83 | cpx     |            | 55.77            | 0.03             | 0.98                           | 0.52                           | 1.89               | 0.02 | 0.00 | 17.92 | 24.20 | 0.06              | 0.00             | 101.40 | 0.944               |                  |                                 |
|                   | spinel  |            | 0.01             | 0.08             | 14.86                          | 52.32                          | 21.82              | 0.34 | 0.05 | 10.23 | 0.01  | 0.02              | 0.00             | 99.74  | 0.499               | 0.702            | 0.022                           |
| 05010603          | olivine |            | 41.51            | 0.02             | 0.02                           | 0.02                           | 8.48               | 0.10 | 0.39 | 50.71 | 0.02  | 0.00              | 0.00             | 101.26 | 0.914               |                  |                                 |
| Wadi Shuwayhah    | opx     |            | 58.48            | 0.02             | 1.34                           | 0.51                           | 5.58               | 0.12 | 0.09 | 34.29 | 1.11  | 0.02              | 0.00             | 101.55 | 0.916               |                  |                                 |
| 0408.60 / 2721.00 | cpx     |            | 55.21            | 0.03             | 1.67                           | 0.95                           | 1.83               | 0.06 | 0.07 | 17.47 | 24.20 | 0.21              | 0.00             | 101.70 | 0.944               |                  |                                 |
|                   | spinel  |            | 0.03             | 0.06             | 19.29                          | 50.13                          | 18.90              | 0.24 | 0.08 | 12.06 | 0.01  | 0.00              | 0.00             | 100.81 | 0.564               | 0.635            | 0.013                           |
| 05010605          | olivine |            | 41.32            | 0.01             | 0.00                           | 0.01                           | 8.77               | 0.11 | 0.40 | 50.37 | 0.02  | 0.00              | 0.00             | 101.02 | 0.911               |                  |                                 |
| Wadi Shuwayhah    | opx     |            | 57.04            | 0.04             | 2.70                           | 0.67                           | 5.86               | 0.13 | 0.08 | 32.98 | 1.18  | 0.00              | 0.00             | 100.68 | 0.909               |                  |                                 |
| 0407.9 / 2720.6   | cpx     |            | 53.53            | 0.08             | 3.35                           | 1.15                           | 2.17               | 0.08 | 0.04 | 16.89 | 23.77 | 0.04              | 0.00             | 101.10 | 0.932               |                  |                                 |
|                   | spinel  |            | 0.02             | 0.08             | 32.06                          | 36.64                          | 16.79              | 0.17 | 0.15 | 15.14 | 0.01  | 0.00              | 0.00             | 101.06 | 0.658               | 0.434            | 0.015                           |
| 05010606          | olivine |            | 41.27            | 0.01             | 0.01                           | 0.02                           | 8.76               | 0.13 | 0.36 | 50.37 | 0.00  | 0.00              | 0.00             | 100.93 | 0.911               |                  |                                 |
| Wadi Shuwayhah    | opx     |            | 57.34            | 0.02             | 2.45                           | 0.65                           | 5.81               | 0.12 | 0.09 | 33.41 | 1.07  | 0.00              | 0.00             | 100.96 | 0.911               |                  |                                 |
| 0408.2 / 2721.7   | cpx     |            | 53.65            | 0.05             | 2.72                           | 1.00                           | 1.99               | 0.07 | 0.05 | 17.01 | 24.00 | 0.01              | 0.00             | 100.55 | 0.938               |                  |                                 |
|                   | spinel  |            | 0.02             | 0.04             | 29.67                          | 38.54                          | 17.34              | 0.20 | 0.10 | 14.30 | 0.01  | 0.00              | 0.00             | 100.22 | 0.635               | 0.466            | 0.015                           |
| 05010608          | olivine |            | 41.80            | 0.01             | 0.00                           | 0.00                           | 8.47               | 0.11 | 0.39 | 51.07 | 0.02  | 0.00              | 0.00             | 101.86 | 0.915               |                  |                                 |
| Wadi Shuwayhah    | opx     |            | 58.58            | 0.01             | 1.50                           | 0.56                           | 5.41               | 0.14 | 0.09 | 34.60 | 0.66  | 0.01              | 0.00             | 101.56 | 0.919               |                  |                                 |
| 0409.56 / 2722.24 | cpx     |            | —                | —                | —                              | —                              | —                  | —    | —    | —     | —     | —                 | —                | —      |                     |                  |                                 |
|                   | spinel  |            | 0.01             | 0.07             | 21.33                          | 47.10                          | 19.03              | 0.25 | 0.09 | 12.43 | 0.01  | 0.01              | 0.00             | 100.31 | 0.577               | 0.597            | 0.017                           |
