# Supplementary material
Source: publisher figshare collection journal article supplement (https://geolsoc.figshare.com/articles/dataset/_/3453521)
Supplement: Supplementary file 3 [file 1]

**Appendix 3.** Major element compositions (wt%) of whole rock peridotites from the northern Fizh mantle section in the northern Oman ophiolite

| Reference no | SiO <sub>2</sub> | TiO <sub>2</sub> | Al <sub>2</sub> O <sub>3</sub> | FeO <sup>T a</sup> | MnO   | MgO   | CaO   | Na <sub>2</sub> O | K <sub>2</sub> O | P <sub>2</sub> O <sub>5</sub> | Cr <sub>2</sub> O <sub>3</sub> | NiO   | Total  | Mg# <sup>b</sup> | LOI  |
|--------------|------------------|------------------|--------------------------------|--------------------|-------|-------|-------|-------------------|------------------|-------------------------------|--------------------------------|-------|--------|------------------|------|
| 99111805     | 42.19            | 0.009            | 0.764                          | 7.41               | 0.119 | 42.08 | 0.764 | 0.000             | 0.003            | 0.001                         | 0.383                          | 0.296 | 100.14 | 0.910            | 6.1  |
| 99111901     | 42.64            | 0.008            | 0.856                          | 7.54               | 0.122 | 39.99 | 0.885 | 0.007             | 0.003            | 0.001                         | 0.388                          | 0.282 | 99.88  | 0.904            | 7.2  |
| 99111905     | 37.58            | 0.008            | 0.174                          | 8.45               | 0.123 | 44.39 | 0.119 | 0.000             | 0.003            | 0.002                         | 0.413                          | 0.309 | 100.73 | 0.904            | 9.2  |
| 99112003     | 41.70            | 0.007            | 0.445                          | 7.58               | 0.122 | 41.34 | 0.684 | 0.006             | 0.003            | 0.001                         | 0.403                          | 0.294 | 99.99  | 0.907            | 7.4  |
| 99112102     | 41.22            | 0.007            | 0.678                          | 7.30               | 0.116 | 40.82 | 0.775 | 0.005             | 0.003            | 0.001                         | 0.376                          | 0.293 | 99.97  | 0.909            | 8.4  |
| 99112104     | 43.38            | 0.010            | 0.416                          | 7.51               | 0.127 | 41.56 | 0.587 | 0.010             | 0.003            | 0.001                         | 0.411                          | 0.280 | 99.97  | 0.908            | 5.7  |
| 99112105     | 41.09            | 0.006            | 0.369                          | 7.54               | 0.121 | 42.26 | 0.513 | 0.009             | 0.003            | 0.001                         | 0.462                          | 0.296 | 99.60  | 0.909            | 6.9  |
| 99112108     | 41.48            | 0.009            | 0.795                          | 7.63               | 0.124 | 40.70 | 1.03  | 0.007             | 0.003            | 0.001                         | 0.397                          | 0.286 | 99.48  | 0.905            | 7.0  |
| 99112301     | 42.61            | 0.017            | 1.11                           | 7.34               | 0.120 | 39.88 | 1.27  | 0.002             | 0.003            | 0.001                         | 0.387                          | 0.279 | 99.52  | 0.906            | 6.5  |
| 99112304     | 40.54            | 0.009            | 0.302                          | 7.78               | 0.123 | 42.56 | 0.350 | 0.008             | 0.005            | 0.001                         | 0.400                          | 0.303 | 99.77  | 0.907            | 7.4  |
| 99112307     | 40.61            | 0.007            | 0.382                          | 7.84               | 0.122 | 41.70 | 0.655 | 0.011             | 0.003            | 0.001                         | 0.448                          | 0.292 | 99.76  | 0.905            | 7.7  |
| 99112309     | 40.06            | 0.007            | 0.293                          | 7.46               | 0.112 | 43.35 | 0.257 | 0.007             | 0.003            | 0.001                         | 0.378                          | 0.322 | 99.61  | 0.912            | 7.4  |
| 99112310     | 40.69            | 0.007            | 0.380                          | 7.55               | 0.120 | 42.28 | 0.472 | 0.004             | 0.003            | 0.001                         | 0.379                          | 0.296 | 100.03 | 0.909            | 7.9  |
| 99112405     | 41.07            | 0.009            | 0.552                          | 7.64               | 0.124 | 40.23 | 1.23  | 0.006             | 0.003            | 0.001                         | 0.417                          | 0.281 | 99.67  | 0.904            | 8.1  |
| 99112407     | 40.21            | 0.009            | 0.653                          | 7.59               | 0.123 | 41.39 | 0.998 | 0.007             | 0.003            | 0.001                         | 0.388                          | 0.293 | 99.02  | 0.907            | 7.4  |
| 99112503     | 40.52            | 0.009            | 0.271                          | 7.88               | 0.124 | 42.25 | 0.483 | 0.009             | 0.003            | 0.001                         | 0.334                          | 0.304 | 99.90  | 0.905            | 7.7  |
| 99112507     | 41.03            | 0.007            | 0.690                          | 7.44               | 0.117 | 42.27 | 0.780 | 0.011             | 0.003            | 0.001                         | 0.380                          | 0.296 | 100.35 | 0.910            | 7.3  |
| 99112510     | 42.43            | 0.008            | 0.642                          | 7.67               | 0.124 | 42.99 | 0.962 | 0.008             | 0.003            | 0.001                         | 0.383                          | 0.304 | 100.07 | 0.909            | 4.5  |
| 99112701     | 39.77            | 0.008            | 0.362                          | 7.01               | 0.114 | 40.03 | 0.822 | 0.007             | 0.001            | 0.001                         | 0.363                          | 0.281 | 99.48  | 0.911            | 10.7 |
| 99112703     | 40.25            | 0.006            | 0.517                          | 7.14               | 0.116 | 41.30 | 0.619 | 0.003             | 0.003            | 0.001                         | 0.391                          | 0.289 | 99.67  | 0.912            | 9.0  |
| 99112704     | 40.85            | 0.010            | 0.684                          | 7.15               | 0.114 | 42.11 | 0.614 | 0.007             | 0.003            | 0.001                         | 0.372                          | 0.296 | 100.16 | 0.913            | 7.9  |
| 99112706     | 40.22            | 0.008            | 0.498                          | 7.64               | 0.120 | 41.48 | 0.497 | 0.013             | 0.003            | 0.001                         | 0.342                          | 0.308 | 99.60  | 0.906            | 8.5  |
| 99112707     | 42.19            | 0.019            | 0.844                          | 7.53               | 0.116 | 42.52 | 0.662 | 0.006             | 0.003            | 0.002                         | 0.362                          | 0.302 | 100.65 | 0.910            | 6.1  |
| 99112708     | 40.62            | 0.009            | 0.736                          | 7.80               | 0.124 | 41.39 | 0.666 | 0.008             | 0.002            | 0.001                         | 0.323                          | 0.295 | 99.55  | 0.904            | 7.6  |
| 99112710     | 41.03            | 0.007            | 0.420                          | 7.67               | 0.123 | 41.38 | 0.611 | 0.011             | 0.001            | 0.001                         | 0.364                          | 0.290 | 99.73  | 0.906            | 7.8  |
| 99112802     | 39.71            | 0.006            | 0.245                          | 7.42               | 0.119 | 40.97 | 0.406 | 0.007             | 0.001            | 0.001                         | 0.398                          | 0.288 | 99.48  | 0.908            | 9.9  |
| 99112803     | 41.19            | 0.015            | 0.905                          | 7.15               | 0.115 | 40.82 | 1.15  | 0.009             | 0.003            | 0.001                         | 0.411                          | 0.286 | 100.09 | 0.911            | 8.0  |
| 99112804     | 41.09            | 0.008            | 0.338                          | 7.43               | 0.121 | 40.66 | 0.532 | 0.009             | 0.003            | 0.001                         | 0.422                          | 0.283 | 100.07 | 0.907            | 9.2  |
| 99112805     | 41.01            | 0.013            | 0.879                          | 7.42               | 0.120 | 40.04 | 1.14  | 0.005             | 0.003            | 0.001                         | 0.395                          | 0.281 | 100.14 | 0.906            | 8.8  |
| 99112807     | 38.13            | 0.005            | 0.129                          | 8.01               | 0.114 | 43.63 | 0.174 | 0.003             | 0.003            | 0.001                         | 0.413                          | 0.326 | 100.64 | 0.907            | 9.7  |
| 99112809     | 40.77            | 0.009            | 0.665                          | 7.35               | 0.118 | 41.50 | 0.715 | 0.004             | 0.003            | 0.001                         | 0.384                          | 0.292 | 100.14 | 0.910            | 8.3  |
| 99112811     | 42.57            | 0.012            | 0.935                          | 7.53               | 0.122 | 39.93 | 1.23  | 0.005             | 0.003            | 0.001                         | 0.421                          | 0.280 | 100.27 | 0.904            | 7.2  |
| 99112812     | 42.35            | 0.007            | 0.480                          | 7.72               | 0.125 | 42.18 | 0.820 | 0.004             | 0.003            | 0.001                         | 0.417                          | 0.297 | 99.53  | 0.907            | 5.1  |
| 99112901     | 38.47            | 0.008            | 0.393                          | 6.76               | 0.110 | 40.08 | 0.464 | 0.011             | 0.001            | 0.001                         | 0.431                          | 0.278 | 99.76  | 0.914            | 12.8 |
| 99112905     | 40.64            | 0.008            | 0.320                          | 7.37               | 0.119 | 41.01 | 0.382 | 0.006             | 0.003            | 0.001                         | 0.392                          | 0.285 | 100.08 | 0.908            | 9.5  |
| 99112906     | 38.99            | 0.008            | 0.346                          | 7.70               | 0.117 | 42.09 | 0.429 | 0.009             | 0.002            | 0.001                         | 0.338                          | 0.307 | 100.05 | 0.907            | 9.7  |
| 99112908     | 39.67            | 0.013            | 0.933                          | 7.22               | 0.115 | 39.81 | 1.04  | 0.017             | 0.002            | 0.001                         | 0.372                          | 0.279 | 99.88  | 0.908            | 10.4 |
| 99112910     | 40.19            | 0.008            | 0.433                          | 7.60               | 0.114 | 43.42 | 0.455 | 0.004             | 0.003            | 0.001                         | 0.375                          | 0.319 | 100.89 | 0.911            | 8.0  |
| 99112912     | 41.36            | 0.011            | 0.805                          | 7.39               | 0.119 | 40.84 | 1.20  | 0.013             | 0.001            | 0.001                         | 0.382                          | 0.288 | 99.78  | 0.908            | 7.4  |
| 99112914     | 40.26            | 0.008            | 0.594                          | 7.48               | 0.119 | 41.93 | 0.686 | 0.011             | 0.001            | 0.001                         | 0.363                          | 0.299 | 99.61  | 0.909            | 7.8  |
| 99112915     | 41.22            | 0.008            | 0.475                          | 7.60               | 0.121 | 41.50 | 0.690 | 0.006             | 0.003            | 0.001                         | 0.406                          | 0.295 | 99.74  | 0.907            | 7.4  |
| 99120101     | 41.44            | 0.011            | 1.12                           | 7.01               | 0.121 | 38.16 | 1.55  | 0.009             | 0.003            | 0.001                         | 0.409                          | 0.260 | 99.76  | 0.907            | 9.7  |
| 99120110     | 40.92            | 0.011            | 0.959                          | 7.14               | 0.116 | 38.95 | 1.20  | 0.005             | 0.003            | 0.001                         | 0.372                          | 0.277 | 100.05 | 0.907            | 10.1 |
| 99120204     | 39.97            | 0.006            | 0.578                          | 7.22               | 0.116 | 40.51 | 0.659 | 0.003             | 0.003            | 0.001                         | 0.378                          | 0.292 | 99.68  | 0.909            | 9.9  |
| 99120207     | 41.45            | 0.007            | 0.424                          | 7.22               | 0.116 | 40.47 | 0.530 | 0.007             | 0.003            | 0.001                         | 0.405                          | 0.287 | 100.15 | 0.909            | 9.2  |
| 99120210     | 41.12            | 0.008            | 0.581                          | 7.35               | 0.115 | 41.33 | 0.666 | 0.008             | 0.003            | 0.001                         | 0.392                          | 0.292 | 100.30 | 0.909            | 8.4  |
| 99120212     | 41.24            | 0.009            | 0.486                          | 7.27               | 0.118 | 40.46 | 0.600 | 0.006             | 0.003            | 0.001                         | 0.442                          | 0.280 | 100.36 | 0.908            | 9.4  |
| 99120213     | 42.31            | 0.009            | 0.618                          | 7.29               | 0.122 | 40.31 | 0.955 | 0.003             | 0.003            | 0.001                         | 0.489                          | 0.275 | 100.06 | 0.908            | 7.7  |
| 99120216     | 40.74            | 0.008            | 0.779                          | 6.85               | 0.111 | 39.84 | 0.832 | 0.004             | 0.003            | 0.001                         | 0.359                          | 0.290 | 99.81  | 0.912            | 10.0 |
| 99120305     | 40.93            | 0.012            | 0.933                          | 7.07               | 0.115 | 39.89 | 1.07  | 0.002             | 0.003            | 0.001                         | 0.373                          | 0.280 | 100.21 | 0.910            | 9.5  |

<sup>a</sup>Total Fe as FeO<sup>T</sup>;<sup>b</sup>Mg# = Mg/(Mg+Fe<sup>T</sup>).

Appendix 3. *Continued.*

| Reference no | SiO <sub>2</sub> | TiO <sub>2</sub> | Al <sub>2</sub> O <sub>3</sub> | FeO <sup>T a</sup> | MnO   | MgO   | CaO   | Na <sub>2</sub> O | K <sub>2</sub> O | P <sub>2</sub> O <sub>5</sub> | Cr <sub>2</sub> O <sub>3</sub> | NiO   | Total  | Mg# <sup>b</sup> | LOI  |
|--------------|------------------|------------------|--------------------------------|--------------------|-------|-------|-------|-------------------|------------------|-------------------------------|--------------------------------|-------|--------|------------------|------|
| 99120306     | 41.05            | 0.008            | 0.392                          | 7.36               | 0.119 | 40.97 | 0.500 | 0.003             | 0.003            | 0.001                         | 0.426                          | 0.282 | 100.10 | 0.908            | 9.0  |
| 99120307     | 40.66            | 0.009            | 0.554                          | 6.91               | 0.115 | 39.88 | 0.874 | 0.003             | 0.003            | 0.001                         | 0.434                          | 0.277 | 99.75  | 0.911            | 10.0 |
| 99120310     | 40.21            | 0.007            | 0.478                          | 7.09               | 0.115 | 40.08 | 0.539 | 0.004             | 0.003            | 0.001                         | 0.396                          | 0.285 | 99.82  | 0.910            | 10.6 |
| 99120602     | 41.86            | 0.012            | 1.13                           | 7.28               | 0.120 | 39.10 | 1.27  | 0.010             | 0.003            | 0.001                         | 0.392                          | 0.273 | 99.98  | 0.905            | 8.5  |
| 99120606     | 42.09            | 0.012            | 1.12                           | 7.31               | 0.125 | 38.80 | 1.43  | 0.006             | 0.003            | 0.001                         | 0.405                          | 0.263 | 99.63  | 0.904            | 8.1  |
| 99120614     | 42.54            | 0.009            | 0.799                          | 7.21               | 0.121 | 39.95 | 0.881 | 0.007             | 0.004            | 0.001                         | 0.395                          | 0.279 | 100.01 | 0.908            | 7.8  |
| 99120702     | 39.03            | 0.006            | 0.278                          | 7.47               | 0.117 | 40.53 | 0.392 | 0.006             | 0.003            | 0.001                         | 0.380                          | 0.286 | 99.97  | 0.906            | 11.5 |
| 99120901     | 40.99            | 0.010            | 0.928                          | 7.41               | 0.121 | 39.67 | 1.19  | 0.004             | 0.003            | 0.001                         | 0.359                          | 0.277 | 99.95  | 0.905            | 9.0  |
| 99120903     | 41.01            | 0.016            | 1.12                           | 7.01               | 0.116 | 39.49 | 1.09  | 0.006             | 0.003            | 0.001                         | 0.416                          | 0.273 | 99.55  | 0.909            | 9.0  |
| 99120904     | 39.86            | 0.007            | 0.496                          | 6.91               | 0.111 | 40.91 | 0.527 | 0.007             | 0.003            | 0.001                         | 0.409                          | 0.287 | 99.57  | 0.913            | 10.0 |
| 99120910     | 39.24            | 0.006            | 0.467                          | 7.30               | 0.115 | 39.54 | 0.602 | 0.003             | 0.003            | 0.001                         | 0.436                          | 0.281 | 99.58  | 0.906            | 11.6 |
| 99121010     | 41.70            | 0.010            | 0.527                          | 7.41               | 0.123 | 40.68 | 0.738 | 0.011             | 0.003            | 0.001                         | 0.451                          | 0.282 | 99.50  | 0.907            | 7.6  |
| 99121012     | 42.38            | 0.008            | 0.457                          | 7.84               | 0.127 | 42.16 | 0.674 | 0.008             | 0.003            | 0.001                         | 0.405                          | 0.294 | 100.06 | 0.906            | 5.7  |
| 99121013     | 40.46            | 0.009            | 0.535                          | 7.56               | 0.118 | 41.77 | 0.558 | 0.004             | 0.003            | 0.001                         | 0.382                          | 0.296 | 99.73  | 0.908            | 8.0  |
| 99121101     | 39.35            | 0.009            | 0.771                          | 7.17               | 0.117 | 39.27 | 0.949 | 0.008             | 0.003            | 0.001                         | 0.383                          | 0.276 | 99.46  | 0.907            | 11.1 |
| 99121104     | 40.30            | 0.007            | 0.567                          | 6.95               | 0.111 | 40.76 | 0.591 | 0.003             | 0.003            | 0.001                         | 0.381                          | 0.295 | 99.63  | 0.913            | 9.7  |
| 99121106     | 40.98            | 0.009            | 0.599                          | 7.36               | 0.118 | 41.54 | 0.768 | 0.006             | 0.003            | 0.001                         | 0.388                          | 0.294 | 100.03 | 0.910            | 8.0  |
| 99121110     | 39.65            | 0.007            | 0.261                          | 6.96               | 0.112 | 40.49 | 0.368 | 0.003             | 0.003            | 0.001                         | 0.430                          | 0.286 | 99.60  | 0.912            | 11.0 |
| 99121111     | 39.88            | 0.006            | 0.361                          | 7.41               | 0.116 | 42.05 | 0.415 | 0.006             | 0.003            | 0.001                         | 0.406                          | 0.292 | 100.28 | 0.910            | 9.3  |
| 99121112     | 40.57            | 0.009            | 0.405                          | 7.33               | 0.117 | 41.69 | 0.520 | 0.010             | 0.004            | 0.001                         | 0.388                          | 0.294 | 99.90  | 0.910            | 8.6  |
| 99121303     | 41.78            | 0.074            | 1.38                           | 8.64               | 0.135 | 39.16 | 0.985 | 0.052             | 0.004            | 0.001                         | 0.330                          | 0.272 | 99.80  | 0.890            | 7.0  |
| 99121305     | 44.27            | 0.007            | 0.624                          | 7.63               | 0.127 | 41.67 | 0.915 | 0.005             | 0.004            | 0.001                         | 0.400                          | 0.294 | 100.28 | 0.907            | 4.3  |
| 99121401     | 44.51            | 0.010            | 0.897                          | 7.04               | 0.125 | 39.32 | 0.909 | 0.008             | 0.003            | 0.001                         | 0.638                          | 0.232 | 99.67  | 0.909            | 6.0  |
| 99121403     | 40.85            | 0.005            | 0.432                          | 7.54               | 0.120 | 41.31 | 0.653 | 0.003             | 0.003            | 0.001                         | 0.407                          | 0.292 | 99.80  | 0.907            | 8.2  |
| 99121405     | 41.97            | 0.006            | 0.421                          | 7.40               | 0.124 | 40.62 | 0.823 | 0.006             | 0.003            | 0.001                         | 0.466                          | 0.280 | 100.11 | 0.907            | 8.0  |
| 99121407     | 40.72            | 0.006            | 0.553                          | 7.11               | 0.120 | 40.67 | 0.939 | 0.003             | 0.003            | 0.001                         | 0.438                          | 0.280 | 99.58  | 0.911            | 8.7  |
| 99121410     | 40.02            | 0.006            | 0.325                          | 7.48               | 0.119 | 41.92 | 0.422 | 0.008             | 0.003            | 0.001                         | 0.372                          | 0.302 | 99.75  | 0.909            | 8.8  |
| 99121412     | 41.05            | 0.006            | 0.537                          | 7.10               | 0.113 | 41.77 | 0.489 | 0.006             | 0.003            | 0.001                         | 0.381                          | 0.299 | 100.13 | 0.913            | 8.4  |
| 99121701     | 41.11            | 0.007            | 0.670                          | 7.38               | 0.120 | 39.72 | 0.794 | 0.013             | 0.003            | 0.001                         | 0.384                          | 0.278 | 99.95  | 0.906            | 9.5  |
| 99121806     | 43.74            | 0.012            | 0.947                          | 7.06               | 0.127 | 39.34 | 2.032 | 0.011             | 0.003            | 0.001                         | 0.441                          | 0.263 | 99.39  | 0.909            | 5.4  |
| 99121808     | 42.15            | 0.009            | 0.879                          | 7.36               | 0.120 | 40.06 | 0.916 | 0.022             | 0.005            | 0.001                         | 0.397                          | 0.282 | 99.79  | 0.907            | 7.6  |
| 00121902     | 40.89            | 0.009            | 0.613                          | 7.41               | 0.119 | 41.01 | 0.669 | 0.003             | 0.003            | 0.001                         | 0.326                          | 0.295 | 99.81  | 0.908            | 8.5  |
| 00121908     | 41.11            | 0.008            | 0.697                          | 7.31               | 0.119 | 40.62 | 0.797 | 0.009             | 0.005            | 0.001                         | 0.343                          | 0.293 | 99.68  | 0.908            | 8.4  |
| 00122202     | 42.17            | 0.007            | 0.339                          | 7.60               | 0.123 | 42.41 | 0.463 | 0.002             | 0.003            | 0.001                         | 0.397                          | 0.309 | 99.58  | 0.909            | 5.8  |
| 00122203     | 42.29            | 0.012            | 0.893                          | 7.30               | 0.121 | 39.84 | 1.17  | 0.016             | 0.003            | 0.001                         | 0.412                          | 0.277 | 99.98  | 0.907            | 7.6  |
| 00122206     | 42.81            | 0.013            | 0.909                          | 7.47               | 0.123 | 41.75 | 1.18  | 0.005             | 0.002            | 0.001                         | 0.419                          | 0.329 | 99.54  | 0.909            | 4.5  |
| 00122208     | 41.64            | 0.016            | 1.16                           | 7.07               | 0.120 | 39.34 | 1.85  | 0.051             | 0.050            | 0.001                         | 0.459                          | 0.262 | 99.89  | 0.908            | 7.9  |
| 00122603     | 40.97            | 0.006            | 0.392                          | 7.59               | 0.123 | 42.02 | 0.597 | 0.007             | 0.003            | 0.001                         | 0.375                          | 0.302 | 99.72  | 0.908            | 7.3  |
| 00122607     | 42.26            | 0.012            | 0.840                          | 7.18               | 0.117 | 41.20 | 0.900 | 0.005             | 0.003            | 0.001                         | 0.379                          | 0.295 | 99.57  | 0.911            | 6.4  |
| 00122802     | 41.00            | 0.008            | 0.582                          | 7.35               | 0.116 | 42.25 | 0.595 | 0.020             | 0.003            | 0.001                         | 0.410                          | 0.295 | 100.03 | 0.911            | 7.4  |
| 00122805     | 39.92            | 0.005            | 0.524                          | 7.42               | 0.116 | 40.58 | 0.761 | 0.010             | 0.003            | 0.001                         | 0.376                          | 0.296 | 99.62  | 0.907            | 9.6  |
| 00123002     | 42.31            | 0.011            | 0.601                          | 7.73               | 0.124 | 41.41 | 0.991 | 0.011             | 0.003            | 0.001                         | 0.395                          | 0.289 | 99.67  | 0.905            | 5.8  |
| 00123004     | 41.02            | 0.006            | 0.318                          | 7.50               | 0.122 | 41.54 | 0.504 | 0.011             | 0.004            | 0.001                         | 0.382                          | 0.285 | 99.87  | 0.908            | 8.2  |
| 00123006     | 40.90            | 0.005            | 0.336                          | 7.50               | 0.121 | 41.58 | 0.581 | 0.005             | 0.003            | 0.001                         | 0.404                          | 0.295 | 99.94  | 0.908            | 8.2  |
| 00123007     | 41.46            | 0.004            | 0.226                          | 7.72               | 0.118 | 44.17 | 0.348 | 0.005             | 0.003            | 0.001                         | 0.381                          | 0.323 | 100.10 | 0.911            | 5.3  |
| 00123009     | 42.63            | 0.005            | 0.382                          | 7.42               | 0.125 | 41.80 | 0.704 | 0.008             | 0.003            | 0.001                         | 0.425                          | 0.290 | 99.52  | 0.909            | 5.7  |
| 00123104     | 40.55            | 0.006            | 0.404                          | 7.31               | 0.113 | 43.11 | 0.462 | 0.001             | 0.003            | 0.001                         | 0.549                          | 0.303 | 100.26 | 0.913            | 7.5  |
| 01010301     | 40.67            | 0.006            | 0.346                          | 7.48               | 0.121 | 41.25 | 0.798 | 0.006             | 0.003            | 0.001                         | 0.393                          | 0.294 | 99.84  | 0.908            | 8.5  |
| 01010303     | 40.62            | 0.006            | 0.399                          | 7.41               | 0.118 | 41.93 | 0.582 | 0.006             | 0.003            | 0.001                         | 0.371                          | 0.299 | 100.09 | 0.910            | 8.3  |
| 01010701     | 42.28            | 0.010            | 0.672                          | 7.78               | 0.126 | 42.19 | 0.971 | 0.005             | 0.003            | 0.001                         | 0.404                          | 0.299 | 99.55  | 0.906            | 4.8  |
| 01010704     | 41.09            | 0.008            | 0.522                          | 6.81               | 0.109 | 42.00 | 0.399 | 0.004             | 0.003            | 0.001                         | 0.367                          | 0.304 | 99.70  | 0.917            | 8.1  |
